# Supplementary material for: Photo-induced stereo- and regiospecific sulfonylation of C–C multiple bonds exploiting the dual reactivity of sulfonium iodate(i) species
Source: Royal Society of Chemistry journal article supplement (doi:10.1039/d3qo01188g), 2023-01-01

# Supporting Information

## The Royal Society of Chemistry (RSC)

### Photo-induced Stereo- and Regiospecific Sulfonylation of C=C Multiple Bond Exploiting the Dual-reactivity of Sulfonium Iodate(I) Species

Dr. Aakanksha Gurawa, Nitin Kumar, and Dr. Sudhir Kashyap\*

Carbohydrate Chemistry Research Laboratory (CCRL), Department of Chemistry,

Malaviya National Institute of Technology (MNIT), Jaipur-302 017, INDIA.

E-mail: [skashyap.chy@mnit.ac.in](mailto:skashyap.chy@mnit.ac.in), [skr.kashyap@gmail.com](mailto:skr.kashyap@gmail.com)

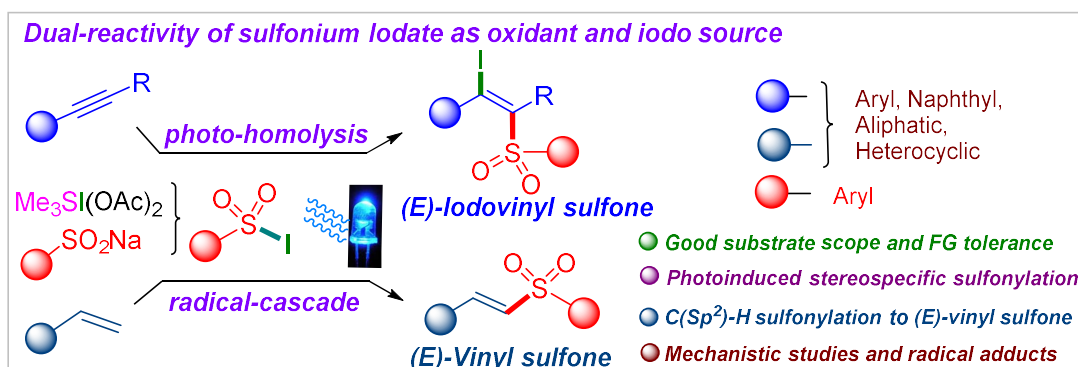

**Abstract:** Vinyl sulfones are privileged motifs for assembling prevalent biologically active molecules and represent “gateway functional groups” in medicinal chemistry and drug discovery. Augmented on our focus research toward bisfunctionalization of C-C multiple bonds, herein, we present a photo-induced (*E*)-stereospecific direct iodosulfonylation of alkynes and C(sp<sup>2</sup>)-H sulfonylation of alkenes by employing sulfonium iodate species. The scope and limitation of the atom-economical protocol were well illustrated with a broad range of structurally diverse substrates tolerating various sensitive moieties to access (*E*)-vinyl sulfones in highly regioselective transformation. The mechanistic investigations involving radical/spin trapping control experiments and isolation of unprecedented BHT-Tosyl adduct evidenced the photochemical radical-sulfonylation with tosyl iodide generated *in situ* and discovering the intrinsic dual-reactivity of Me<sub>3</sub>SI(OAc)<sub>2</sub> as oxidant as well as the source of iodine.

## Supporting Material

### Table of Contents

|                                                                              |                 |
|------------------------------------------------------------------------------|-----------------|
| <b>A. General Experimental Information</b>                                   | <b>S3-S5</b>    |
| <b>B. Optimizations Studies</b>                                              | <b>S6-S7</b>    |
| <b>C. Chemical Synthesis and Spectroscopic Characterization Data</b>         | <b>S8-S26</b>   |
| <b>D. Mechanistic Studies and Spectroscopic Data</b>                         | <b>S27-S29</b>  |
| <b>E. References for Supporting Information</b>                              | <b>S30-S31</b>  |
| <b>F. <math>^1\text{H}</math> and <math>^{13}\text{C}</math> NMR Spectra</b> | <b>S32- S77</b> |

## A. General Experimental Information.

### General Synthesis Information:

Reactions were run in screw capped glass vials (4 mL) stirred with Teflon®-coated magnetic stir bars. Moisture and air-sensitive reactions were performed in flame-dried round bottom flasks, fitted with rubber septa or glass gas adapters, under a positive pressure of nitrogen. Moisture and air-sensitive liquids or solutions were transferred via nitrogen-flushed syringe. Experiments were monitored by thin layer chromatography (TLC). Melting points were obtained in open capillary tubes using a micro melting point apparatus and were uncorrected.

### Materials:

Unless otherwise noted, materials were obtained from commercial suppliers and used without purification. Removal of solvent under reduced pressure refers to distillation with a Büchi rotary evaporator attached to a vacuum pump (~3 mmHg). Products obtained as solids or high boiling oils were dried under vacuum (~1 mmHg).

### Chromatography:

Analytical TLC was performed using Whatman 250-micron aluminium backed UV F254 pre-coated silica gel flexible plates. Subsequent to elution, ultraviolet illumination at 254 nm allowed for visualization of UV active materials. Staining with p-anisaldehyde, basic potassium permanganate solution, or Molisch's reagents allowed for further visualization.

### Physical Data:

Proton and Carbon nuclear magnetic resonance spectra ( $^1\text{H}$ ,  $^{13}\text{C}$  NMR) were recorded on Avance 300, 400 or 500 MHz and ECS 4000 MHz (JEOL) NMR spectrometers. The proton resonances are annotated as: chemical shift ( $\delta$ ) relative to tetramethylsilane ( $\delta$  0.0) using the residual solvent signal as an internal standard or tetramethylsilane itself: chloroform-d ( $\delta$  7.26, singlet), multiplicity (s, singlet; d, doublet; t, triplet; q, quartet; m, multiplet; br, broad), coupling constant ( $J$ , Hz), and number of protons for a given resonance is indicated by nH. The chemical shifts of  $^{13}\text{C}$  NMR are reported in ppm relative to the central line of the triplet at 77.00 ppm for  $\text{CDCl}_3$ . IR spectra were recorded on a PerkinElmer FT-IR spectrometer and wave numbers of maximum absorption peaks are presented in  $\text{cm}^{-1}$ . Mass analyses (ESI-MS) and HRMS were performed on Xevo G2-S QTOF (Waters, USA) Spectrometer. Shimadzu

UV-1800 Spectrophotometer for UV studies. A blue LED apparatus (7 W ribbon  $\lambda_{\text{max}} \sim 460$  nm) equipped with a magnetic stirrer and chiller was used as the light source.

**Abbreviations used:**

pTsNa: *p*-toluenesulfinate, PhSO<sub>2</sub>Na: sodium benzenesulfinate, 4-ClPhSO<sub>2</sub>Na: sodium 4-chloro benzenesulfinate, PhSO<sub>2</sub>NHNH<sub>2</sub>: sulfonyl hydrazide, CF<sub>3</sub>SO<sub>2</sub>Na: Langlois reagent, PhSO<sub>2</sub>I: *p*-tolylsulfonyl iodide, *t*-Bu: *tert*-butyl, MeCN: acetonitrile, DCE: dichloroethane, DCM: dichloromethane, MeOH: methanol, EtOH: ethanol, AcOH: acetic acid, THF: tetrahydrofuran, EtOAc: ethylacetate, DMF: N, N-dimethylformamide. TLC: thin layer chromatography, CFL: compact fluorescent lamp, PIDA: phenyliodonium diacetate, BAIB: bis(acetoxy)iodobenzene, LEDs: light emitting diodes, TEMPO: 2,2,6,6-tetramethylpiperidin-1-yl)oxyl, BHT: 2,6-di-*tert*-butyl-4-methylphenol, RT: room temperature.

**General Procedure for Sulfonylation:**

An oven-dried, 10 mL glass tube was equipped with a magnetic stir bar, a rubber septum, and a threaded Teflon cap. A nitrogen-filled balloon was fitted through the septum to sustain a nitrogen atmosphere. To this vessel was added a solution of alkene/alkyne (1.0 equiv.) in solvent (3 mL) *via* syringe followed by the sequential addition  $\text{Me}_3\text{SI}(\text{OAc})_2$  (1.2-2.5 equiv.) and sulfonyl source (1.5-2.5 equiv.) at room temperature (25 °C). The reaction mixture was then purged with nitrogen (gas) for another 5 minutes with the aid of an exit needle on the septum. A stirring rate was established at 900 rpm. The reaction tube was irradiated with visible light, a common 7 W Blue LED ribbon ( $\lambda_{\text{max}} \sim 460$  nm) under stirring. The distance between the light source and the reaction flask was maintained approximately 3-4 cm, resulted in the temperature increasing up to 35 °C. The tube was then submerged in an insulated bath to maintain temperature. For safety reasons, the reaction was carried out behind an *anti*-blast shield. The reaction was stirred until the complete consumption of starting material, typically for 6-12 h (adjudged by TLC). The reaction mixture was diluted with DCM (10 mL), quenched with saturated  $\text{NaHCO}_3$  (5 mL) and saturated aqueous sodium thiosulfate (2 mL) and extracted with DCM ( $3 \times 30$  mL). The combined organic layers were washed with brine solution, dried over anhydrous  $\text{Na}_2\text{SO}_4$ , concentrated *in vacuo* and purified by silica gel column chromatography (using gradient eluent of hexanes/EtOAc) to obtain the desired iodovinyl sulfone **4-33** or vinyl sulfone **34-43**.

**Light and Equipment Setup for the Photochemical Reaction:**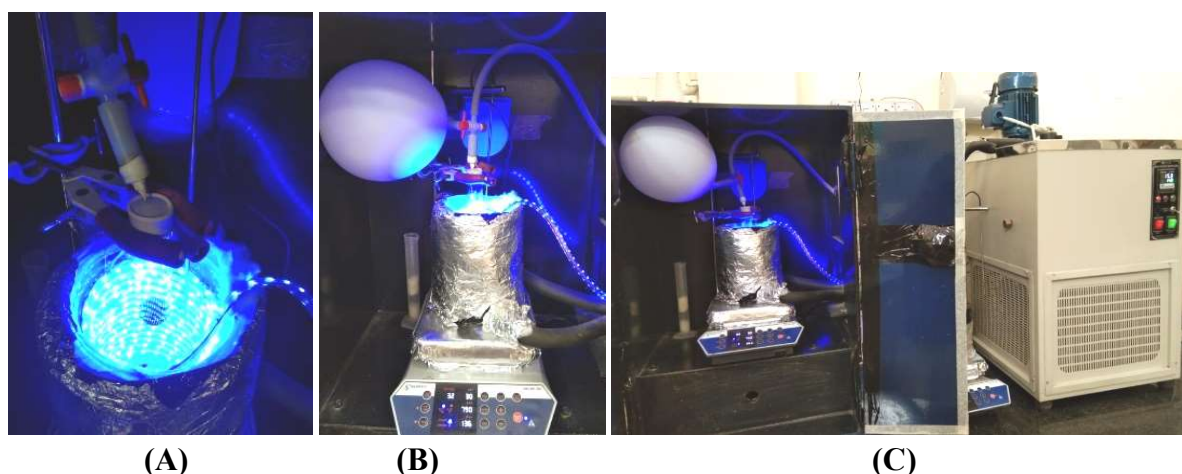

**Figure S1.** Reaction conditions for visible light mediated sulfonylation; (A) Blue LED irradiation setup, (B) Reaction vessel and insulated bath with circulation pipes (inlet, outlet),  $\text{N}_2$  balloon and vacuum tubing. (C) The complete reaction setup with reaction vessel, insulated bath, chiller and the circulation tubings.

## B. Optimizations Studies.

**Table S1.** Preliminary Studies and Optimization of (*E*)-Stereospecific Sulfonylation using Sulfonium Iodate Reagent.<sup>a</sup>

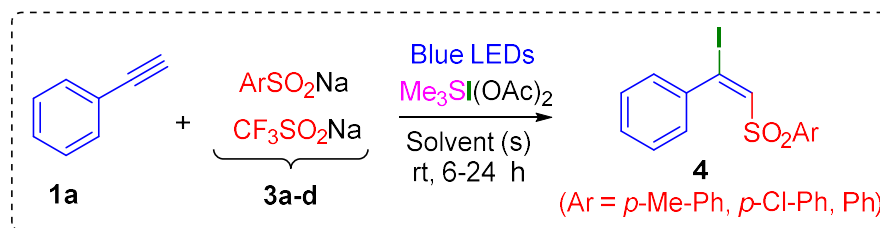

| S. No            | Reagent (equiv)                                              | 3a-d (equiv)                                          | Solvent                          | Yield % <sup>b</sup>  |
|------------------|--------------------------------------------------------------|-------------------------------------------------------|----------------------------------|-----------------------|
| 1.               | $\text{Me}_3\text{SI}(\text{OAc})_2$ (1.2)                   | pTsNa (1.5) ( <b>3a</b> )                             | MeCN                             | <b>4a</b> ; 37        |
| 2.               | $\text{Me}_3\text{SI}(\text{OAc})_2$ (1.2)                   | pTsNa (1.5) ( <b>3a</b> )                             | DCE                              | <b>4a</b> ; 68        |
| 3.               | $\text{Me}_3\text{SI}(\text{OAc})_2$ (1.2)                   | pTsNa (1.5) ( <b>3a</b> )                             | THF                              | <b>4a</b> ; 69        |
| 4.               | $\text{Me}_3\text{SI}(\text{OAc})_2$ (1.2)                   | pTsNa (1.5) ( <b>3a</b> )                             | 1,4-Dioxane                      | <b>4a</b> ; 65        |
| 5.               | $\text{Me}_3\text{SI}(\text{OAc})_2$ (1.2)                   | pTsNa (1.5) ( <b>3a</b> )                             | AcOH                             | <b>4a</b> ; 71        |
| 6.               | $\text{Me}_3\text{SI}(\text{OAc})_2$ (1.2)                   | pTsNa (1.5) ( <b>3a</b> )                             | DMF                              | <b>4a</b> ; 49        |
| 7.               | $\text{Me}_3\text{SI}(\text{OAc})_2$ (1.2)                   | pTsNa (1.5) ( <b>3a</b> )                             | Toluene                          | <b>4a</b> ; 38        |
| 8.               | $\text{Me}_3\text{SI}(\text{OAc})_2$ (1.2)                   | pTsNa (1.5) ( <b>3a</b> )                             | $\text{H}_2\text{O}$             | <b>4a</b> ; 50        |
| 9.               | $\text{Me}_3\text{SI}(\text{OAc})_2$ (1.2)                   | pTsNa (1.5) ( <b>3a</b> )                             | MeCN: $\text{H}_2\text{O}$ ; 2:1 | <b>4a</b> ; 54        |
| 10.              | <b><math>\text{Me}_3\text{SI}(\text{OAc})_2</math> (1.2)</b> | <b>pTsNa (1.5) (<b>3a</b>)</b>                        | <b>MeCN: AcOH; 2:1</b>           | <b>4a</b> ; <b>86</b> |
| 11. <sup>c</sup> | $\text{Me}_3\text{SI}(\text{OAc})_2$ (1.2)                   | pTsNa (1.5) ( <b>3a</b> )                             | MeCN: AcOH; 2:1                  | <b>4a</b> ; 28        |
| 12. <sup>d</sup> | $\text{Me}_3\text{SI}(\text{OAc})_2$ (1.2)                   | pTsNa (1.5) ( <b>3a</b> )                             | MeCN: AcOH; 2:1                  | <b>4a</b> ; 41        |
| 13. <sup>e</sup> | $\text{Me}_3\text{SI}(\text{OAc})_2$ (1.2)                   | pTsNa (1.5) ( <b>3a</b> )                             | MeCN: AcOH; 2:1                  | <b>4a</b> ; 53        |
| 14.              | $\text{Me}_3\text{SI}(\text{OAc})_2$ (1.2)                   | 4-Cl PhSO <sub>2</sub> Na (1.5) ( <b>3b</b> )         | MeCN: AcOH; 2:1                  | <b>4b</b> ; 76        |
| 15.              | $\text{Me}_3\text{SI}(\text{OAc})_2$ (1.2)                   | PhSO <sub>2</sub> Na (1.5) ( <b>3c</b> )              | MeCN: AcOH; 2:1                  | <b>4c</b> ; 60        |
| 16.              | $\text{Me}_3\text{SI}(\text{OAc})_2$ (1.2)                   | $\text{CF}_3\text{SO}_2\text{Na}$ (1.5) ( <b>3d</b> ) | MeCN: AcOH; 2:1                  | <b>4d</b> ; NR        |

<sup>a</sup> Reaction conditions: Phenyl acetylene **1a** (1.0 mmol, 1.0 equiv),  $\text{Me}_3\text{SI}(\text{OAc})_2$  (1.2 equiv),  $\text{ArSO}_2\text{Na}$ ; **3a-3c** or  $\text{CF}_3\text{SO}_2\text{Na}$ ; **3d** (1.5 equiv), solvent (2 mL), stirred at 25 to 35 °C for 12 h, irradiated with Blue LEDs (7W), unless otherwise noted. <sup>b</sup> The isolated and unoptimized yields after chromatography. <sup>c</sup> The reaction was performed in dark condition. <sup>d</sup> The reaction was performed in light. <sup>e</sup> The reaction was performed in green LEDs.

**Table S2.** Screening of (*E*)-Stereospecific Vinyl-Sulfonylation using Sulfonium Iodate Reagent.<sup>a</sup>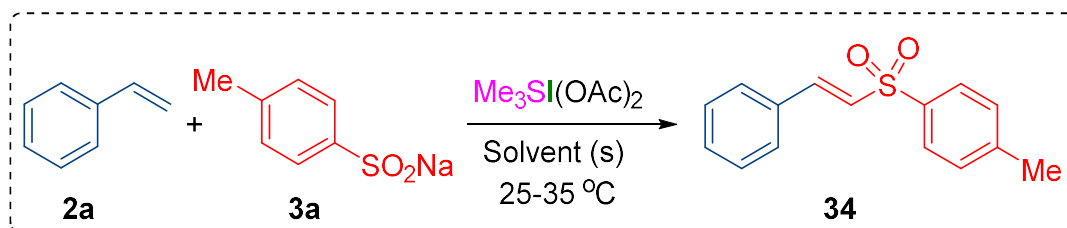

| S. No            | Reagent (equiv)                                              | 3a (equiv)         | Solvent                                        | Yield % <sup>b</sup> |
|------------------|--------------------------------------------------------------|--------------------|------------------------------------------------|----------------------|
| 1.               | $\text{Me}_3\text{SI}(\text{OAc})_2$ (1.5)                   | pTsNa (1.5)        | MeCN                                           | 28                   |
| 2.               | $\text{Me}_3\text{SI}(\text{OAc})_2$ (1.5)                   | pTsNa (2.5)        | MeCN                                           | 57                   |
| 3.               | $\text{Me}_3\text{SI}(\text{OAc})_2$ (1.2)                   | pTsNa (2.5)        | MeCN                                           | 36                   |
| 4.               | $\text{Me}_3\text{SI}(\text{OAc})_2$ (1.5)                   | pTsNa (2.5)        | $\text{H}_2\text{O}$                           | 20                   |
| 5.               | $\text{Me}_3\text{SI}(\text{OAc})_2$ (1.5)                   | pTsNa (2.5)        | AcOH                                           | 12                   |
| 6.               | $\text{Me}_3\text{SI}(\text{OAc})_2$ (1.5)                   | pTsNa (2.5)        | 1,4-Dioxane                                    | 12                   |
| 7.               | $\text{Me}_3\text{SI}(\text{OAc})_2$ (1.5)                   | pTsNa (2.5)        | Toluene                                        | 18                   |
| 8.               | $\text{Me}_3\text{SI}(\text{OAc})_2$ (1.5)                   | pTsNa (2.5)        | MeOH                                           | 22                   |
| 9.               | $\text{Me}_3\text{SI}(\text{OAc})_2$ (1.5)                   | pTsNa (2.5)        | 1,4-Dioxane                                    | 8                    |
| 10.              | $\text{Me}_3\text{SI}(\text{OAc})_2$ (1.5)                   | pTsNa (2.5)        | DCM                                            | 70                   |
| <b>11.</b>       | <b><math>\text{Me}_3\text{SI}(\text{OAc})_2</math> (1.5)</b> | <b>pTsNa (2.5)</b> | <b>MeCN</b>                                    | <b>91</b>            |
| 12. <sup>c</sup> | $\text{Me}_3\text{SI}(\text{OAc})_2$ (1.5)                   | pTsNa (2.5)        | MeCN                                           | 33                   |
| 13.              | $\text{Me}_3\text{SI}(\text{OAc})_2$ (1.5)                   | pTsNa (2.5)        | $\text{CH}_3\text{CN}:\text{H}_2\text{O}; 2:1$ | 46                   |
| 14.              | $\text{Me}_3\text{SI}(\text{OAc})_2$ (1.5)                   | pTsNa (2.5)        | $\text{CH}_3\text{CN}:\text{AcOH}; 1:2$        | 27                   |
| 15.              | $\text{Me}_3\text{SI}(\text{OAc})_2$ (1.5)                   | pTsNa (2.5)        | $\text{CH}_3\text{CN}:\text{AcOH}; 1:1$        | 33                   |
| 16.              | $\text{Me}_3\text{SI}(\text{OAc})_2$ (1.5)                   | pTsNa (2.5)        | $\text{CH}_3\text{CN}:\text{AcOH}; 2:1$        | 32                   |

<sup>a</sup> Reaction conditions: **2a** (1.0 mmol, 1.0 equiv),  $\text{Me}_3\text{SI}(\text{OAc})_2$  (1.5 equiv),  $\text{ArSO}_2\text{Na}$  (2.5 equiv), solvent (2 mL), stirred at 25 °C for 12 h, irradiated with a Blue LEDs (7W), unless otherwise noted. <sup>b</sup> The isolated and unoptimized yields after chromatography. <sup>c</sup> The reaction was performed in dark condition.

## C. Chemical Synthesis and Spectroscopic Characterization Data.

### *Representative Procedure for Iodovinyl sulfonylation:*

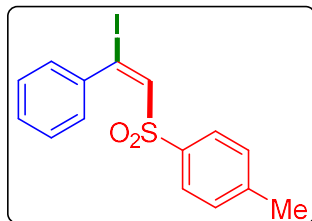

**(E)-1-((2-iodo-2-phenylvinyl)sulfonyl)-4-methylbenzene (4a):** A preformed solution of ethynylbenzene **1a** (102 mg, 1.0 mmol, 1.0 equiv) in CH<sub>3</sub>CN:AcOH (2:1; 3 mL) was treated with 4-Methylphenyl sulfinic acid sodium salt (267 mg, 1.5 mmol, 1.5 equiv.) followed by Me<sub>3</sub>SI(OAc)<sub>2</sub> (386 mg, 1.2 mmol, 1.2 equiv.) at room temperature (25 °C). The resulting mixture was stirred under nitrogen atmosphere and irradiated with visible light (7 W Blue LED strips). Following the usual workup and purification by silica gel column chromatography using hexanes as eluent, the desired compound **4a** was obtained as pale-yellow oil (330 mg, 0.86 mmol, 86%). R<sub>f</sub> (4% EtOAc/Hexane) 0.5; <sup>1</sup>H NMR (400 MHz, CDCl<sub>3</sub>) δ 7.46 (d, *J* = 8.4 Hz, 2H), 7.36 (s, 1H), 7.31-7.25 (m, 3H), 7.24 (d, *J* = 1.5 Hz, 2H), 7.19 (d, *J* = 8.1 Hz, 2H), 2.39 (s, 3H); <sup>13</sup>C NMR (101 MHz, CDCl<sub>3</sub>) δ 144.52, 141.21, 139.60, 137.25, 129.72, 129.62, 127.86, 127.81, 127.64, 114.13, 21.58; the overall spectroscopic data are in complete agreement with assigned structures and consistent with literature.<sup>[1-10]</sup>

### *Procedure for Gram-scale synthesis of iodovinyl sulfone:*

A preformed solution of ethynylbenzene **1a** (1 g, 9.804 mmol) in CH<sub>3</sub>CN: AcOH (2:1; 10 mL) was treated with 4-Methylphenyl sulfinic acid sodium salt (2.6 g, 14.706 mmol, 1.5 equiv.) followed by Me<sub>3</sub>SI(OAc)<sub>2</sub> (3.8 g, 11.765 mmol, 1.2 equiv.) at room temperature (25 °C). The resulting mixture was stirred under nitrogen atmosphere and irradiated with visible light (7 W Blue LED). Following the usual workup and purification by silica gel column chromatography using hexanes as eluent, the desired compound **4a** was obtained as pale-yellow oil (3.0 g, 7.843 mmol, 80%). The overall spectroscopic data are in complete agreement with assigned structures and consistent with literature.<sup>[1-10]</sup>



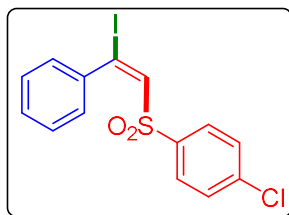

**(E)-1-chloro-4-((2-iodo-2-phenylvinyl)sulfonyl)benzene (4b):** Following general iodovinyl sulfonylation procedure using ethynylbenzene **1a** (90 mg, 100  $\mu$ L, 0.762 mmol) and purified by silica gel column chromatography, eluting with hexanes afforded the title compound as white solid (234 mg, 0.579 mmol, 76%).  $^1\text{H}$  NMR (400 MHz,  $\text{CDCl}_3$ )  $\delta$  7.48-7.44 (m, 2H), 7.39 (s, 1H), 7.34-7.27 (m, 5H), 7.20 (d,  $J$  = 1.4 Hz, 2H);  $^{13}\text{C}$  NMR (101 MHz,  $\text{CDCl}_3$ )  $\delta$  140.94, 140.20, 139.44, 138.60, 129.94, 129.26, 129.22, 128.01, 127.60, 115.23; the overall spectroscopic data are in complete agreement with assigned structures and consistent with literature.<sup>[1, 4, 7]</sup>

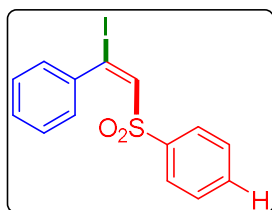

**(E)-1-iodo-2-(phenylsulfonyl)vinylbenzene (4c):** Following general iodovinyl sulfonylation procedure using ethynylbenzene **1a** (90 mg, 100  $\mu$ L, 0.762 mmol) and purified by silica gel column chromatography, eluting with hexanes afforded the title compound as white solid (169 mg, 0.457 mmol, 60%).  $^1\text{H}$  NMR (400 MHz,  $\text{CDCl}_3$ )  $\delta$  7.46 (d,  $J$  = 8.6 Hz, 2H), 7.39 (s, 1H), 7.36-7.28 (m, 6H), 7.19 (dd,  $J$  = 8.2, 1.6 Hz, 2H);  $^{13}\text{C}$  NMR (101 MHz,  $\text{CDCl}_3$ )  $\delta$  140.96, 140.20, 139.45, 138.62, 129.95, 129.27, 129.23, 128.01, 127.61, 115.22; the overall spectroscopic data are in complete agreement with assigned structures and consistent with literature.<sup>[1, 3-7]</sup>

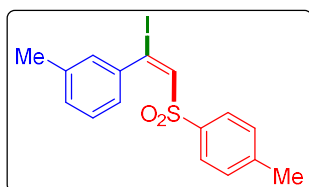

**(E)-1-(1-iodo-2-tosylvinyl)-3-methylbenzene (5):** Following general iodovinyl sulfonylation procedure using 1-ethynyl-3-methylbenzene **1b** (90 mg, 100  $\mu$ L, 0.775 mmol) and purified by silica gel column chromatography, eluting with hexanes afforded the title compound as white

solid (194 mg, 0.488 mmol, 63%).  $^1\text{H}$  NMR (400 MHz,  $\text{CDCl}_3$ )  $\delta$  7.44 (d,  $J$  = 8.4 Hz, 2H), 7.35 (s, 1H), 7.20–7.15 (m, 3H), 7.10 (d,  $J$  = 7.9 Hz, 1H), 7.04 (d,  $J$  = 7.6 Hz, 1H), 6.92 (s, 1H), 2.40 (s, 3H), 2.28 (s, 3H);  $^{13}\text{C}$  NMR (101 MHz,  $\text{CDCl}_3$ )  $\delta$  144.41, 141.18, 139.52, 137.62, 137.34, 130.50, 129.51, 127.95, 127.88, 127.79, 124.74, 114.48, 21.56, 21.22; the overall spectroscopic data are in complete agreement with assigned structures and consistent with literature.<sup>[5]</sup>

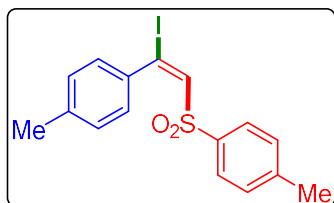

**(E)-1-((1-iodo-2-(p-tolyl)vinyl)sulfonyl)-4-methylbenzene (6):** Following general iodovinyl sulfonylation procedure using 1-ethynyl-4-methylbenzene **1c** (92 mg, 100  $\mu\text{L}$ , 0.789 mmol) and purified by silica gel column chromatography, eluting with hexanes afforded the title compound as white solid (192 mg, 0.481 mmol, 61%).  $^1\text{H}$  NMR (400 MHz,  $\text{CDCl}_3$ )  $\delta$  7.50 (d,  $J$  = 8.3 Hz, 2H), 7.30 (s, 1H), 7.20 (d,  $J$  = 8.1 Hz, 2H), 7.16 (d,  $J$  = 8.2 Hz, 2H), 7.10 (d,  $J$  = 8.0 Hz, 2H), 2.40 (s, 3H), 2.36 (s, 3H);  $^{13}\text{C}$  NMR (101 MHz,  $\text{CDCl}_3$ )  $\delta$  144.50, 140.57, 140.16, 137.39, 136.82, 129.61, 128.53, 127.83, 127.77, 114.73, 21.60, 21.43; the overall spectroscopic data are in complete agreement with assigned structures and consistent with literature.<sup>[2,5,7,10,15]</sup>

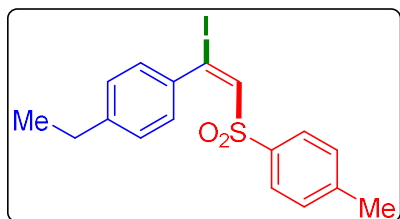

**(E)-1-ethyl-4-(1-iodo-2-tosylvinyl)benzene (7):** Following general iodovinyl sulfonylation procedure using 1-ethynyl-4-ethylbenzene **1d** (93 mg, 100  $\mu\text{L}$ , 0.715 mmol) and purified by silica gel column chromatography, eluting with hexanes afforded the title compound as white solid (186 mg, 0.450 mmol, 63%).  $^1\text{H}$  NMR (400 MHz,  $\text{CDCl}_3$ )  $\delta$  7.46 (d,  $J$  = 8.4 Hz, 2H), 7.33 (s, 1H), 7.17 (dd,  $J$  = 8.2, 2.0 Hz, 4H), 7.10 (d,  $J$  = 8.3 Hz, 2H), 2.65 (q,  $J$  = 7.6 Hz, 2H), 2.39 (s, 3H), 1.25 (t,  $J$  = 7.6 Hz, 3H);  $^{13}\text{C}$  NMR (101 MHz,  $\text{CDCl}_3$ )  $\delta$  146.40, 144.39, 140.85, 137.35, 136.95, 129.54, 127.91, 127.87, 127.34, 114.75, 28.71, 21.59, 15.28; the overall

spectroscopic data are in complete agreement with assigned structures and consistent with literature.<sup>[2-4]</sup>

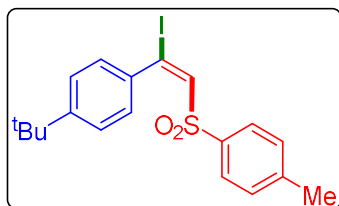

**(E)-1-(tert-butyl)-4-(1-iodo-2-tosylvinyl)benzene (8):** Following general iodovinyl sulfonylation procedure using 1-(tert-butyl)-4-ethynylbenzene **1e** (88 mg, 100  $\mu$ L, 0.557 mmol) and purified by silica gel column chromatography, eluting with hexanes afforded the title compound as yellow semi-solid (159 mg, 0.362 mmol, 65%).  $^1\text{H}$  NMR (400 MHz,  $\text{CDCl}_3$ )  $\delta$  7.41 (d,  $J$  = 8.4 Hz, 2H), 7.37 (s, 1H), 7.25 (d,  $J$  = 9.9 Hz, 2H), 7.13 (t,  $J$  = 8.6 Hz, 4H), 2.37 (s, 3H), 1.32 (s, 9H);  $^{13}\text{C}$  NMR (101 MHz,  $\text{CDCl}_3$ )  $\delta$  153.21, 144.24, 141.21, 137.20, 136.56, 129.41, 127.87, 127.70, 124.77, 114.71, 34.78, 31.16, 31.07, 21.55; the overall spectroscopic data are in complete agreement with assigned structures and consistent with literature.<sup>[3]</sup>

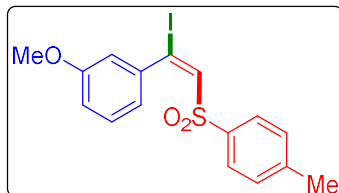

**(E)-1-(1-iodo-2-tosylvinyl)-3-methoxybenzene (9):** Following general iodovinyl sulfonylation procedure using 1-ethynyl-3-methoxybenzene **1f** (104 mg, 100  $\mu$ L, 0.787 mmol) and purified by silica gel column chromatography, eluting with hexanes afforded the title compound as white solid (209 mg, 0.504 mmol, 64%). Mp: 89-91  $^\circ\text{C}$ ;  $^1\text{H}$  NMR (400 MHz,  $\text{CDCl}_3$ )  $\delta$  7.50-7.44 (m, 2H), 7.35 (s, 1H), 7.23-7.16 (m, 3H), 6.87-6.80 (m, 2H), 6.65 (dd,  $J$  = 2.6, 1.6 Hz, 1H), 3.76 (s, 3H), 2.39 (s, 3H);  $^{13}\text{C}$  NMR (101 MHz,  $\text{CDCl}_3$ )  $\delta$  158.65, 144.46, 141.46, 140.59, 137.11, 129.52, 128.96, 127.87, 119.97, 115.85, 113.55, 112.46, 55.16, 21.53; HRMS (ESI)  $m/z$   $[\text{M} + \text{NH}_4]^+$  calculated for  $[\text{C}_{16}\text{H}_{19}\text{NIO}_3\text{S}]^+$ : 432.0125; found: 432.0112.

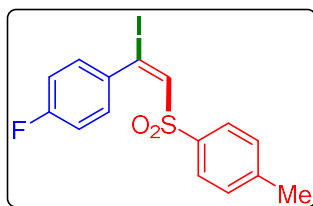

**(E)-1-fluoro-4-(1-iodo-2-tosylvinyl)benzene (10):** Following general iodovinyl sulfonylation procedure using 4-fluoro-2-ethynylbenzene **1g** (105 mg, 0.873 mmol) and purified by silica gel column chromatography, eluting with hexanes afforded the title compound as white solid (340 mg, 0.847 mmol, 97%).  $^1\text{H}$  NMR (400 MHz,  $\text{CDCl}_3$ )  $\delta$  7.49 (d,  $J$  = 8.4 Hz, 2H), 7.35 (s, 1H), 7.26 (dd,  $J$  = 9.2, 4.8 Hz, 3H), 7.22 (s, 1H), 6.98 (t,  $J$  = 8.6 Hz, 2H), 2.41 (s, 3H);  $^{13}\text{C}$  NMR (101 MHz,  $\text{CDCl}_3$ )  $\delta$  163.17 (d,  $^1J_{\text{CF}}$  = 251.4 Hz), 144.78, 141.61, 137.19, 135.67, 135.65 (d,  $^4J_{\text{CF}}$  = 3.6 Hz), 130.02, 129.98 (d,  $^3J_{\text{CF}}$  = 8.8 Hz), 127.78, 115.06 (d,  $^2J_{\text{CF}}$  = 22.1 Hz), 114.95, 112.54, 21.60; the overall spectroscopic data are in complete agreement with assigned structures and consistent with literature.<sup>[1,3]</sup>

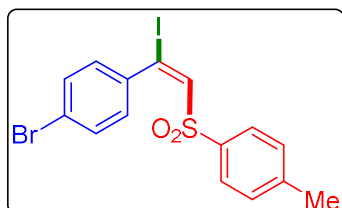

**(E)-1-bromo-4-(1-iodo-2-tosylvinyl)benzene (11):** Following general iodovinyl sulfonylation procedure using 4-bromo-2-ethynylbenzene **1h** (100 mg, 0.552 mmol) and purified by silica gel column chromatography, eluting with hexanes afforded the title compound as white solid (158 mg, 0.342 mmol, 62%).  $^1\text{H}$  NMR (400 MHz,  $\text{CDCl}_3$ )  $\delta$  7.50 (d,  $J$  = 8.3 Hz, 2H), 7.43 (d,  $J$  = 8.5 Hz, 2H), 7.34 (s, 1H), 7.24 (d,  $J$  = 7.8 Hz, 2H), 7.11 (d,  $J$  = 8.5 Hz, 2H), 2.42 (s, 3H);  $^{13}\text{C}$  NMR (101 MHz,  $\text{CDCl}_3$ )  $\delta$  144.90, 141.73, 138.54, 137.09, 131.15, 129.79, 129.24, 127.87, 124.19, 111.93, 21.65; the overall spectroscopic data are in complete agreement with assigned structures and consistent with literature.<sup>[2,3,6]</sup>

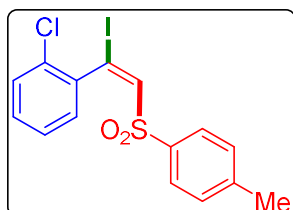

**(E)-1-chloro-2-(1-iodo-2-tosyl)vinyl)benzene (12):** Following general iodovinyl sulfonylation procedure using 2-chloro-1-ethynylbenzene **1i** (112 mg, 100  $\mu$ L, 0.817 mmol) and purified by silica gel column chromatography, eluting with hexanes afforded the title compound as yellow solid (229 mg, 0.547 mmol, 67%).  $^1\text{H}$  NMR (400 MHz,  $\text{CDCl}_3$ )  $\delta$  7.51 (d,  $J$  = 8.1 Hz, 2H), 7.36 (s, 1H), 7.29-7.27 (m, 3H), 7.25-7.21 (m, 3H), 2.40 (s, 3H);  $^{13}\text{C}$  NMR (101 MHz,  $\text{CDCl}_3$ )  $\delta$  164.44, 161.93, 141.50, 140.10, 135.55, 133.63, 130.07, 129.07, 127.73, 115.28, 115.20, 115.06, 114.98, 113.13; the overall spectroscopic data are in complete agreement with assigned structures and consistent with literature.<sup>[1]</sup>

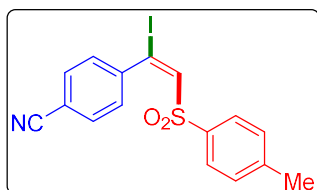

**(E)-4-(1-iodo-2-tosylvinyl)benzonitrile (13):** Following general iodovinyl sulfonylation procedure using 4-ethynyl benzonitrile **1j** (100 mg, 0.787 mmol) and purified by silica gel column chromatography, eluting with hexanes afforded the title compound as pale yellow semi solid (248 mg, 0.606 mmol, 77%).  $^1\text{H}$  NMR (400 MHz,  $\text{CDCl}_3$ )  $\delta$  7.64-7.60 (m, 2H), 7.52 (d,  $J$  = 8.4 Hz, 2H), 7.38-7.34 (m, 3H), 7.27 (d,  $J$  = 9.6 Hz, 2H), 2.44 (s, 3H);  $^{13}\text{C}$  NMR (101 MHz,  $\text{CDCl}_3$ )  $\delta$  145.26, 144.08, 142.22, 136.80, 131.69, 129.99, 128.20, 127.80, 117.97, 113.28, 109.76, 21.65; the overall spectroscopic data are in complete agreement with assigned structures and consistent with literature.<sup>[2]</sup>

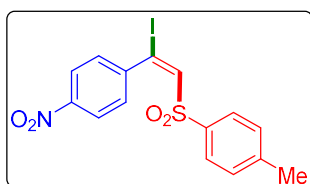

**(E)-1-((1-iodo-2-(4-nitrophenyl)vinyl)sulfonyl)-4-methylbenzene (14):** Following general iodovinyl sulfonylation procedure using 1-ethynyl-4-nitrobenzene **1k** (100 mg, 0.680 mmol) and purified by silica gel column chromatography, eluting with hexanes afforded the title compound as white solid (277 mg, 0.646 mmol, 95%).  $^1\text{H}$  NMR (400 MHz,  $\text{CDCl}_3$ )  $\delta$  8.12 (d,  $J$  = 8.8 Hz, 2H), 7.48 (d,  $J$  = 8.4 Hz, 2H), 7.35 (d,  $J$  = 8.8 Hz, 2H), 7.31 (s, 1H), 7.21 (d,  $J$  = 7.8 Hz, 2H), 2.37 (s, 3H);  $^{13}\text{C}$  NMR (101 MHz,  $\text{CDCl}_3$ )  $\delta$  148.01, 145.94, 145.39, 142.38, 136.75, 130.05, 128.48, 127.83, 123.20, 109.11, 21.66; the overall spectroscopic data are in complete agreement with assigned structures and consistent with literature.<sup>[4]</sup>

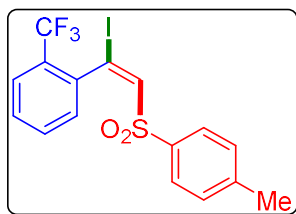

**(E)-1-(1-iodo-2-tosylvinyl)-2-(trifluoromethyl)sulfonylbenzene (15):** Following general iodovinyl sulfonylation procedure using 1-ethynyl-2-(trifluoromethyl)benzene **1l** (150 mg, 100  $\mu$ L, 0.829 mmol) and purified by silica gel column chromatography, eluting with hexanes afforded the title compound as white solid (273 mg, 0.605 mmol, 73%). Mp: 154-156  $^{\circ}$ C;  $^1\text{H}$  NMR (400 MHz,  $\text{CDCl}_3$ )  $\delta$  7.65 (d,  $J$  = 7.8 Hz, 1H), 7.57 (d,  $J$  = 8.4 Hz, 3H), 7.48 (t,  $J$  = 7.7 Hz, 1H), 7.28 (s, 3H), 7.26 (s, 1H), 2.43 (s, 3H);  $^{13}\text{C}$  NMR (101 MHz,  $\text{CDCl}_3$ )  $\delta$  145.39 (d,  $^1J_{\text{CF}}$  = 251.9 Hz), 140.85, 137.15 (d,  $^2J_{\text{CF}}$  = 50.5 Hz), 129.54, 127.89 (d,  $^4J_{\text{CF}}$  = 4.8 Hz), 127.34, 114.75, 25.15 (d,  $^3J_{\text{CF}}$  = 8.9 Hz), 15.28; HRMS (ESI)  $m/z$   $[\text{M} + \text{NH}_4]^+$  calculated for  $[\text{C}_{16}\text{H}_{16}\text{NF}_3\text{IO}_2\text{S}]^+$ : 469.9893; found: 469.9879.

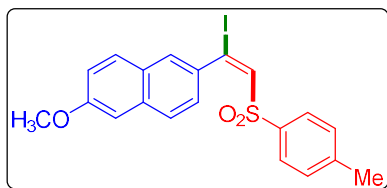

**(E)-2-(1-iodo-2-tosylvinyl)-6-methoxynaphthalene (16):** Following general iodo vinyl sulfonylation procedure using 2-ethynyl-6-methoxynaphthalene **1m** (100 mg, 0.549 mmol) and purified by silica gel column chromatography, eluting with hexanes afforded the title compound as yellow solid (209 mg, 0.450 mmol, 82%). Mp: 126-128  $^{\circ}$ C;  $^1\text{H}$  NMR (400 MHz,  $\text{CDCl}_3$ )  $\delta$  7.67 (d,  $J$  = 9.0 Hz, 1H), 7.61 (d,  $J$  = 9.2 Hz, 2H), 7.43 (s, 1H), 7.39 (d,  $J$  = 8.3 Hz, 2H), 7.24-7.16 (m, 2H), 7.10 (d,  $J$  = 2.5 Hz, 1H), 7.05 (d,  $J$  = 8.0 Hz, 2H), 3.94 (s, 3H), 2.32 (s, 3H);  $^{13}\text{C}$  NMR (101 MHz,  $\text{CDCl}_3$ )  $\delta$  158.90, 144.42, 141.25, 137.32, 134.96, 134.50, 130.07, 129.44, 127.86, 127.43, 127.32, 126.48, 125.61, 119.65, 114.92, 105.75, 55.39, 21.52; HRMS (ESI)  $m/z$   $[\text{M} + \text{NH}_4]^+$  calculated for  $[\text{C}_{20}\text{H}_{21}\text{NIO}_3\text{S}]^+$ : 482.0281; found: 482.0267.

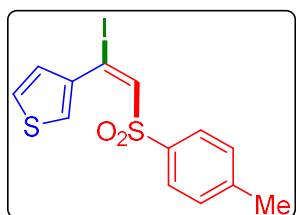

**(E)-3-(1-iodo-2-tosylvinyl)thiophene (17):** Following general iodovinyl sulfonylation procedure using 3-ethynylthiophene **1n** (100 mg, 0.926 mmol) and purified by silica gel column chromatography, eluting with hexanes afforded the title compound as pale yellow semi solid (224 mg, 0.574 mmol, 62%).  $^1\text{H}$  NMR (400 MHz,  $\text{CDCl}_3$ )  $\delta$  7.54-7.51 (m, 1H), 7.44 (d,  $J$  = 8.3 Hz, 2H), 7.28 (s, 1H), 7.13 (d,  $J$  = 8.3 Hz, 3H), 6.90 (dd,  $J$  = 5.1, 1.3 Hz, 1H), 2.32 (s, 3H);  $^{13}\text{C}$  NMR (101 MHz,  $\text{CDCl}_3$ )  $\delta$  144.50, 141.31, 138.68, 137.09, 129.54, 128.34, 127.60, 127.51, 125.26, 107.45, 21.56; the overall spectroscopic data are in complete agreement with assigned structures and consistent with literature.<sup>[1-3,7]</sup>

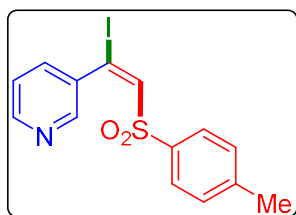

**(E)-3-(1-iodo-2-tosylvinyl)pyridine (18):** Following general iodovinyl sulfonylation procedure using 3-ethynyl pyridine **1o** (100 mg, 0.971 mmol) and purified by silica gel column chromatography, eluting with hexanes afforded the title compound as pale yellow solid (224 mg, 0.583 mmol, 60%). Mp: 150-152 °C;  $^1\text{H}$  NMR (400 MHz,  $\text{CDCl}_3$ )  $\delta$  8.56 (dd,  $J$  = 4.9, 1.6 Hz, 1H), 8.45 (dd,  $J$  = 2.4, 0.9 Hz, 1H), 7.64-7.60 (m, 1H), 7.52 (d,  $J$  = 8.3 Hz, 2H), 7.44 (s, 1H), 7.30-7.25 (m, 3H), 2.42 (s, 3H);  $^{13}\text{C}$  NMR (101 MHz,  $\text{CDCl}_3$ )  $\delta$  150.37, 147.49, 145.13, 142.72, 136.97, 136.03, 135.21, 129.99, 127.80, 122.62, 108.99, 21.65; the overall spectroscopic data are in complete agreement with assigned structures and consistent with literature.<sup>[3]</sup>

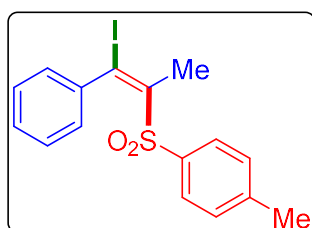

**(E)-1-((1-iodo-1-phenylprop-1-en-2-yl)sulfonyl)-4-methylbenzene (19):** Following general iodovinyl sulfonylation procedure using prop-1-yn-1-ylbenzene **1p** (93 mg, 0.704 mmol) and purified by silica gel column chromatography, eluting with hexanes afforded the title compound as white solid (174 mg, 0.436 mmol, 62%).  $^1\text{H}$  NMR (400 MHz,  $\text{CDCl}_3$ )  $\delta$  7.39 (d,  $J$  = 8.4 Hz, 2H), 7.24-7.21 (m, 3H), 7.16 (d,  $J$  = 8.5 Hz, 2H), 7.12-7.09 (m, 2H), 2.51 (s, 3H), 2.39 (s, 3H);  $^{13}\text{C}$  NMR (101 MHz,  $\text{CDCl}_3$ )  $\delta$  144.13, 143.89, 142.94, 137.22, 129.50, 129.42,

128.59, 127.67, 127.56, 115.73, 27.05, 21.60; the overall spectroscopic data are in complete agreement with assigned structures and consistent with literature.<sup>[2,3]</sup>

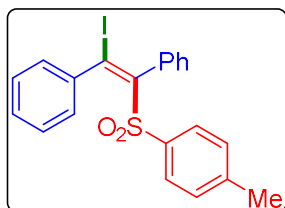

**(E)-(1-iodo-2-tosylethene-1,2-diyl)dibenzene (20):** Following general iodovinyl sulfonylation procedure using 1,2-diphenylethyne **1q** (100 mg, 0.561 mmol) and purified by silica gel column chromatography, eluting with hexanes afforded the title compound as white solid (170 mg, 0.370 mmol, 66%). <sup>1</sup>H NMR (400 MHz, CDCl<sub>3</sub>)  $\delta$  7.33-7.24 (m, 8H), 7.20-7.16 (m, 2H), 7.10 (d,  $J$  = 8.0 Hz, 2H), 7.02 (d,  $J$  = 8.3 Hz, 2H), 2.29 (s, 3H); <sup>13</sup>C NMR (101 MHz, CDCl<sub>3</sub>)  $\delta$  149.00, 144.23, 142.46, 139.30, 136.67, 130.23, 129.16, 128.96, 128.48, 128.29, 127.81, 127.31, 118.05, 21.59; the overall spectroscopic data are in complete agreement with assigned structures and consistent with literature.<sup>[2]</sup>

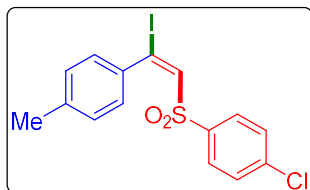

**(E)-1-chloro-4-((2-iodo-2-(p-tolyl)vinyl)sulfonyl)benzene (21):** Following general iodovinyl sulfonylation procedure using 1-ethynyl-4-methylbenzene **1c** (92 mg, 100  $\mu$ L, 0.789 mmol) and purified by silica gel column chromatography, eluting with hexanes afforded the title compound as white solid (257 mg, 0.615 mmol, 78%). <sup>1</sup>H NMR (400 MHz, CDCl<sub>3</sub>)  $\delta$  7.50 (d,  $J$  = 8.6 Hz, 2H), 7.34 (d,  $J$  = 10.1 Hz, 3H), 7.14-7.07 (m, 4H), 2.36 (s, 3H); <sup>13</sup>C NMR (101 MHz, CDCl<sub>3</sub>)  $\delta$  140.46, 140.27, 140.15, 138.66, 136.62, 129.27, 129.17, 128.62, 127.70, 115.83, 21.43; the overall spectroscopic data are in complete agreement with assigned structures and consistent with literature.<sup>[5-7]</sup>

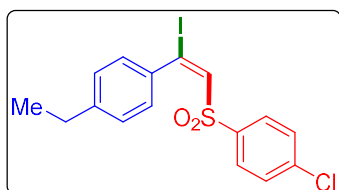



**(E)-1-chloro-4-((2-(4-ethylphenyl)-2-iodovinyl)sulfonyl)benzene (22):** Following general iodovinyl sulfonylation procedure using 1-ethynyl-4-ethylbenzene **1d** (93 mg, 100  $\mu$ L, 0.715 mmol) and purified by silica gel column chromatography, eluting with hexanes afforded the title compound as white solid (232 mg, 0.536 mmol, 75%).  $^1\text{H}$  NMR (400 MHz,  $\text{CDCl}_3$ )  $\delta$  7.46 (d,  $J$  = 8.6 Hz, 2H), 7.36 (s, 1H), 7.30 (d,  $J$  = 8.6 Hz, 2H), 7.13-7.07 (m, 4H), 2.65 (q,  $J$  = 7.6 Hz, 2H), 1.25 (t,  $J$  = 7.6 Hz, 3H);  $^{13}\text{C}$  NMR (101 MHz,  $\text{CDCl}_3$ )  $\delta$  146.68, 140.51, 140.02, 138.55, 136.71, 129.28, 129.03, 127.78, 127.42, 115.74, 28.68, 15.36; the overall spectroscopic data are in complete agreement with assigned structures and consistent with literature.<sup>[4]</sup>

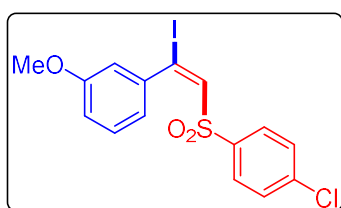

**(E)-1-(2-((4-chlorophenyl)sulfonyl)-1-iodovinyl)-3-methoxybenzene (23):** Following iodovinyl sulfonylation procedure using 1-ethynyl-3-methoxybenzene **1f** (104 mg, 100  $\mu$ L, 0.787 mmol) and purified by silica gel column chromatography, eluting with hexanes afforded the title compound as pale yellow semi solid (225 mg, 0.519 mmol, 66%). Mp: 73-75  $^{\circ}\text{C}$ ;  $^1\text{H}$  NMR (400 MHz,  $\text{CDCl}_3$ )  $\delta$  7.46 (d,  $J$  = 8.7 Hz, 2H), 7.38 (s, 1H), 7.33 (d,  $J$  = 8.6 Hz, 2H), 7.19 (dd,  $J$  = 8.4, 7.6 Hz, 1H), 6.85 (dd,  $J$  = 8.4, 3.6 Hz, 1H), 6.78 (dd,  $J$  = 7.6, 2.6 Hz, 1H), 6.60 (dd,  $J$  = 2.6, 1.7 Hz, 1H), 3.77 (s, 3H);  $^{13}\text{C}$  NMR (101 MHz,  $\text{CDCl}_3$ )  $\delta$  158.72, 141.28, 140.57, 140.18, 133.39, 129.05, 128.91, 127.85, 120.04, 116.02, 114.16, 112.59, 55.27; HRMS (ESI)  $m/z$   $[\text{M} + \text{NH}_4]^+$  calculated for  $[\text{C}_{15}\text{H}_{16}\text{NClIO}_3\text{S}]^+$ : 451.9579; found: 451.9566.

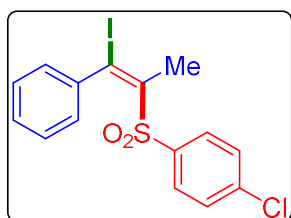

**(E)-1-chloro-4-((1-iodo-1-phenylprop-1-en-2-yl)sulfonyl)benzene (24):** Following general iodovinyl sulfonylation procedure using prop-1-yn-1-ylbenzene **1p** (93 mg, 0.704 mmol) and purified by silica gel column chromatography, eluting with hexanes afforded the title compound as yellow solid (188 mg, 0.451 mmol, 64%). Mp: 121-123  $^{\circ}\text{C}$ ;  $^1\text{H}$  NMR (400

MHz, CDCl<sub>3</sub>)  $\delta$  7.37 (d,  $J$  = 8.7 Hz, 2H), 7.30 (d,  $J$  = 8.7 Hz, 2H), 7.24-7.20 (m, 3H), 7.06 (dd,  $J$  = 7.6, 2.0 Hz, 2H), 2.55 (s, 3H); <sup>13</sup>C NMR (101 MHz, CDCl<sub>3</sub>)  $\delta$  143.99, 142.58, 139.75, 138.81, 129.05, 129.03, 128.83, 127.76, 127.70, 116.15, 26.82; HRMS (ESI)  $m/z$  [M + H]<sup>+</sup> calculated for [C<sub>15</sub>H<sub>13</sub>ClIO<sub>2</sub>S]<sup>+</sup>: 418.9364; found: 418.9365.

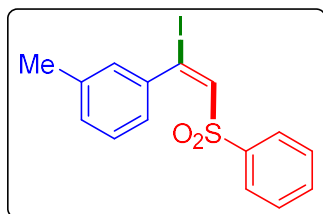

**(E)-1-(1-iodo-2-(phenylsulfonyl)vinyl)-3-methylbenzene (25):** Following general iodovinyl sulfonylation procedure using 1-ethynyl-3-methylbenzene **1b** (90 mg, 100  $\mu$ L, 0.775 mmol) and purified by silica gel column chromatography, eluting with hexanes afforded the title compound as white solid (187 mg, 0.488 mmol, 63%). <sup>1</sup>H NMR (400 MHz, CDCl<sub>3</sub>)  $\delta$  7.57-7.51 (m, 3H), 7.40-7.34 (m, 3H), 7.16 (t,  $J$  = 7.6 Hz, 1H), 7.09 (d,  $J$  = 7.6 Hz, 1H), 7.02 (d,  $J$  = 7.4 Hz, 1H), 6.90 (s, 1H), 2.26 (s, 3H); <sup>13</sup>C NMR (101 MHz, CDCl<sub>3</sub>)  $\delta$  140.92, 140.14, 139.36, 137.60, 133.27, 130.55, 128.80, 127.86, 127.79, 127.75, 124.66, 115.05, 21.20; the overall spectroscopic data are in complete agreement with assigned structures and consistent with literature.<sup>[5-7]</sup>

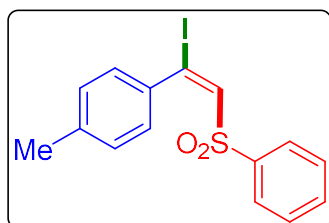

**(E)-1-(1-iodo-2-(phenylsulfonyl)vinyl)-4-methylbenzene (26):** Following general iodovinyl sulfonylation procedure using 1-ethynyl-4-methylbenzene **1c** (92 mg, 100  $\mu$ L, 0.789 mmol) and purified by silica gel column chromatography, eluting with hexanes afforded the title compound as yellow solid (182 mg, 0.473 mmol, 60%). <sup>1</sup>H NMR (400 MHz, CDCl<sub>3</sub>)  $\delta$  7.62-7.58 (m, 2H), 7.55 (t,  $J$  = 7.5 Hz, 1H), 7.42-7.37 (m, 2H), 7.33 (s, 1H), 7.14 (d,  $J$  = 8.3 Hz, 2H), 7.08 (d,  $J$  = 7.7 Hz, 2H), 2.35 (s, 3H); <sup>13</sup>C NMR (101 MHz, CDCl<sub>3</sub>)  $\delta$  140.50, 140.42, 140.20, 136.68, 133.40, 128.97, 128.64, 128.46, 127.72, 115.32, 21.37; the overall spectroscopic data are in complete agreement with assigned structures and consistent with literature.<sup>[5-7]</sup>

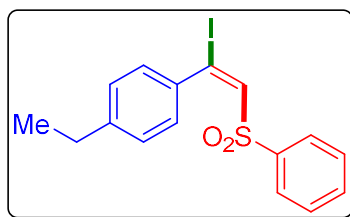

**(E)-1-ethyl-4-(1-iodo-2-(phenylsulfonyl)vinyl)benzene (27):** Following general iodovinyl sulfonylation procedure using 1-ethynyl-4-ethylbenzene **1d** (93 mg, 100  $\mu$ L, 0.715 mmol) and purified by silica gel column chromatography, eluting with hexanes afforded the title compound as white solid (211 mg, 0.529 mmol, 74%).  $^1\text{H}$  NMR (400 MHz,  $\text{CDCl}_3$ )  $\delta$  7.56 (d,  $J$  = 7.7 Hz, 2H), 7.51 (d,  $J$  = 7.4 Hz, 1H), 7.39-7.33 (m, 3H), 7.15 (d,  $J$  = 7.9 Hz, 2H), 7.08 (d,  $J$  = 8.0 Hz, 2H), 2.63 (q,  $J$  = 7.6 Hz, 2H), 1.24 (t,  $J$  = 7.7 Hz, 3H);  $^{13}\text{C}$  NMR (101 MHz,  $\text{CDCl}_3$ )  $\delta$  146.37, 140.53, 140.11, 136.75, 133.30, 128.80, 127.69, 127.31, 115.34, 28.60, 15.24; the overall spectroscopic data are in complete agreement with assigned structures and consistent with literature.<sup>[4]</sup>

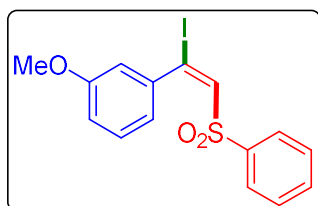

**(E)-1-(1-iodo-2-(phenylsulfonyl)vinyl)-3-methoxybenzene (28):** Following general iodovinyl sulfonylation procedure using 1-ethynyl-3-methoxybenzene **1f** (104 mg, 100  $\mu$ L, 0.787 mmol) and purified by silica gel column chromatography, eluting with hexanes afforded the title compound as a white solid (208 mg, 0.519 mmol, 66%).  $^1\text{H}$  NMR (400 MHz,  $\text{CDCl}_3$ )  $\delta$  7.60-7.52 (m, 3H), 7.41-7.36 (m, 3H), 7.20-7.15 (m, 1H), 6.86-6.79 (m, 2H), 6.67-6.65 (m, 1H), 3.76 (s, 3H);  $^{13}\text{C}$  NMR (101 MHz,  $\text{CDCl}_3$ )  $\delta$  158.84, 141.24, 140.47, 140.16, 138.56, 129.35, 129.14, 119.94, 115.95, 114.54, 112.60, 55.28; the overall spectroscopic data are in complete agreement with assigned structures and consistent with literature.<sup>[5]</sup>

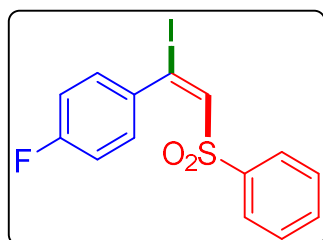

**(E)-1-fluoro-4-(1-iodo-2-(phenylsulfonyl)vinyl)benzene (29):** Following general iodovinyl sulfonylation procedure using 4-fluoro-2-ethynylbenzene **1g** (105 mg, 0.873 mmol) and purified by silica gel column chromatography, eluting with hexanes afforded the title compound as pale yellow solid (203 mg, 0.524 mmol, 60%).  $^1\text{H}$  NMR (400 MHz,  $\text{CDCl}_3$ )  $\delta$  7.55-7.48 (m, 3H), 7.36 (dd,  $J = 8.2, 7.4$  Hz, 2H), 7.31 (s, 1H), 7.20-7.15 (m, 2H), 6.90 (t,  $J = 8.6$  Hz, 2H);  $^{13}\text{C}$  NMR (101 MHz,  $\text{CDCl}_3$ )  $\delta$  163.18 (d,  $^1J_{\text{CF}} = 251.6$  Hz), 141.50, 140.10, 134.59 (d,  $^2J_{\text{CF}} = 193.2$  Hz), 130.07, 129.07, 127.73, 115.13 (dd,  $^3J_{\text{CF}} = 21.9, 7.4$  Hz), 114.98, 113.13; the overall spectroscopic data are in complete agreement with assigned structures and consistent with literature.<sup>[5-7]</sup>

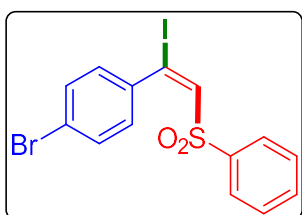

**(E)-1-bromo-4-(1-iodo-2-(phenylsulfonyl)vinyl)benzene (30):** Following general iodovinyl sulfonylation procedure using 4-bromo-2-ethynylbenzene **1h** (100 mg, 0.552 mmol) and purified by silica gel column chromatography, eluting with hexanes afforded the title compound as white solid (161 mg, 0.359 mmol, 65%).  $^1\text{H}$  NMR (400 MHz,  $\text{CDCl}_3$ )  $\delta$  7.53 (d,  $J = 7.0$  Hz, 2H), 7.43 (dd,  $J = 16.4, 6.9$  Hz, 5H), 7.36 (d,  $J = 1.4$  Hz, 1H), 7.13-7.08 (m, 2H).  $^{13}\text{C}$  NMR (101 MHz,  $\text{CDCl}_3$ )  $\delta$  141.13, 140.51, 138.38, 138.29, 131.22, 129.42, 129.23, 129.13, 124.40, 113.20; the overall spectroscopic data are in complete agreement with assigned structures and consistent with literature.<sup>[6,7]</sup>

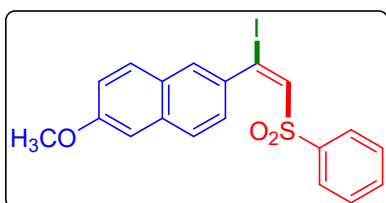

**(E)-2-(1-iodo-2-(phenylsulfonyl)vinyl)-6-methoxynaphthalene (31):** Following general iodovinyl sulfonylation procedure using 2-ethynyl-6-methoxynaphthalene **1m** (100 mg, 0.549 mmol) and purified by silica gel column chromatography, eluting with hexanes afforded the title compound as yellow solid (149 mg, 0.329 mmol, 60%). Mp: 108-110 °C;  $^1\text{H}$  NMR (400 MHz,  $\text{CDCl}_3$ )  $\delta$  7.69-7.63 (m, 2H), 7.58 (d,  $J = 8.6$  Hz, 1H), 7.52-7.42 (m, 4H), 7.26-7.22 (m, 2H), 7.18 (ddd,  $J = 8.9, 3.6, 2.2$  Hz, 2H), 7.09 (d,  $J = 2.5$  Hz, 1H), 3.93 (s, 3H);  $^{13}\text{C}$  NMR

(101 MHz,  $\text{CDCl}_3$ )  $\delta$  158.93, 141.08, 141.01, 140.92, 140.85, 140.21, 134.95, 134.35, 133.30, 130.11, 128.81, 128.72, 127.76, 127.37, 127.32, 126.55, 125.56, 125.45, 119.77, 119.66, 115.64, 105.78, 105.64, 55.36; HRMS (ESI)  $m/z$   $[\text{M} + \text{NH}_4]^+$  calculated for  $[\text{C}_{19}\text{H}_{19}\text{NIO}_3\text{S}]^+$ : 468.0125; found: 468.0112.

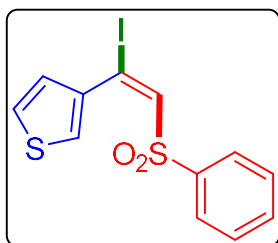

**(E)-3-(1-iodo-2-(phenylsulfonyl)vinyl)thiophene (32):** Following general iodo vinyl sulfonylation procedure using 3-ethynylthiophene **1n** (100 mg, 0.926 mmol) and purified by silica gel column chromatography, eluting with hexanes afforded the title compound as pale yellow semi solid (230 mg, 0.611 mmol, 66%).  $^1\text{H}$  NMR (400 MHz,  $\text{CDCl}_3$ )  $\delta$  7.64-7.57 (m, 3H), 7.54 (t,  $J = 7.5$  Hz, 1H), 7.43-7.36 (m, 3H), 7.19 (dd,  $J = 5.1, 3.1$  Hz, 1H), 6.92 (dd,  $J = 5.1, 1.4$  Hz, 1H);  $^{13}\text{C}$  NMR (101 MHz,  $\text{CDCl}_3$ )  $\delta$  141.12, 139.98, 138.63, 133.43, 128.89, 128.24, 127.53, 125.39, 107.96; the overall spectroscopic data are in complete agreement with assigned structures and consistent with literature.<sup>[1-3]</sup>

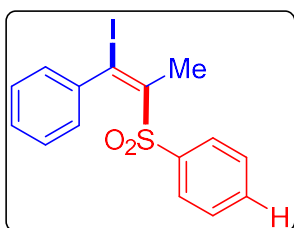

**(E)-1-((1-iodo-1-phenylprop-1-en-2-yl)sulfonyl)benzene (33):** Following general iodo vinyl sulfonylation procedure using prop-1-yn-1-ylbenzene **1p** (93 mg, 0.704 mmol) and purified by silica gel column chromatography, eluting with hexanes afforded the title compound as pale yellow solid (173 mg, 0.451 mmol, 64%).  $^1\text{H}$  NMR (400 MHz,  $\text{CDCl}_3$ )  $\delta$  7.51-7.46 (m, 3H), 7.36 (d,  $J = 7.3$  Hz, 2H), 7.22-7.18 (m, 3H), 7.09-7.06 (m, 2H), 2.53 (s, 3H);  $^{13}\text{C}$  NMR (101 MHz,  $\text{CDCl}_3$ )  $\delta$  143.85, 142.69, 140.20, 133.05, 128.74, 127.56, 116.03, 26.89; the overall spectroscopic data are in complete agreement with assigned structures and consistent with literature.<sup>[7]</sup>

**Representative Procedure for Vinyl sulfonylation:**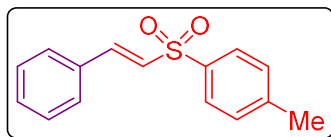

**(E)-1-methyl-4-(styrylsulfonyl)benzene (34):** A preformed solution of styrene **2a** (104 mg, 1.0 mmol, 1.0 equiv) in CH<sub>3</sub>CN (3 mL) was treated with 4-Methylphenyl sulfinic acid sodium salt (445 mg, 2.5 mmol, 2.5 equiv.) followed by Me<sub>3</sub>SI (306 mg, 1.5 mmol, 1.5 equiv) and PhI(OAc)<sub>2</sub> (483 mg, 1.5 mmol, 1.5 equiv) generating Me<sub>3</sub>SI(OAc)<sub>2</sub> *in-situ* at room temperature (25 °C). The resulting mixture was stirred under nitrogen atmosphere and irradiated with visible light (7 W Blue LED strips). Following the usual workup and purification by silica gel column chromatography using hexanes as eluent, the desired compound **34** was obtained as white solid (235 mg, 0.91 mmol, 91%). R<sub>f</sub> (4% EtOAc/Hexane) 0.5; <sup>1</sup>H NMR (400 MHz, CDCl<sub>3</sub>) δ 7.83 (d, *J* = 8.3 Hz, 2H), 7.65 (d, *J* = 15.4 Hz, 1H), 7.46 (d, *J* = 5.7 Hz, 2H), 7.40-7.31 (m, 5H), 6.87 (d, *J* = 15.4 Hz, 1H), 2.42 (s, 3H); <sup>13</sup>C NMR (101 MHz, CDCl<sub>3</sub>) δ 144.37, 141.90, 137.67, 132.40, 131.07, 129.94, 129.03, 128.49, 127.67, 127.55, 21.57; the overall spectroscopic data are in complete agreement with assigned structures and consistent with literature.<sup>[10-17]</sup>

**Procedure for Gram-scale synthesis of vinyl sulfone:**

A preformed solution of styrene **2a** (1.1 g, 10.576 mmol) in CH<sub>3</sub>CN (10 mL) was treated with 4-Methylphenyl sulfinic acid sodium salt (4.7 g, 26.44 mmol, 2.5 equiv.) followed by Me<sub>3</sub>SI (3.2 g, 15.865 mmol, 1.5 equiv) and PhI(OAc)<sub>2</sub> (5.1 g, 15.865 mmol, 1.5 equiv) generating Me<sub>3</sub>SI(OAc)<sub>2</sub> *in-situ* at room temperature (25 °C). The resulting mixture was stirred under nitrogen atmosphere and irradiated with visible light (7 W Blue LED). Following the usual workup and purification by silica gel column chromatography using hexanes as eluent, the desired compound **34** was obtained as white solid (3.4 g, 8.989 mmol, 85%). The overall spectroscopic data are in complete agreement with assigned structures and consistent with literature.<sup>[10-17]</sup>

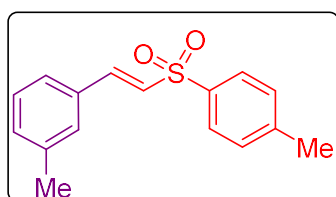

**(E)-1-methyl-3-(2-tosylvinyl)benzene (35):** Following general vinyl sulfonylation procedure using 1-methyl-3-vinylbenzene **2b** (90 mg, 0.762 mmol) and purified by silica gel column chromatography, eluting with hexanes afforded the title compound as dark yellow solid (126 mg, 0.465 mmol, 61%).  $^1\text{H}$  NMR (400 MHz,  $\text{CDCl}_3$ )  $\delta$  7.82 (d,  $J$  = 8.3 Hz, 2H), 7.62 (d,  $J$  = 15.4 Hz, 1H), 7.33 (d,  $J$  = 8.0 Hz, 2H), 7.27 (d,  $J$  = 5.3 Hz, 3H), 7.21 (d,  $J$  = 2.9 Hz, 1H), 6.84 (dd,  $J$  = 15.4, 2.5 Hz, 1H), 2.42 (s, 3H), 2.34 (s, 3H);  $^{13}\text{C}$  NMR (101 MHz,  $\text{CDCl}_3$ )  $\delta$  144.26, 142.03, 138.70, 137.69, 132.26, 131.86, 129.86, 129.00, 128.85, 127.58, 127.22, 125.68, 21.52, 21.16; the overall spectroscopic data are in complete agreement with assigned structures and consistent with literature.<sup>[11,13,16]</sup>

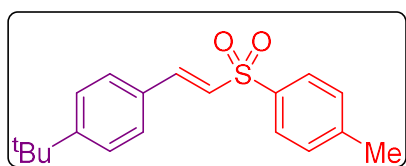

**(E)-1-(tert-butyl)-4-(2-tosylvinyl)sulfonylbenzene (36):** Following general vinyl sulfonylation procedure using 1-(tert-butyl)-4-vinylbenzene **2c** (90 mg, 0.562 mmol) and purified by silica gel column chromatography, eluting with hexanes afforded the title compound as white solid (109 mg, 0.348 mmol, 62%).  $^1\text{H}$  NMR (400 MHz,  $\text{CDCl}_3$ )  $\delta$  7.73 (d,  $J$  = 8.3 Hz, 2H), 7.56 (d,  $J$  = 15.4 Hz, 1H), 7.31 (d,  $J$  = 2.2 Hz, 4H), 7.22 (d,  $J$  = 7.9 Hz, 2H), 6.74 (d,  $J$  = 15.4 Hz, 1H), 2.32 (s, 3H), 1.20 (s, 9H);  $^{13}\text{C}$  NMR (101 MHz,  $\text{CDCl}_3$ )  $\delta$  154.68, 144.12, 141.77, 137.79, 129.80, 129.51, 128.29, 127.48, 126.44, 125.91, 34.81, 30.94, 21.47; the overall spectroscopic data are in complete agreement with assigned structures and consistent with literature.<sup>[11,13,14]</sup>

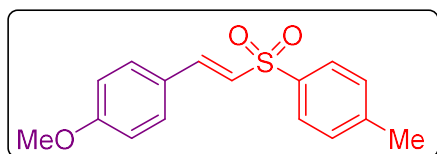

**(E)-1-methoxy-4-(2-tosylvinyl)sulfonylbenzene (37):** Following general vinyl sulfonylation procedure using 1-methoxy-4-vinylbenzene **2d** (100 mg, 0.746 mmol) and purified by silica gel column chromatography, eluting with hexanes afforded the title compound as pale yellow semi solid (146 mg, 0.507 mmol, 68%).  $^1\text{H}$  NMR (400 MHz,  $\text{CDCl}_3$ )  $\delta$  7.82 (d,  $J$  = 8.4 Hz, 2H), 7.62 (s, 1H), 7.42 (d,  $J$  = 9.0 Hz, 2H), 7.33 (d,  $J$  = 7.4 Hz, 2H), 6.89 (d,  $J$  = 8.9 Hz, 2H), 6.70 (d,  $J$  = 15.3 Hz, 1H), 3.83 (s, 3H), 2.43 (s, 3H);  $^{13}\text{C}$  NMR (101 MHz,  $\text{CDCl}_3$ )  $\delta$  161.93, 144.09, 141.69, 138.14, 130.26, 129.85, 127.51, 125.01, 124.76, 114.44, 55.38, 21.54; the

overall spectroscopic data are in complete agreement with assigned structures and consistent with literature.<sup>[10,16,17]</sup>

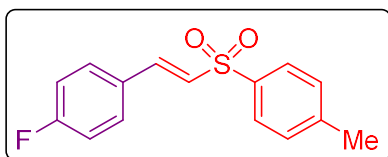

**(E)-1-fluoro-4-(2-tosylvinyl)sulfonylbenzene (38):** Following general vinyl sulfonylation procedure using 1-fluoro-4-vinylbenzene **2e** (100 mg, 0.819 mmol) and purified by silica gel column chromatography, eluting with hexanes afforded the title compound as white solid (140 mg, 0.508 mmol, 62%). <sup>1</sup>H NMR (400 MHz, CDCl<sub>3</sub>)  $\delta$  7.83 (d,  $J$  = 8.3 Hz, 2H), 7.62 (d,  $J$  = 15.4 Hz, 1H), 7.47 (dd,  $J$  = 8.8, 5.2 Hz, 2H), 7.34 (d,  $J$  = 8.0 Hz, 2H), 7.07 (t,  $J$  = 8.6 Hz, 2H), 6.82 (d,  $J$  = 15.4 Hz, 1H), 2.42 (s, 3H); <sup>13</sup>C NMR (101 MHz, CDCl<sub>3</sub>)  $\delta$  164.21 (d,  $^1J_{CF}$  = 252.8 Hz), 144.43, 140.54, 137.53, 130.53, 130.49 (d,  $^4J_{CF}$  = 8.7 Hz), 127.45 (d,  $^2J_{CF}$  = 36.6 Hz), 116.22 (d,  $^3J_{CF}$  = 22.1 Hz), 21.56; the overall spectroscopic data are in complete agreement with assigned structures and consistent with literature.<sup>[11-14,16]</sup>

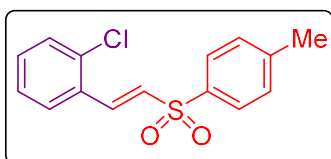

**(E)-1-chloro-2-(2-tosylvinyl)sulfonylbenzene (39):** Following general vinyl sulfonylation procedure using 1-chloro-2-vinylbenzene **2f** (110 mg, 0.797 mmol) and purified by silica gel column chromatography, eluting with hexanes afforded the title compound as white solid (152 mg, 0.518 mmol, 65%). <sup>1</sup>H NMR (400 MHz, CDCl<sub>3</sub>)  $\delta$  7.97 (d,  $J$  = 15.6 Hz, 1H), 7.77 (t,  $J$  = 7.2 Hz, 2H), 7.42 (d,  $J$  = 7.2 Hz, 1H), 7.34 (d,  $J$  = 7.4 Hz, 1H), 7.27 (q,  $J$  = 6.9 Hz, 3H), 7.18 (d,  $J$  = 7.3 Hz, 1H), 6.81 (d,  $J$  = 15.2 Hz, 1H), 2.36 (s, 3H); <sup>13</sup>C NMR (101 MHz, CDCl<sub>3</sub>)  $\delta$  144.57, 137.82, 137.28, 135.23, 131.78, 130.74, 130.34, 130.00, 128.17, 127.85, 127.16, 21.60; the overall spectroscopic data are in complete agreement with assigned structures and consistent with literature.<sup>[10,13,14]</sup>

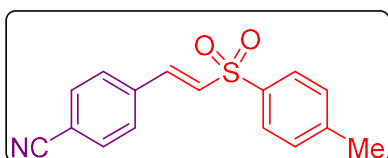



**(E)-4-(tosylvinyl)sulfonylbenzonitrile (40):** Following general vinyl sulfonylation procedure using 1-cyano-4-vinylbenzene **2g** (110 mg, 0.853 mmol) and purified by silica gel column chromatography, eluting with hexanes afforded the title compound as white solid (198 mg, 0.699 mmol, 82%).  $^1\text{H}$  NMR (400 MHz,  $\text{CDCl}_3$ )  $\delta$  7.78-7.73 (m, 2H), 7.57 (d,  $J$  = 17.6 Hz, 3H), 7.53-7.48 (m, 2H), 7.32-7.27 (m, 2H), 6.91 (dd,  $J$  = 15.5, 2.0 Hz, 1H), 2.37 (s, 3H);  $^{13}\text{C}$  NMR (101 MHz,  $\text{CDCl}_3$ )  $\delta$  144.94, 139.18, 136.78, 136.65, 132.68, 131.27, 130.09, 128.82, 127.83, 117.99, 114.09, 21.58; the overall spectroscopic data are in complete agreement with assigned structures and consistent with literature.<sup>[11,12,14,17]</sup>

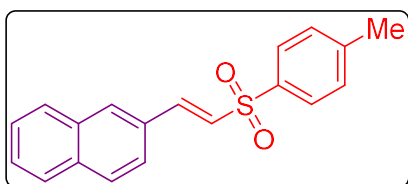

**(E)-2-(2-tosylvinyl)naphthalene (41):** Following general vinyl sulfonylation procedure using 2-vinylnaphthalene **2h** (100 mg, 0.649 mmol) and purified by silica gel column chromatography, eluting with hexanes afforded the title compound as white solid (128 mg, 0.415 mmol, 64%).  $^1\text{H}$  NMR (400 MHz,  $\text{CDCl}_3$ )  $\delta$  7.33-7.24 (m, 7H), 7.20-7.16 (m, 2H), 7.10 (d,  $J$  = 8.0 Hz, 2H), 7.02 (d,  $J$  = 8.3 Hz, 2H), 2.29 (s, 3H);  $^{13}\text{C}$  NMR (101 MHz,  $\text{CDCl}_3$ )  $\delta$  149.00, 144.23, 142.46, 139.30, 136.67, 130.23, 129.16, 128.96, 128.48, 128.29, 127.81, 127.31, 118.05, 21.59; the overall spectroscopic data are in complete agreement with assigned structures and consistent with literature.<sup>[12-14,16,17]</sup>

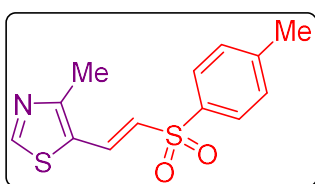

**(E)-4-methyl-5-(2-tosylvinyl)thiazole (42):** Following general vinyl sulfonylation procedure using 4-methyl-5-vinylthiazole **2i** (109 mg, 0.872 mmol) and purified by silica gel column chromatography, eluting with hexanes afforded the title compound as yellow solid (199 mg, 0.715 mmol, 82%). Mp: 122-124 °C;  $^1\text{H}$  NMR (400 MHz,  $\text{CDCl}_3$ )  $\delta$  8.74 (s, 1H), 7.85-7.77 (m, 3H), 7.36 (d,  $J$  = 8.2 Hz, 2H), 6.59 (d,  $J$  = 15.0 Hz, 1H), 2.59 (s, 3H), 2.44 (s, 3H);  $^{13}\text{C}$  NMR (101 MHz,  $\text{CDCl}_3$ )  $\delta$  157.19, 153.72, 144.53, 137.28, 131.02, 129.95, 128.37, 127.61, 126.01, 21.51, 15.62; HRMS (ESI)  $m/z$   $[\text{M} + \text{H}]^+$  calculated for  $[\text{C}_{13}\text{H}_{14}\text{NO}_2\text{S}_2]^+$ : 280.0460; found: 280.0461.

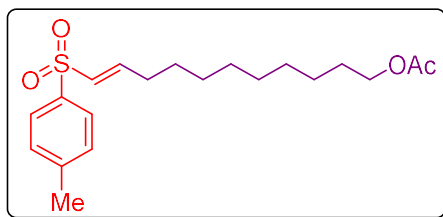

**(E)-11-tosylundec-10-en-1-yl acetate (43):** Following general vinyl sulfonylation procedure using undec-10-en-1-yl acetate **2j** (100 mg, 0.505 mmol) and purified by silica gel column chromatography, eluting with hexanes afforded the title compound as pale-yellow liquid (140 mg, 0.384 mmol, 76%).  $^1\text{H}$  NMR (400 MHz,  $\text{CDCl}_3$ )  $\delta$  7.75 (dd,  $J = 8.4, 2.1$  Hz, 2H), 7.37-7.30 (m, 2H), 7.01-6.89 (m, 1H), 6.30 (dd,  $J = 15.1, 1.6$  Hz, 1H), 4.04 (td,  $J = 6.8, 2.2$  Hz, 2H), 2.43 (d,  $J = 2.4$  Hz, 3H), 2.26-2.17 (m, 2H), 2.04 (d,  $J = 2.4$  Hz, 3H), 1.60 (dd,  $J = 10.4, 4.2$  Hz, 2H), 1.50-1.39 (m, 2H), 1.26 (s, 10H);  $^{13}\text{C}$  NMR (101 MHz,  $\text{CDCl}_3$ )  $\delta$  171.15, 146.54, 144.05, 137.64, 130.44, 129.75, 127.47, 64.47, 31.31, 29.17, 29.04, 29.02, 28.86, 28.43, 27.43, 25.73, 21.48, 20.92; HRMS (ESI)  $m/z$   $[\text{M} + \text{H}]^+$  calculated for  $[\text{C}_{20}\text{H}_{31}\text{O}_4\text{S}]^+$ : 367.1938; found: 367.1938.

**D. Mechanistic Studies and spectroscopic data.**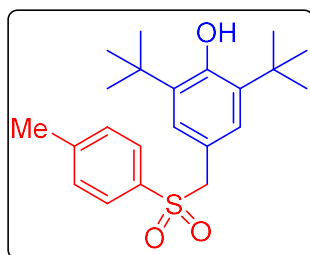

**2,6-di-tert-butyl-4-(tosylmethyl)phenol (44):** A preformed solution of  $\text{PhI}(\text{OAc})_2$  (646 mg, 2.006 mmol, 2.2 equiv.),  $\text{Me}_3\text{SI}$  (409 mg, 2.006 mmol, 2.2 equiv.),  $p\text{-TsNa}$  (487 mg, 2.735 mmol, 3.0 equiv.) and BHT (802 mg, 3.647 mmol, 4.0 equiv.) dissolved in 5 mL of  $\text{MeCN}:\text{AcOH}$  in 2:1 ratio, was treated with *phenyl acetylene* (**1a**) (93 mg, 100  $\mu\text{L}$ , 0.912 mmol, 1.0 equiv.) at room temperature. The mixture was stirred under nitrogen atmosphere and irradiated with visible light (7 W Blue LED strips). The distance between the light source and the reaction flask was approximately 3-4 cm, resulted in the temperature increasing up to 35  $^\circ\text{C}$ . For safety reasons, the reaction was carried out behind an antiblast shield. The reaction was stirred until the completion of starting material, typically for 15 h (adjudged by TLC). The reaction mixture was diluted with DCM (10 mL), quenched with saturated  $\text{NaHCO}_3$  (5 mL) and saturated aqueous sodium thiosulfate (2 mL) and extracted with DCM ( $3 \times 30$  mL). The combined organic layers were washed with brine solution, dried over anhydrous  $\text{Na}_2\text{SO}_4$ , concentrated *in vacuo* and purified by silica gel column chromatography using hexanes as eluent to afford the compound **44** as white solid (246 mg, 0.657 mmol, 72%).  $R_f$  (10%  $\text{EtOAc}$ ) 0.5; Mp: 133-135  $^\circ\text{C}$ ; IR (Film): 3565, 2958, 1745, 1431, 1292, 1229, 1138, 887, 790, 755, 636, 518  $\text{cm}^{-1}$ ;  $^1\text{H}$  NMR (400 MHz,  $\text{CDCl}_3$ )  $\delta$  7.44 (d,  $J = 8.3$  Hz, 2H), 7.29-7.15 (m, 2H), 6.73 (s, 2H), 5.27 (d,  $J = 21.2$  Hz, 1H), 4.19 (s, 2H), 2.41 (s, 3H), 1.32 (s, 18H);  $^{13}\text{C}$  NMR (101 MHz,  $\text{CDCl}_3$ )  $\delta$  154.15, 144.29, 135.90, 134.81, 129.25, 128.85, 127.62, 118.86, 63.19, 34.06, 29.98, 21.50; HRMS (ESI)  $m/z$   $[\text{M} + \text{NH}_4]^+$  calculated for  $[\text{C}_{22}\text{H}_{34}\text{NO}_3\text{S}]^+$ : 392.2254; found: 392.2256.

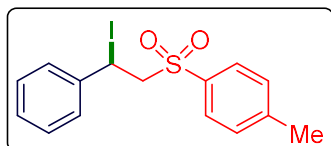

**(R)-1-((2-iodo-2-phenylethyl)sulfonyl)-4-methylbenzene (45):** A preformed solution of styrene **2a** (91 mg, 100  $\mu\text{L}$ , 0.871 mmol, 1.0 equiv) in  $\text{CH}_3\text{CN}:\text{AcOH}$  (2:1; 3 mL) was treated

with 4-Methylphenyl sulfinic acid sodium salt (233 mg, 1.306 mmol, 1.5 equiv.) followed by  $\text{Me}_3\text{SI}$  (215 mg, 1.045 mmol, 1.2 equiv) and  $\text{PhI}(\text{OAc})_2$  (337 mg, 1.045 mmol, 1.2 equiv) generating  $\text{Me}_3\text{SI}(\text{OAc})_2$  *in-situ* at room temperature (25 °C). The resulting mixture was stirred under nitrogen atmosphere and irradiated with visible light (7 W Blue LED strips). Following the usual workup and purification by silica gel column chromatography using hexanes as eluent, the desired compound **45** was obtained as white solid (222 mg, 0.575 mmol, 66%). Rf (4% EtOAc/Hexane) 0.5;  $^1\text{H}$  NMR (400 MHz,  $\text{CDCl}_3$ )  $\delta$  7.85-7.77 (m, 2H), 7.35 (d,  $J$  = 8.0 Hz, 2H), 7.32-7.21 (m, 5H), 5.27-5.21 (m, 1H), 3.47 (dd,  $J$  = 14.4, 10.0 Hz, 1H), 3.30 (dd,  $J$  = 14.3, 1.8 Hz, 1H), 2.44 (s, 3H);  $^{13}\text{C}$  NMR (101 MHz,  $\text{CDCl}_3$ )  $\delta$  145.07, 140.66, 136.00, 129.92, 128.56, 128.10, 127.86, 125.53, 68.30, 63.78, 21.51; the overall spectroscopic data are in complete agreement with assigned structures and consistent with literature.<sup>[18,19]</sup>

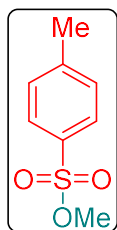

**Methyl-4-methylbenzene sulfonate (46):** A preformed solution of styrene **2a** (91 mg, 100  $\mu\text{L}$ , 0.871 mmol) in MeOH (3 mL) was treated with 4-Methylphenyl sulfinic acid sodium salt (388 mg, 2.178 mmol, 2.5 equiv.) followed by  $\text{Me}_3\text{SI}$  (266 mg, 1.3067 mmol, 1.5 equiv) and  $\text{PhI}(\text{OAc})_2$  (421 mg, 1.3067 mmol, 1.5 equiv) generating  $\text{Me}_3\text{SI}(\text{OAc})_2$  *in-situ* at room temperature (25 °C). The resulting mixture was stirred under nitrogen atmosphere and irradiated with visible light (7 W Blue LED strips). Following the usual workup and purification by silica gel column chromatography using hexanes as eluent, the desired compound **46** was obtained as white solid (110 mg, 0.592 mmol, 68%). Rf (4% EtOAc/Hexane) 0.5;  $^1\text{H}$  NMR (400 MHz,  $\text{CDCl}_3$ ) 7.69 (d,  $J$  = 8.3 Hz, 2H), 7.30-7.24 (m, 2H), 3.63 (s, 3H), 2.35 (s, 3H).

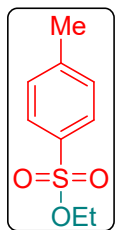

**Ethyl-4-methylbenzene sulfonate (47):** A preformed solution of styrene **2a** (91 mg, 100  $\mu$ L, 0.871 mmol) in EtOH (3 mL) was treated with 4-Methylphenyl sulfinic acid sodium salt (388 mg, 2.178 mmol, 2.5 equiv.) followed by Me<sub>3</sub>SI (266 mg, 1.3067 mmol, 1.5 equiv) and PhI(OAc)<sub>2</sub> (421 mg, 1.3067 mmol, 1.5 equiv) generating Me<sub>3</sub>SI(OAc)<sub>2</sub> *in-situ* at room temperature (25 °C). The resulting mixture was stirred under nitrogen atmosphere and irradiated with visible light (7 W Blue LED strips). Following the usual workup and purification by silica gel column chromatography using hexanes as eluent, the desired compound **47** was obtained as white solid (157 mg, 0.784 mmol, 90%). R<sub>f</sub> (4% EtOAc/Hexane) 0.5; <sup>1</sup>H NMR (400 MHz, CDCl<sub>3</sub>)  $\delta$  7.68 (d, *J* = 8.1 Hz, 2H), 7.25 (d, *J* = 8.0 Hz, 2H), 3.99 (q, *J* = 7.1 Hz, 2H), 2.34 (s, 3H), 1.18 (t, *J* = 7.1 Hz, 3H).

## E. References for Supporting Information.

1. Y. Hou, L. Zhu, H. Hu, S. Chen, Z. Li, Y. Liu and P. Gong, *New J. Chem.*, 2018, **42**, 8752-8755. **Iodine promoted iodosulfonylation of alkynes with sulfonyl hydrazides in an aqueous medium: highly stereoselective synthesis of (*E*)- $\beta$ -iodo vinylsulfones.**
2. L. Kadari, R. K. Palakodety and L. P. Yallapragada, *Org. Lett.*, 2017, **19**, 2580-2583. **iodine-catalyzed facile approach to sulfones employing TosMIC as a sulfonylating agent.**
3. Y. Sun, A. Abdukader, D. Lu, H. Zhang and C. Liu, *Green Chem.*, 2017, **19**, 1255-1258. **Synthesis of (*E*)- $\beta$ -iodo vinylsulfones via iodine promoted iodosulfonylation of alkynes with sodium sulfinates in an aqueous medium at room temperature.**
4. C. Tong, B. Gan, Y. Yan and Y.-Y. Xie, *Synthetic Communications* 2017, **47**, 1927–1933. **TBAI/K<sub>2</sub>S<sub>2</sub>O<sub>8</sub>-facilitated reaction of sulfonylhydrazides with alkynes: Facile synthesis of (*E*)- $\beta$ -iodovinyl sulfones.**
5. L. Yang, D. Hu, L. Wei and Y. Liu, *Phosphorus, Sulfur, And Silicon*, 2017, **192**, 1301-1304. **KI as iodine source for the synthesis of *E*-iodovinyl sulfones via metal-free iodosulfonylation of terminal alkynes.**
6. J.-P. Wan, D. Hu, F. Bai, L. Wei and Y. Liu, *RSC Adv.*, 2016, **6**, 73132-73135. **Stereoselective *Z*-halosulfonylation of terminal alkynes using sulfonohydrazides and CuX (X = Cl, Br, I).**
7. W. Wei, J. Wen, D. Yang, H. Jing, J. You and H. Wang, *RSC Adv.*, 2015, **5**, 4416-4419. **Direct difunctionalization of alkynes with sulfinic acids and molecular iodine: a simple and convenient approach to (*E*)- $\beta$ -iodovinyl sulfones.**
8. Y. Gao, W. Wu, Y. Huang, K. Huang and H. Jiang, *Org. Chem. Front.*, 2014, **1**, 361-364. **NBS-promoted halosulfonylation of terminal alkynes: highly regio- and stereoselective.**
9. T. Sawangphon, P. Katrun, K. Chaisiwamongkhol, M. Pohmakotr, V. Reutrakul, T. Jaipetch, D. Soorukram and C. Kuhakarn, *Synthetic Communications*, 2013, **43**, 1692-1707. **An improved synthesis of vinyl- and  $\beta$ -iodovinyl sulfones by a molecular iodine-mediated one-pot iodosulfonation-dehydroiodination reaction.**
10. P. Katrun, S. Chiampanichayakul, K. Korworapan, M. Pohmakotr, V. Reutrakul, T. Jaipetch and C. Kuhakarn, *Eur. J. Org. Chem.* **2010**, 5633-5641. **PhI(OAc)<sub>2</sub>/KI-**

- mediated reaction of aryl Sulfinates with alkenes, alkynes, and  $\alpha$ ,  $\beta$ -unsaturated carbonyl compounds: synthesis of vinyl sulfones and  $\beta$ -iodovinyl sulfones.
11. D. Hu, Y. Zhang, J. Li, K. Liang, and C. Xia, *Chem. Commun.*, 2023, **59**, 462-465. **Water-mediated radical C–H tosylation of alkenes with tosyl cyanide.**
  12. P.-L. Wang, H. Gao, Z.-S. Jiang, C. Li, Z.-A. Tian and P.-H. Li, *Synlett* 2020, **31**, 1720-1724. **Electrochemical synthesis of vinyl sulfones by sulfonylation of styrenes with a catalytic amount of potassium iodide.**
  13. X.-Q. Chu, D. Ge, T.-P. Loh and Z.-L. Shen, *Org. Chem. Front.* 2019, **6**, 835-840. **Oxidant-directed chemoselective sulfonylation and sulfonyloximation of alkenes via cleaving C-S bond in TosMIC.**
  14. G. Rong, J. Mao, H. Yan, Y. Zheng and G. Zhang, *J. Org. Chem.* 2015, **80**, 4697-4703. **Iron/copper Co-catalyzed synthesis of vinyl sulfones from sulfonyl hydrazides and alkyne derivatives.**
  15. **Generation of  $\beta$ -halo vinylsulfones through a multicomponent reaction with insertion of sulfur dioxide.** Y.; Xiang, Kuang, Y.; Wu, J. *Chem. Eur. J.* 2017, **23**, 6996-6999.
  16. Y.-L. Lai, Y. Mo, S. Yan, S. Zhang, L. Zhu, J. Luo, H. Guo, J. Cai, and J. Liao, *RSC Adv.*, 2020, **10**, 33155-33160. **Electrochemical sulfonylation of alkenes with sulfonyl hydrazides: a metal- and oxidant-free protocol for the synthesis of (*E*)-vinyl sulfones in water.**
  17. M. Pramanik, K. Choudhuri and P. Mal, *Asian J. Org. Chem.* **2019**, **8**, 144-150. **N-Iodosuccinimide as Bifunctional Reagent in (*E*)-Selective C(sp<sup>2</sup>)-H Sulfonylation of Styrenes.**
  18. L. Lin, Z. Yang, J. Liu, J. Wang, J. Zheng, J.-L. Li, X. Zhang, X.-W. Liu, H. Jiang and J. Li, *Green Chem.*, 2021, **23**, 5467-5473. **Visible-light-induced surfactant-promoted sulfonylation of alkenes and alkynes with sulfonyl chloride by the formation of an EDA-complex with NaI in water at room temperature.**
  19. K. Sun, Y. Lv, Z. Zhu, Y. Jiang, J. Qi, H. Wu, Z. Zhang, G. Zhang and X. Wang, *RSC Adv.*, **2015**, **5**, 50701-50704. **A convenient access to  $\beta$ -iodo sulfone by the iodine-mediated iodosulfonylation of alkenes.**

F.  $^1\text{H}$  and  $^{13}\text{C}$  NMR Spectra. $^1\text{H}$  NMR Spectrum of compound **4a** in  $\text{CDCl}_3$ 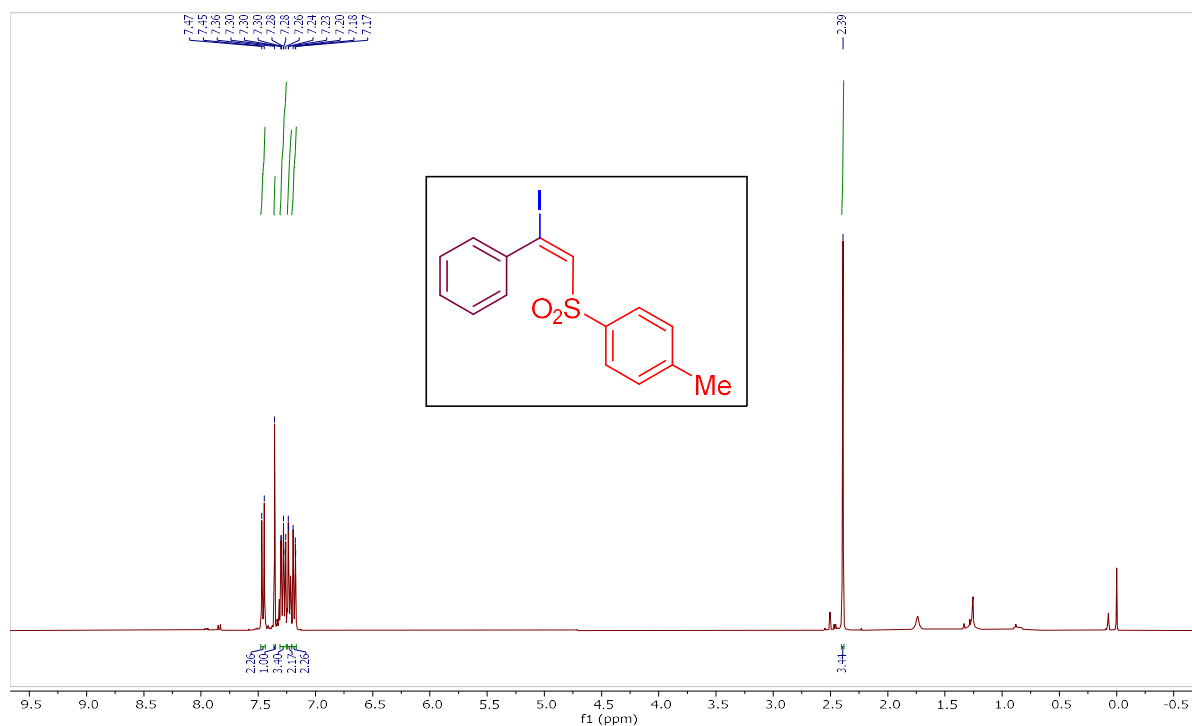 $^{13}\text{C}$  NMR Spectrum of compound **4a** in  $\text{CDCl}_3$ 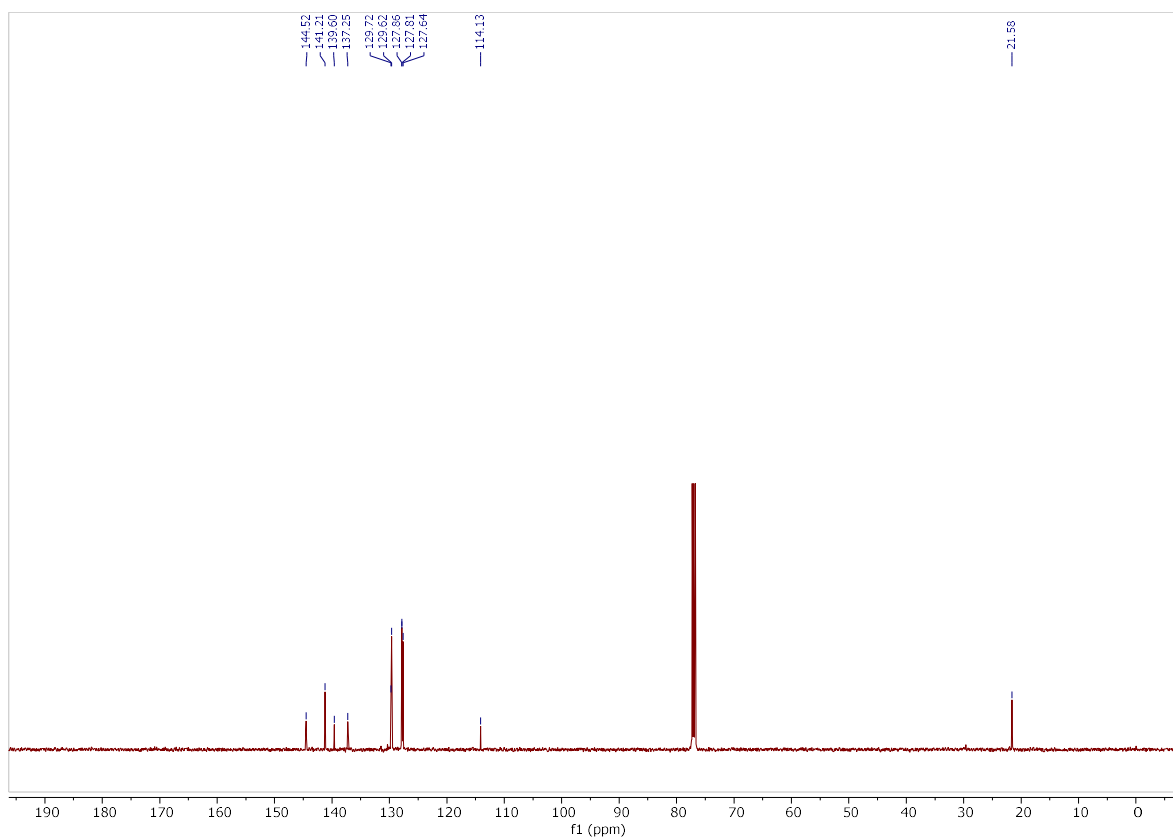



$^1\text{H}$ -NMR Spectrum of compound **4b** in  $\text{CDCl}_3$ 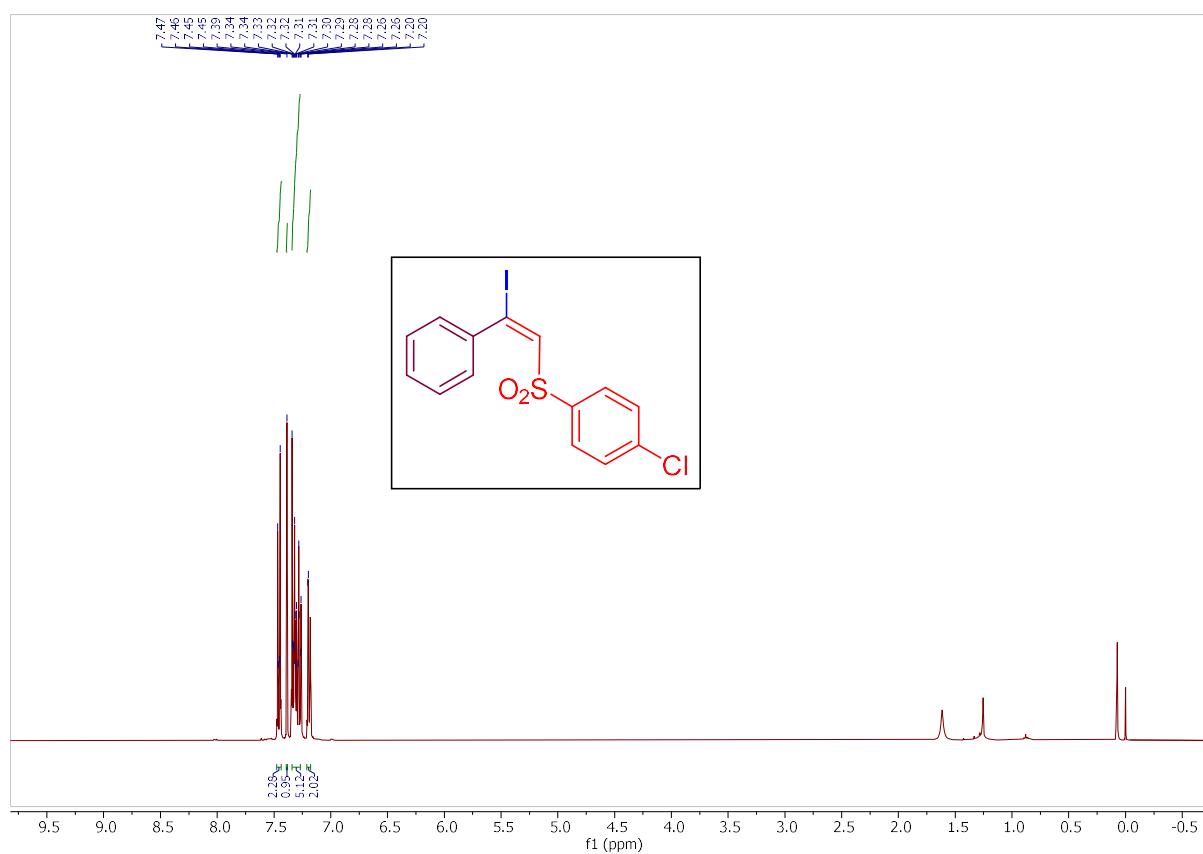 $^{13}\text{C}$ -NMR Spectrum of compound **4b** in  $\text{CDCl}_3$ 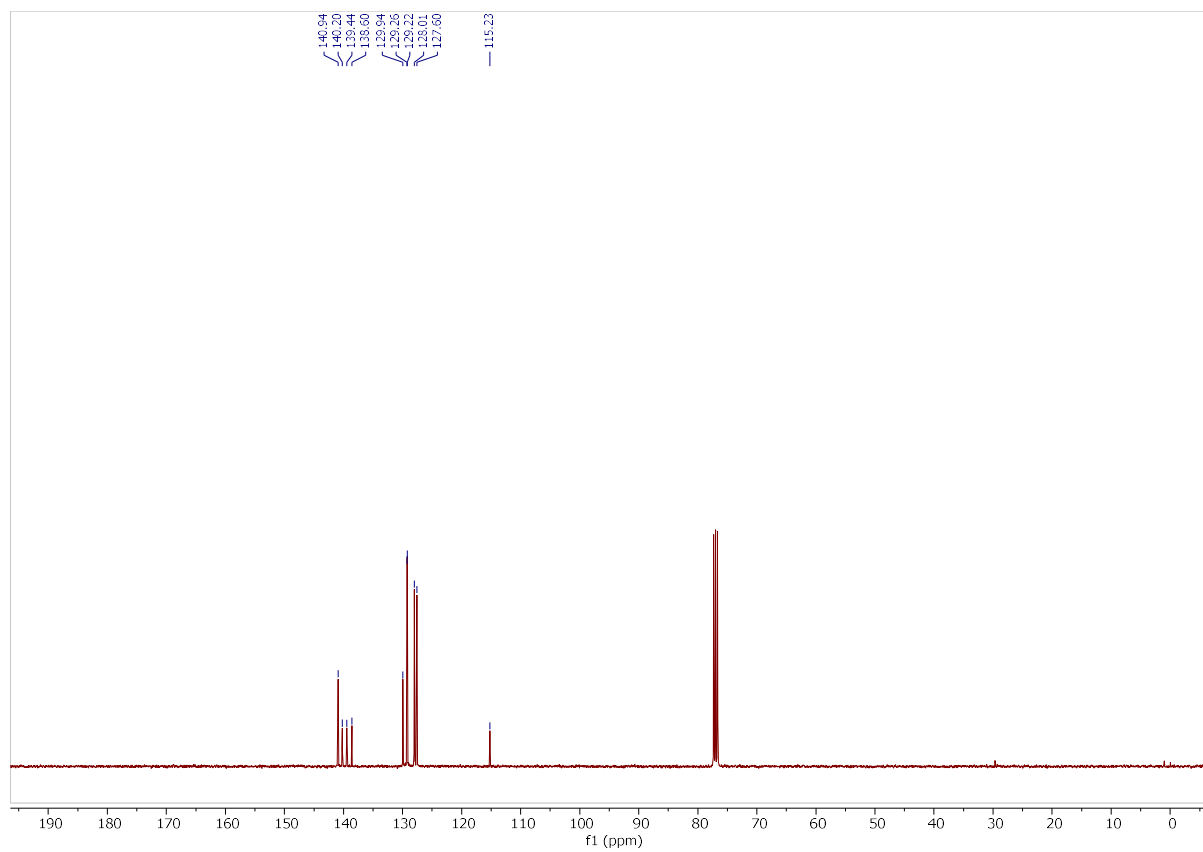

$^1\text{H}$  NMR Spectrum of compound **4c** in  $\text{CDCl}_3$ 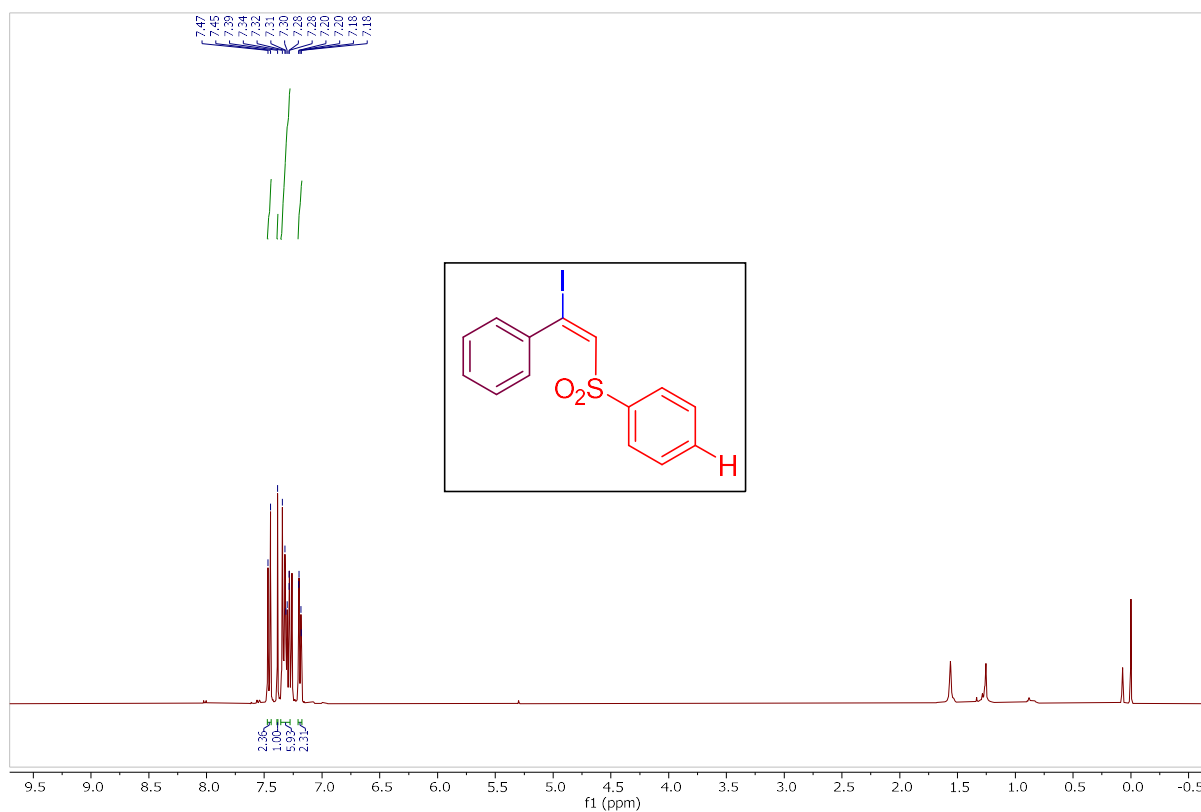 $^{13}\text{C}$  NMR Spectrum of compound **4c** in  $\text{CDCl}_3$ 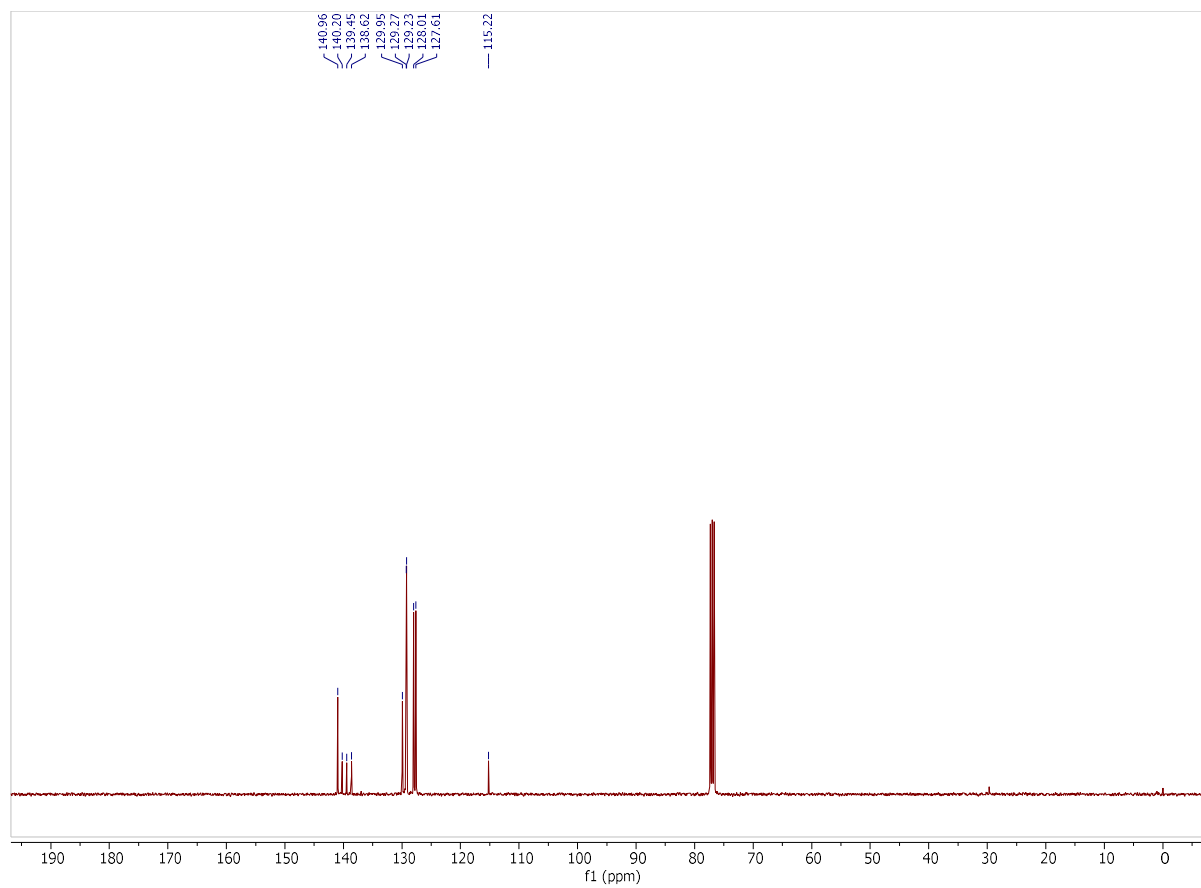

$^1\text{H}$ -NMR Spectrum of compound **5** in  $\text{CDCl}_3$ 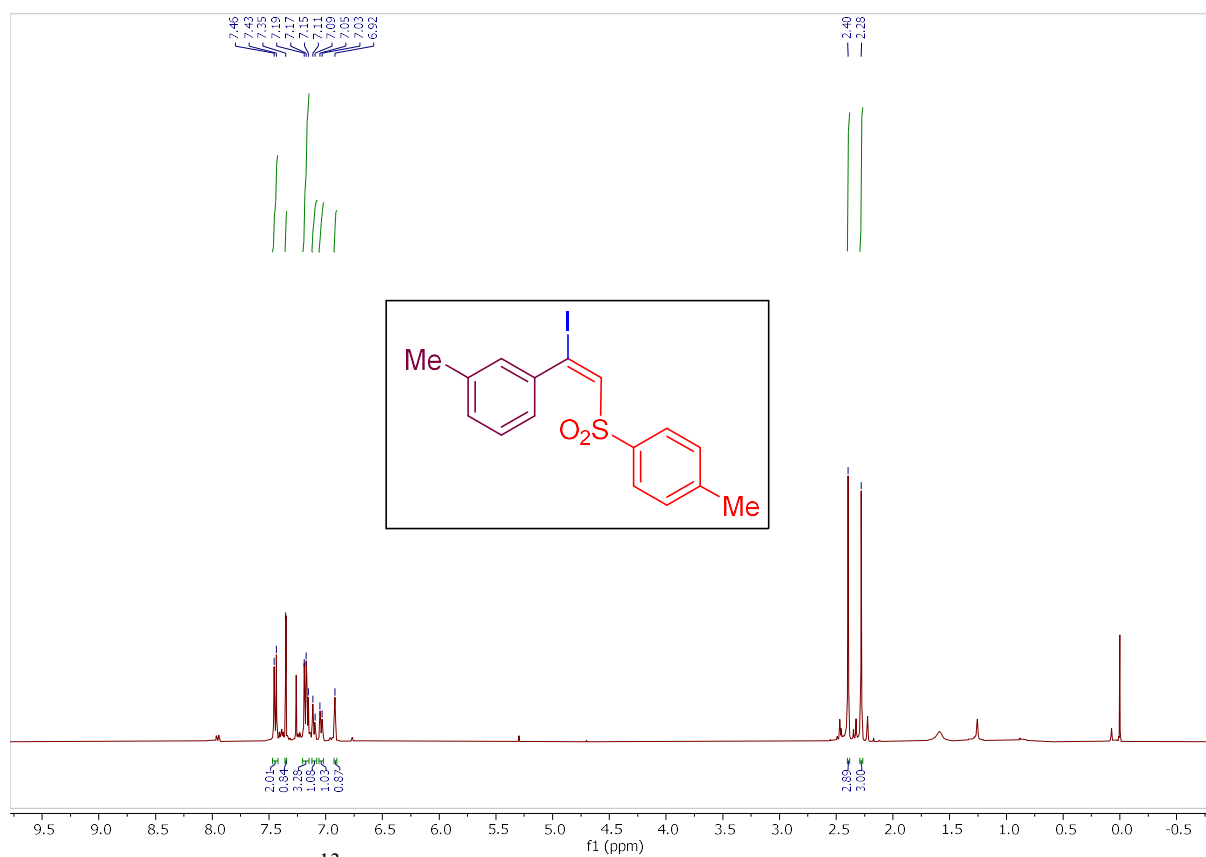 $^{13}\text{C}$ -NMR Spectrum of compound **5** in  $\text{CDCl}_3$ 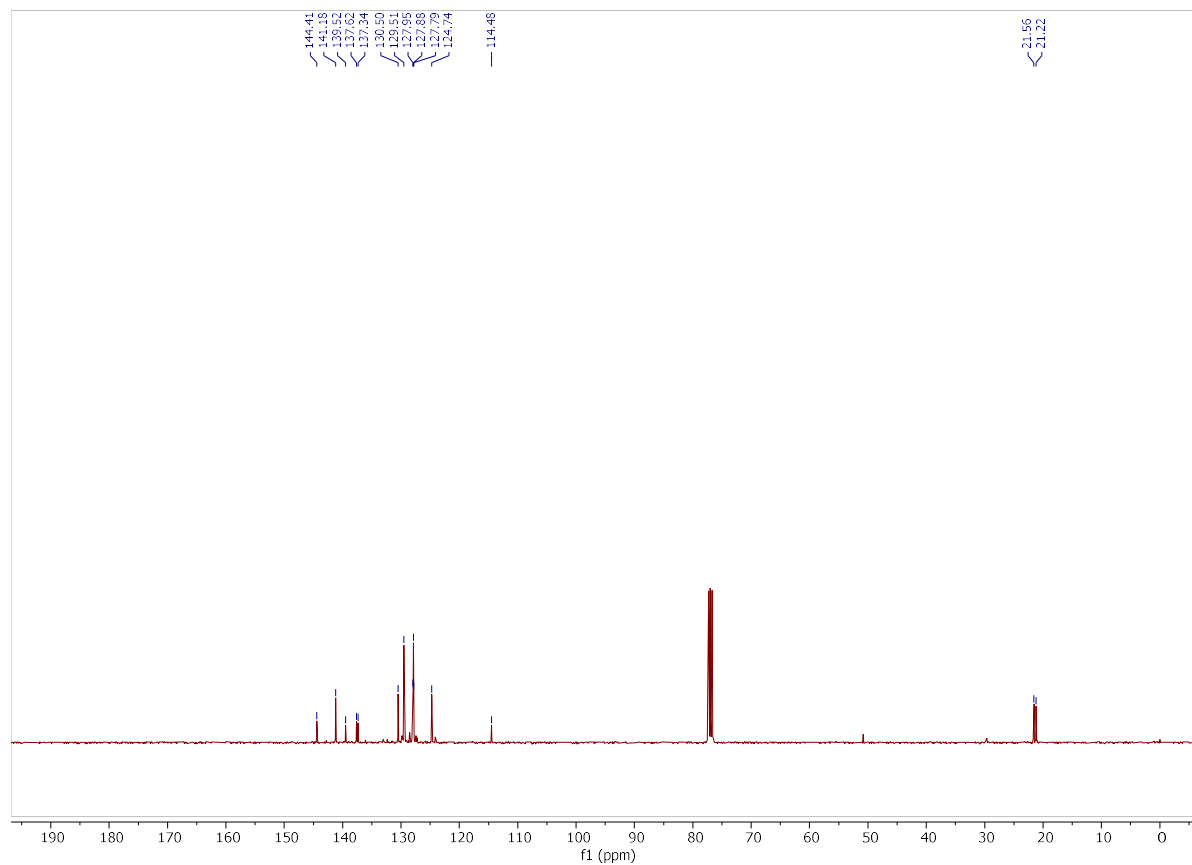

<sup>1</sup>H-NMR Spectrum of compound **6** in CDCl<sub>3</sub>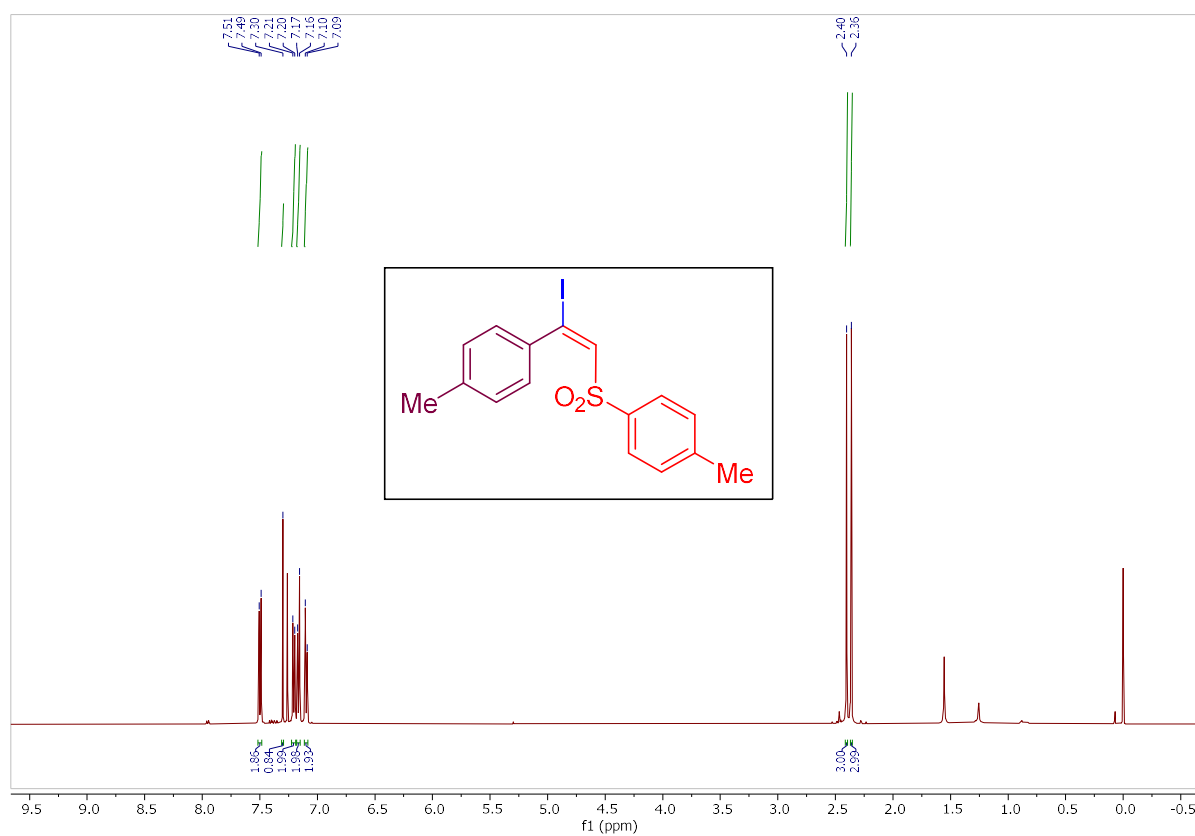<sup>13</sup>C-NMR Spectrum of compound **6** in CDCl<sub>3</sub>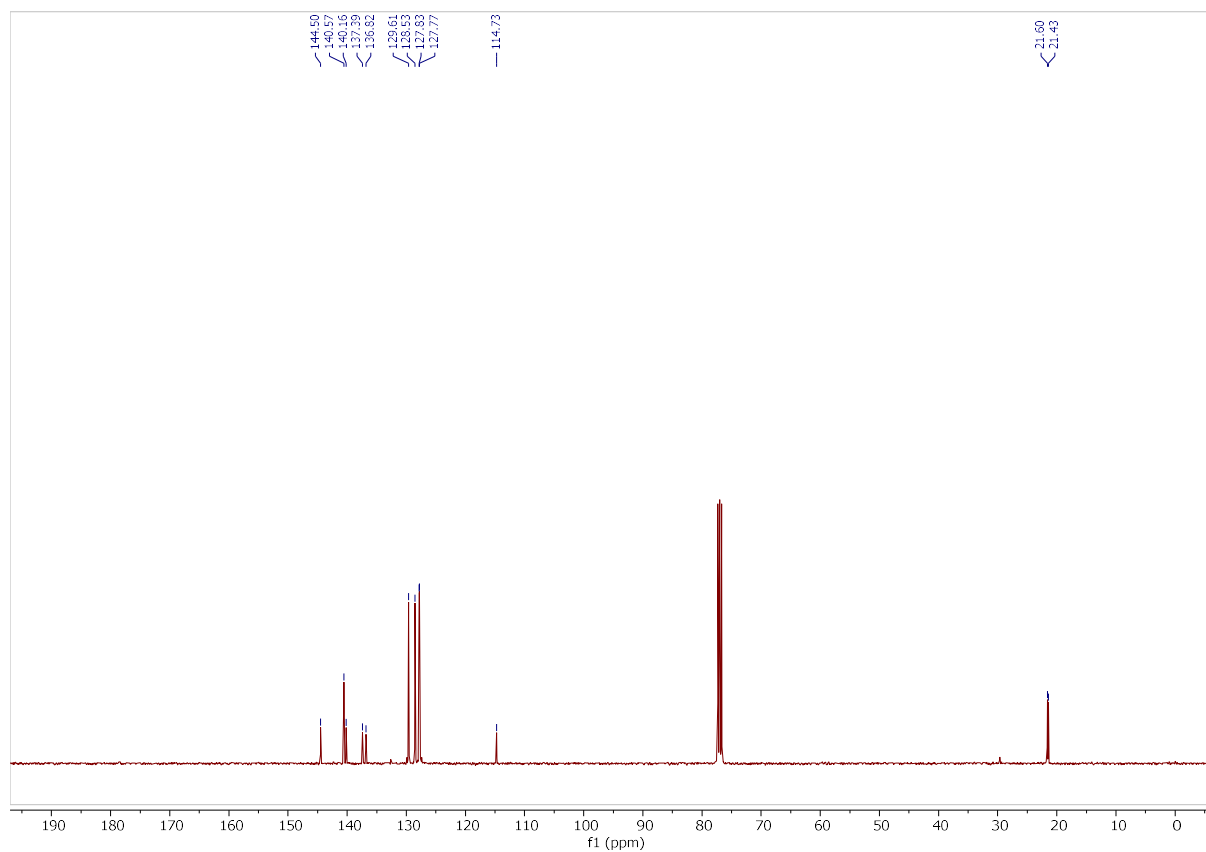

<sup>1</sup>H-NMR Spectrum of compound **7** in CDCl<sub>3</sub>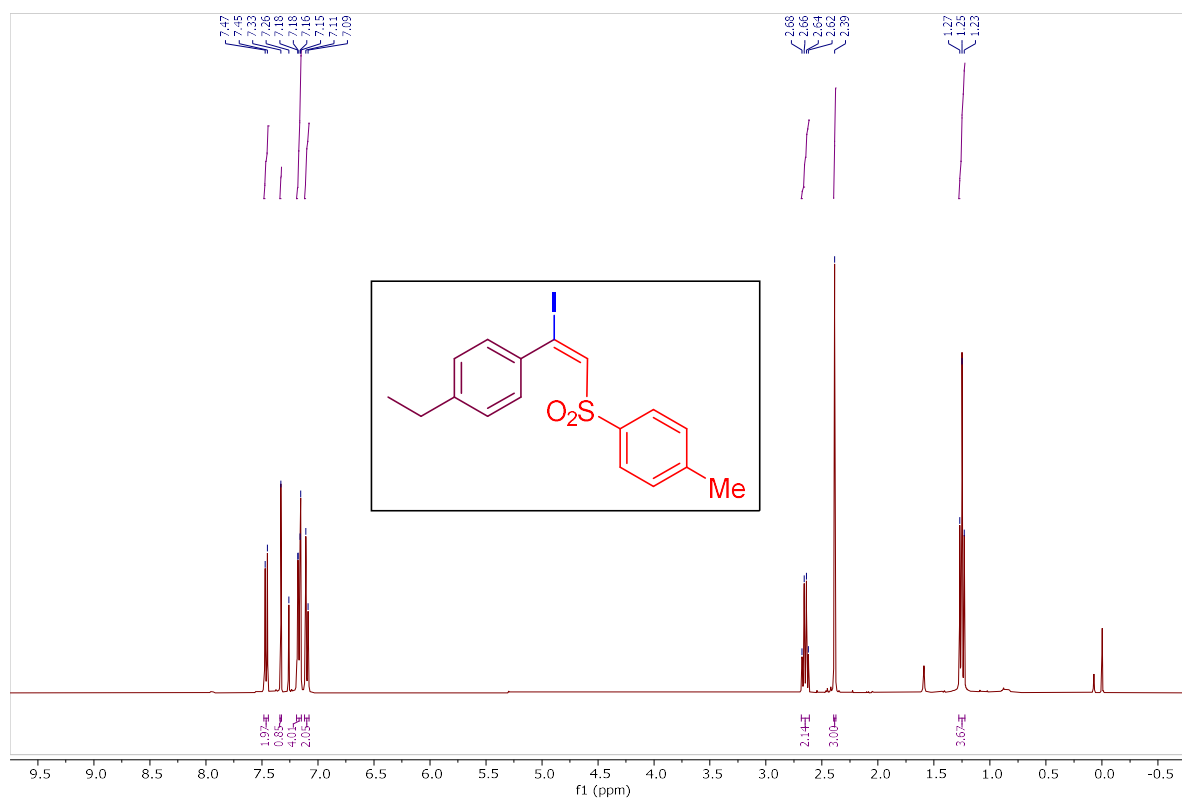<sup>13</sup>C-NMR Spectrum of compound **7** in CDCl<sub>3</sub>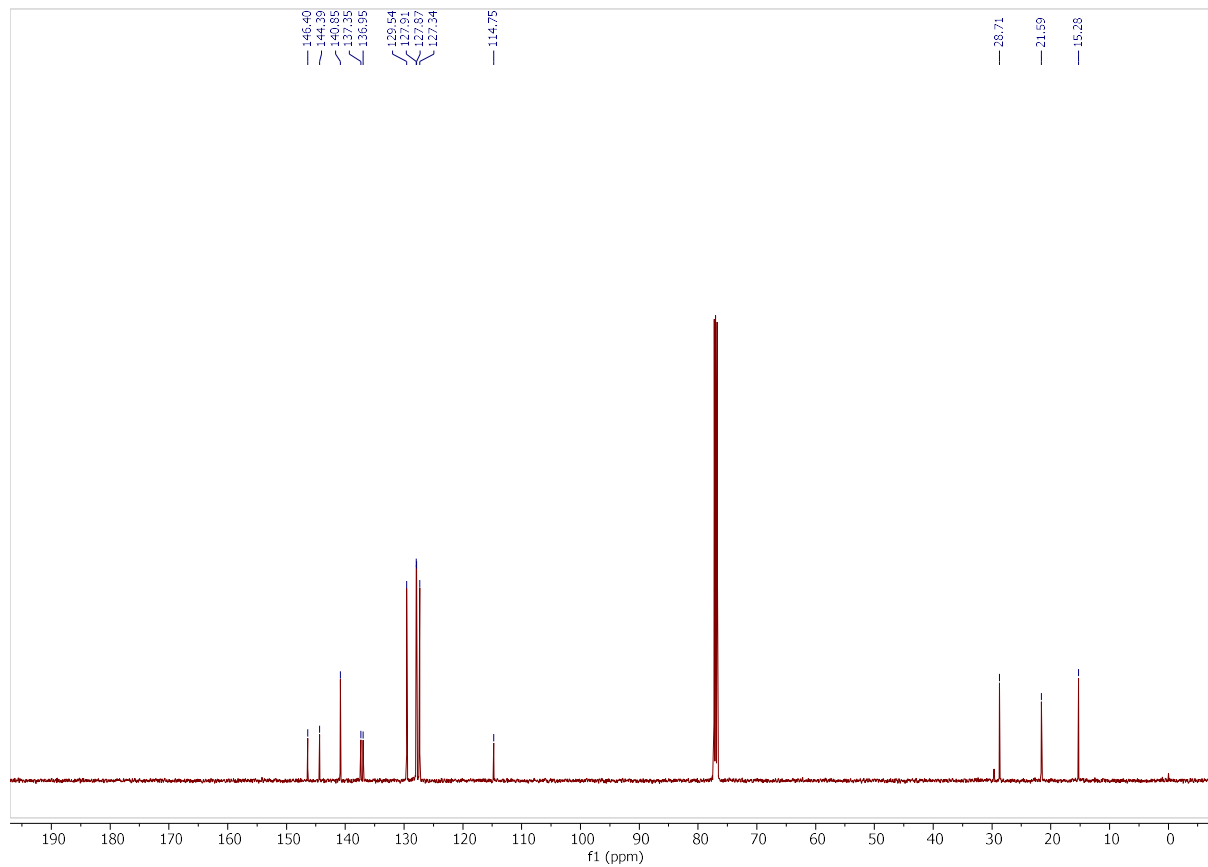

<sup>1</sup>H-NMR Spectrum of compound **8** in CDCl<sub>3</sub>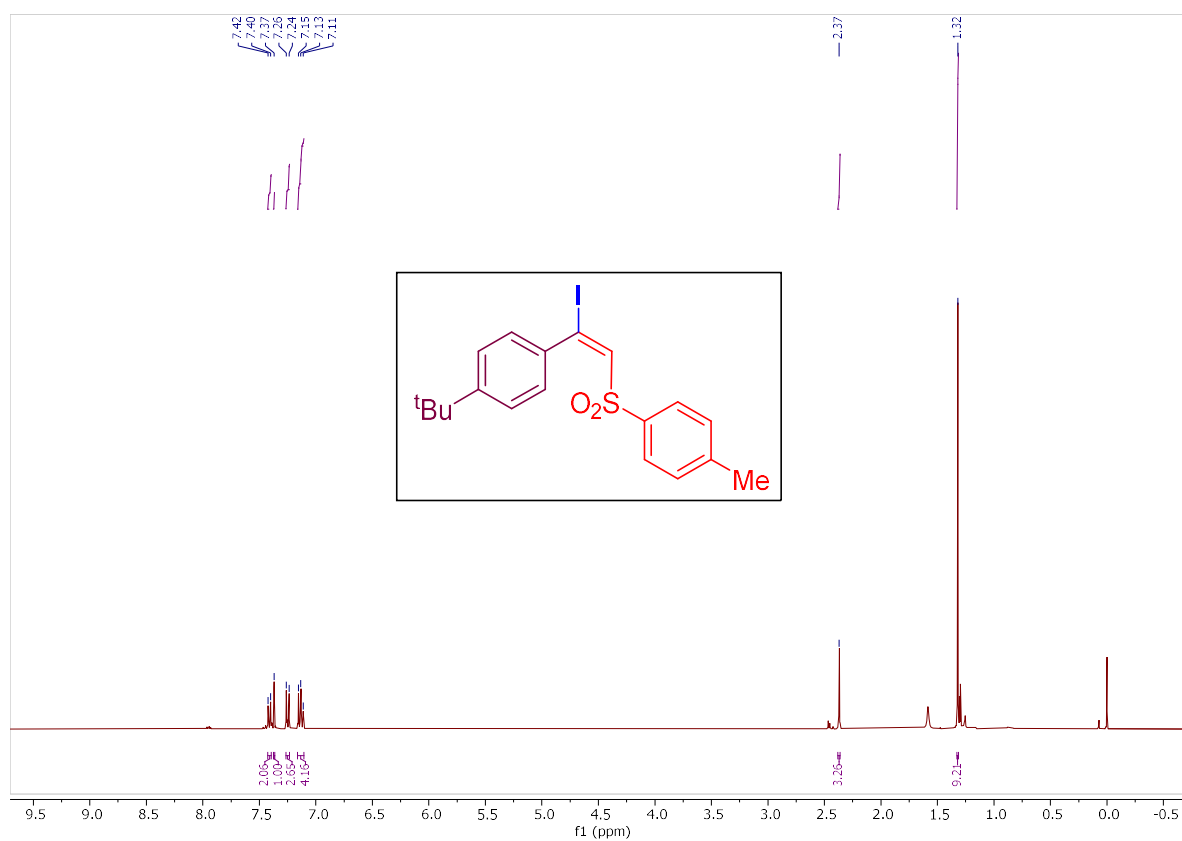<sup>13</sup>C-NMR Spectrum of compound **8** in CDCl<sub>3</sub>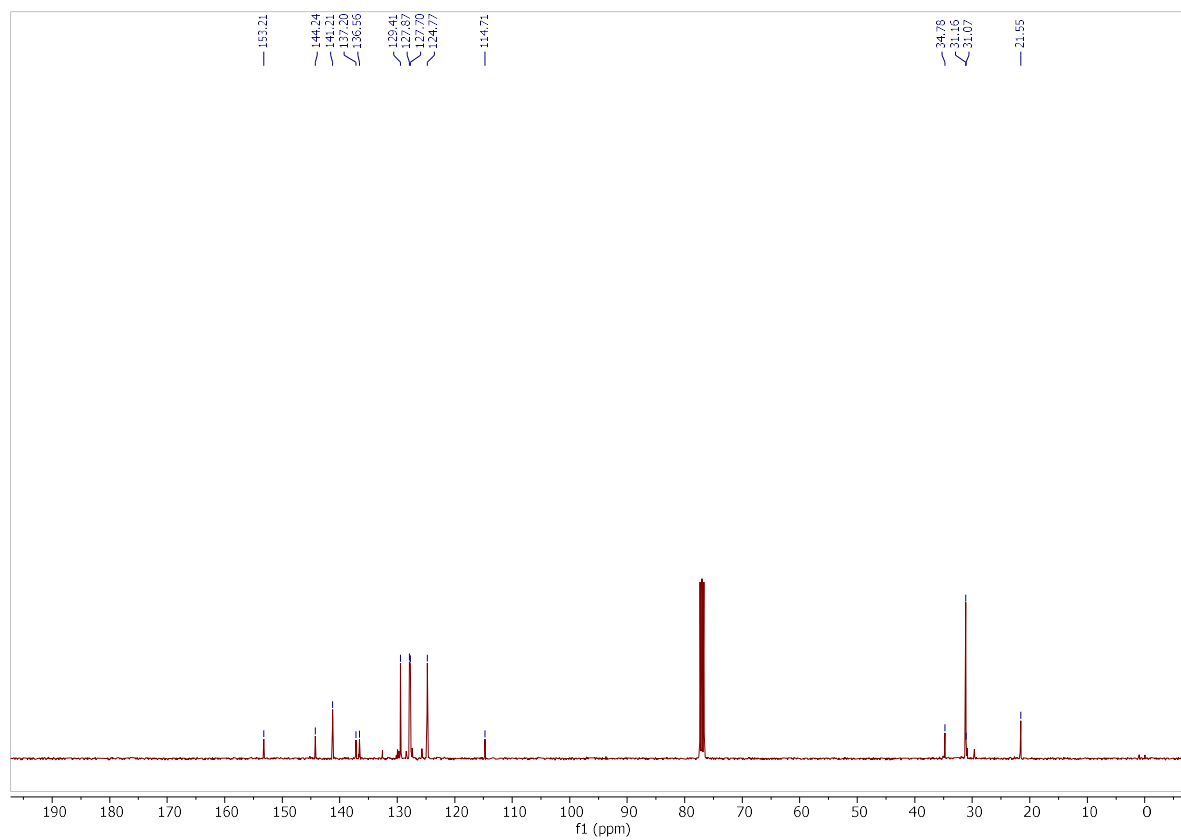

<sup>1</sup>H NMR Spectrum of compound **9** in CDCl<sub>3</sub>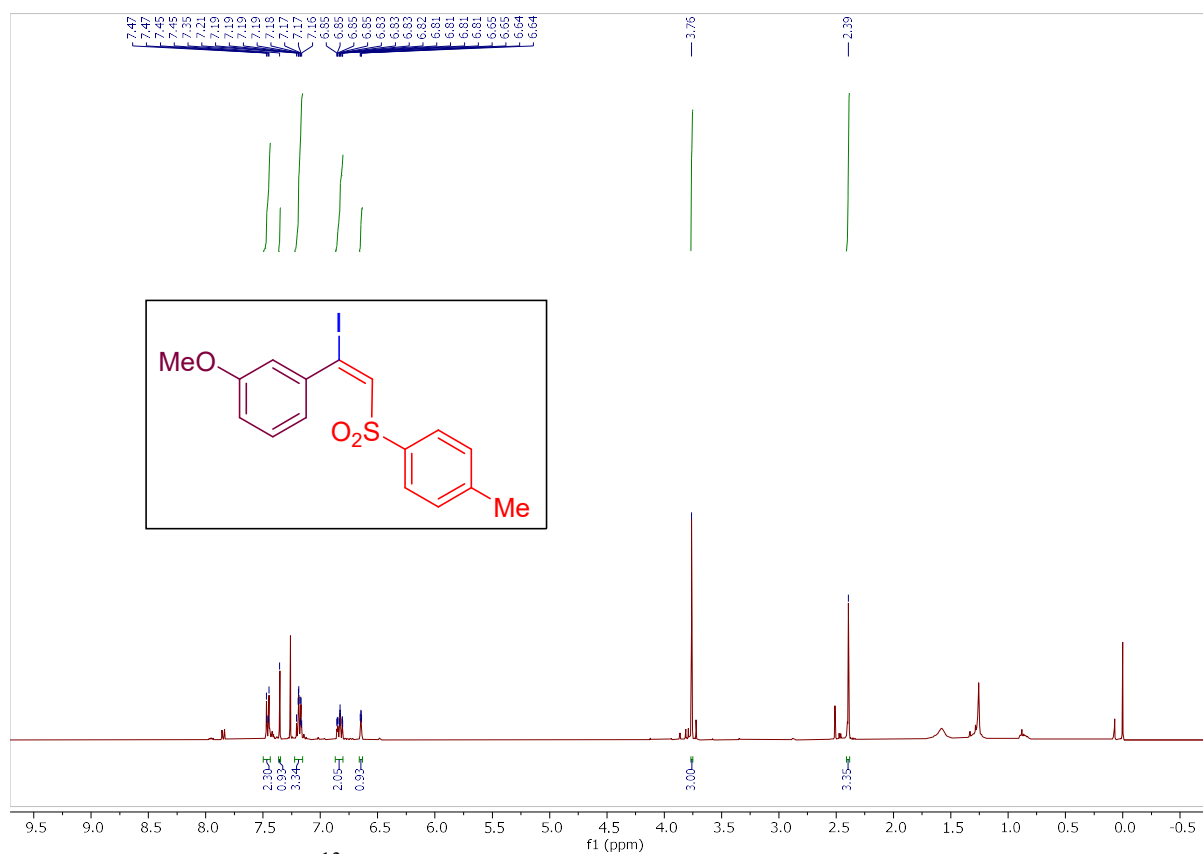<sup>13</sup>C NMR Spectrum of compound **9** in CDCl<sub>3</sub>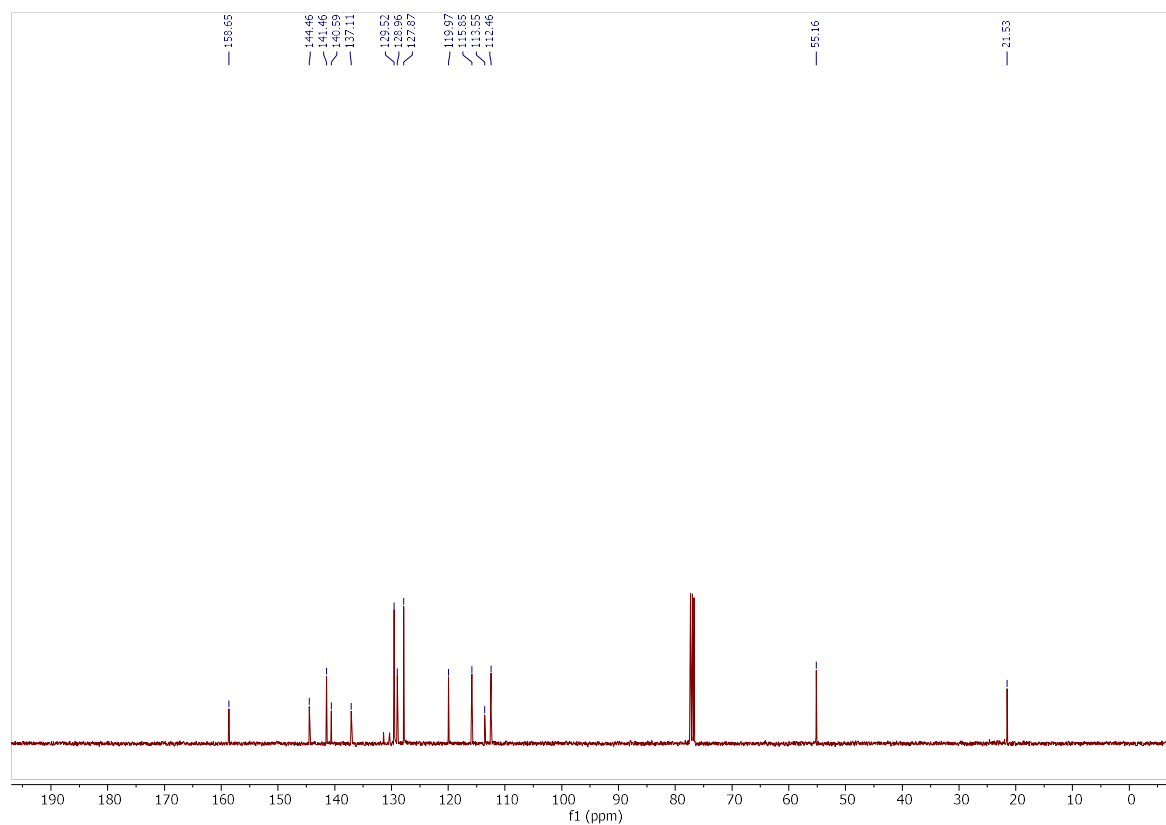

$^1\text{H}$ -NMR Spectrum of compound **10** in  $\text{CDCl}_3$ 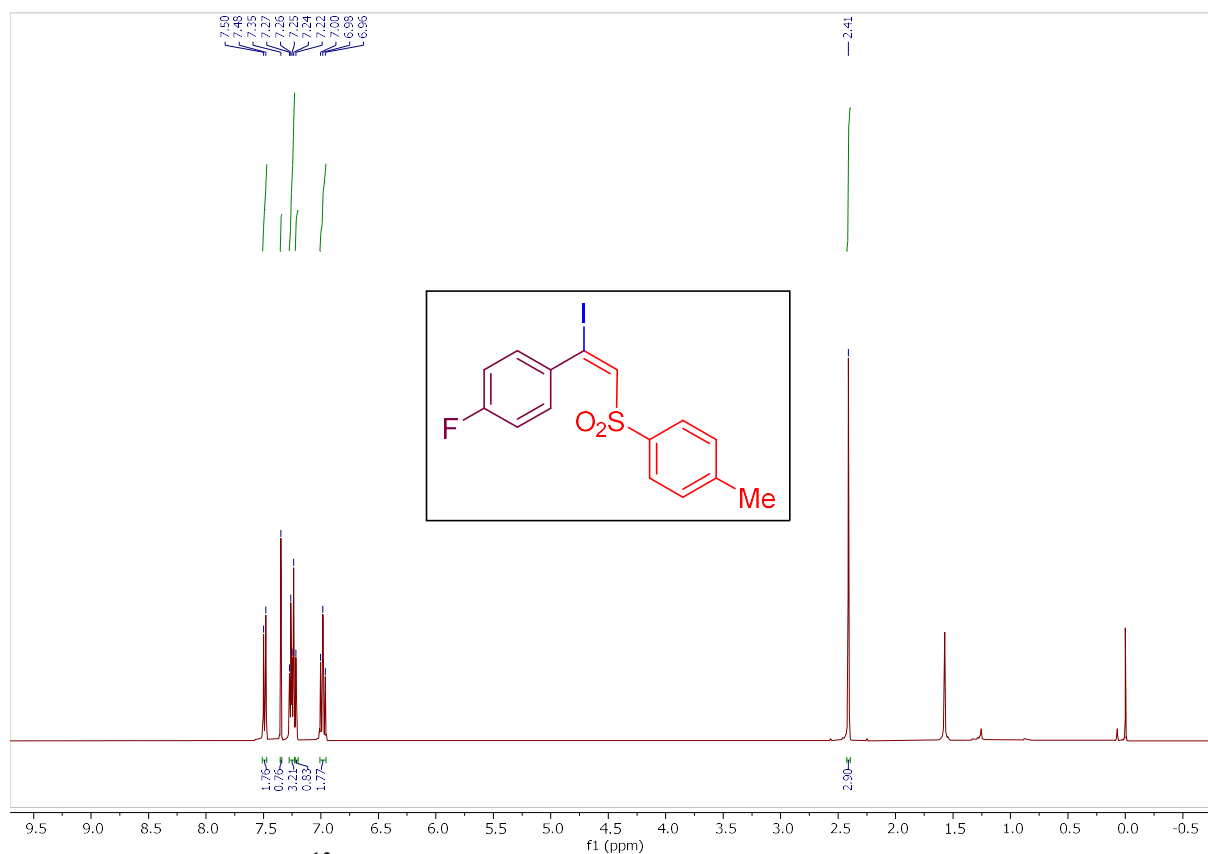 $^{13}\text{C}$ -NMR Spectrum of compound **10** in  $\text{CDCl}_3$ 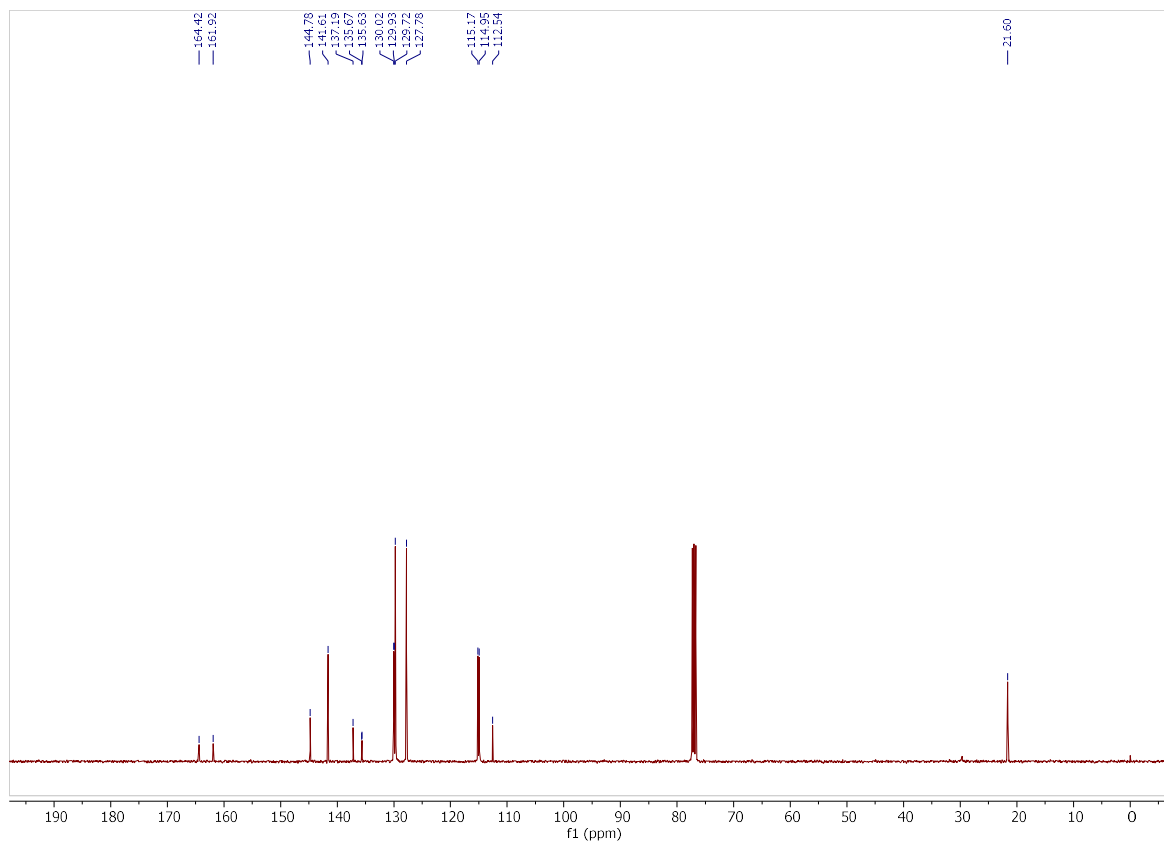



$^1\text{H}$ -NMR Spectrum of compound **11** in  $\text{CDCl}_3$ 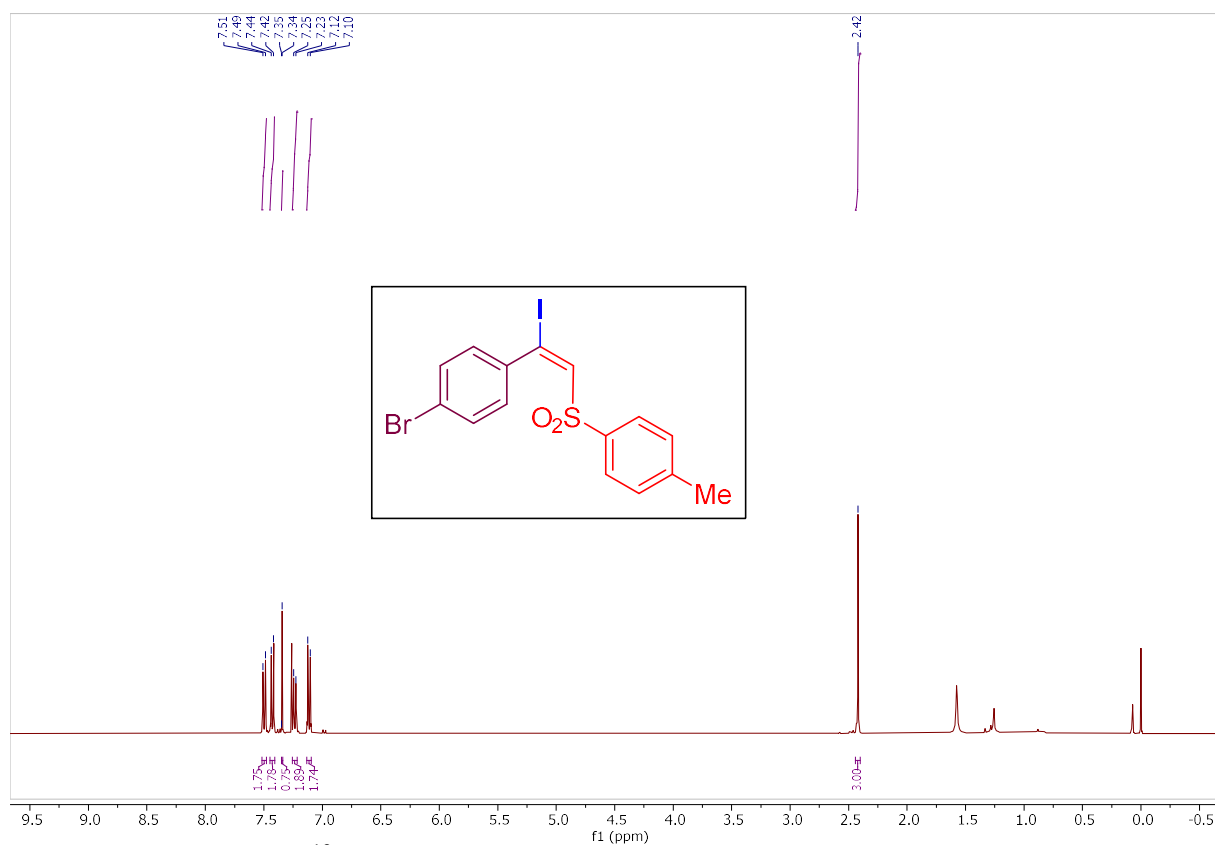 $^{13}\text{C}$ -NMR Spectrum of compound **11** in  $\text{CDCl}_3$ 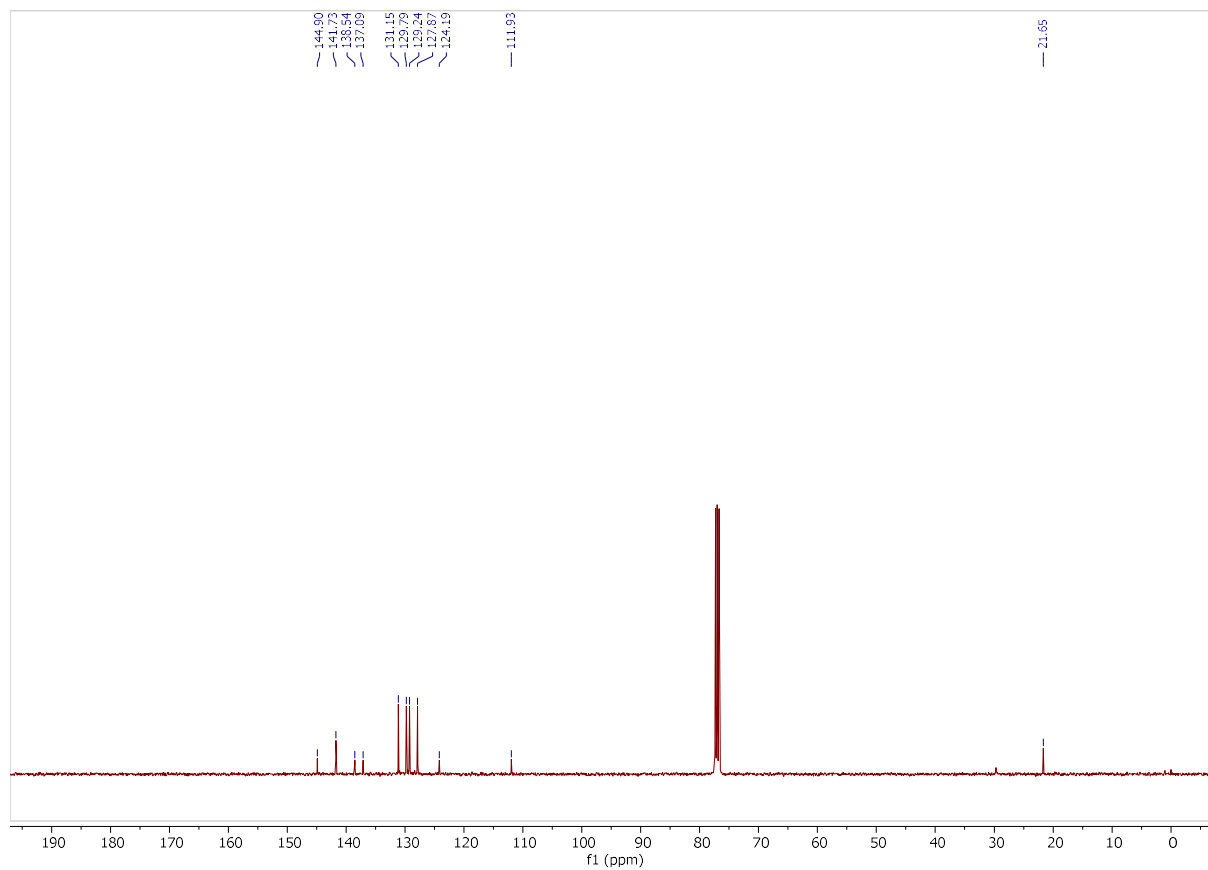

<sup>1</sup>H-NMR Spectrum of compound **12** in CDCl<sub>3</sub>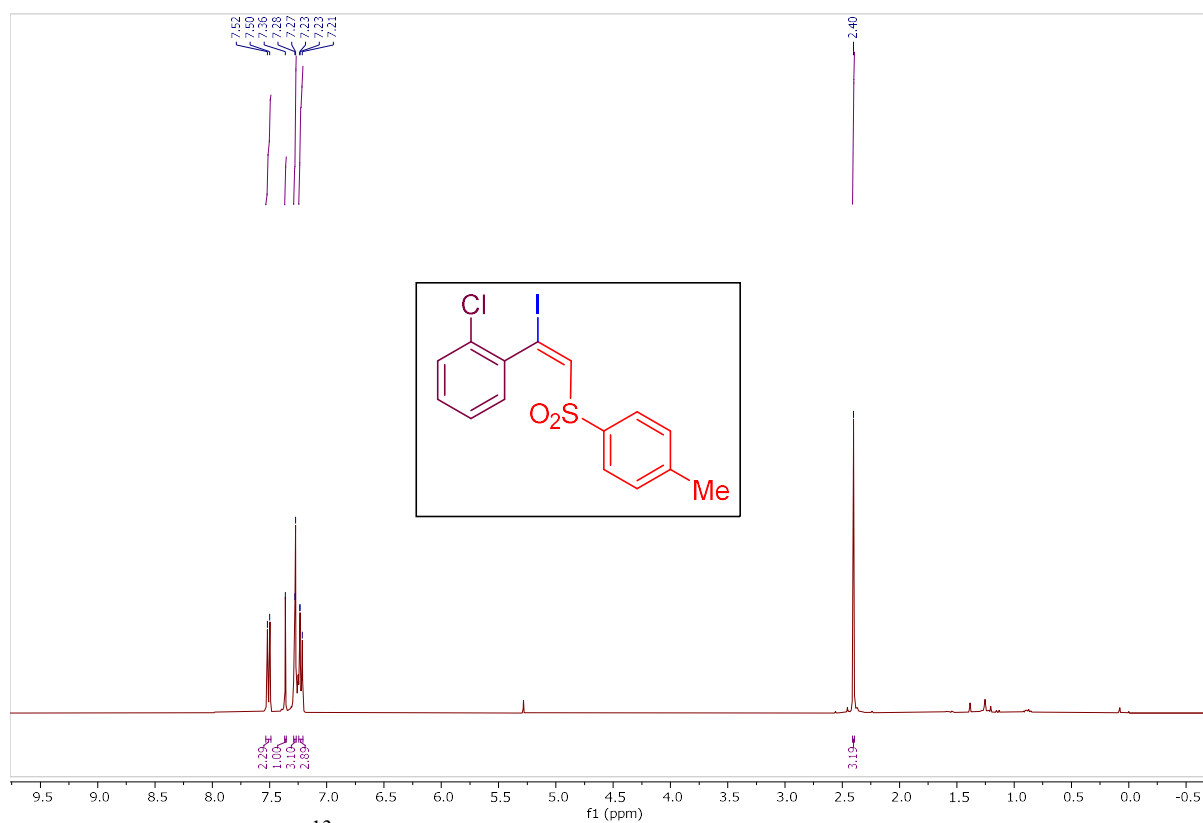<sup>13</sup>C-NMR Spectrum of compound **12** in CDCl<sub>3</sub>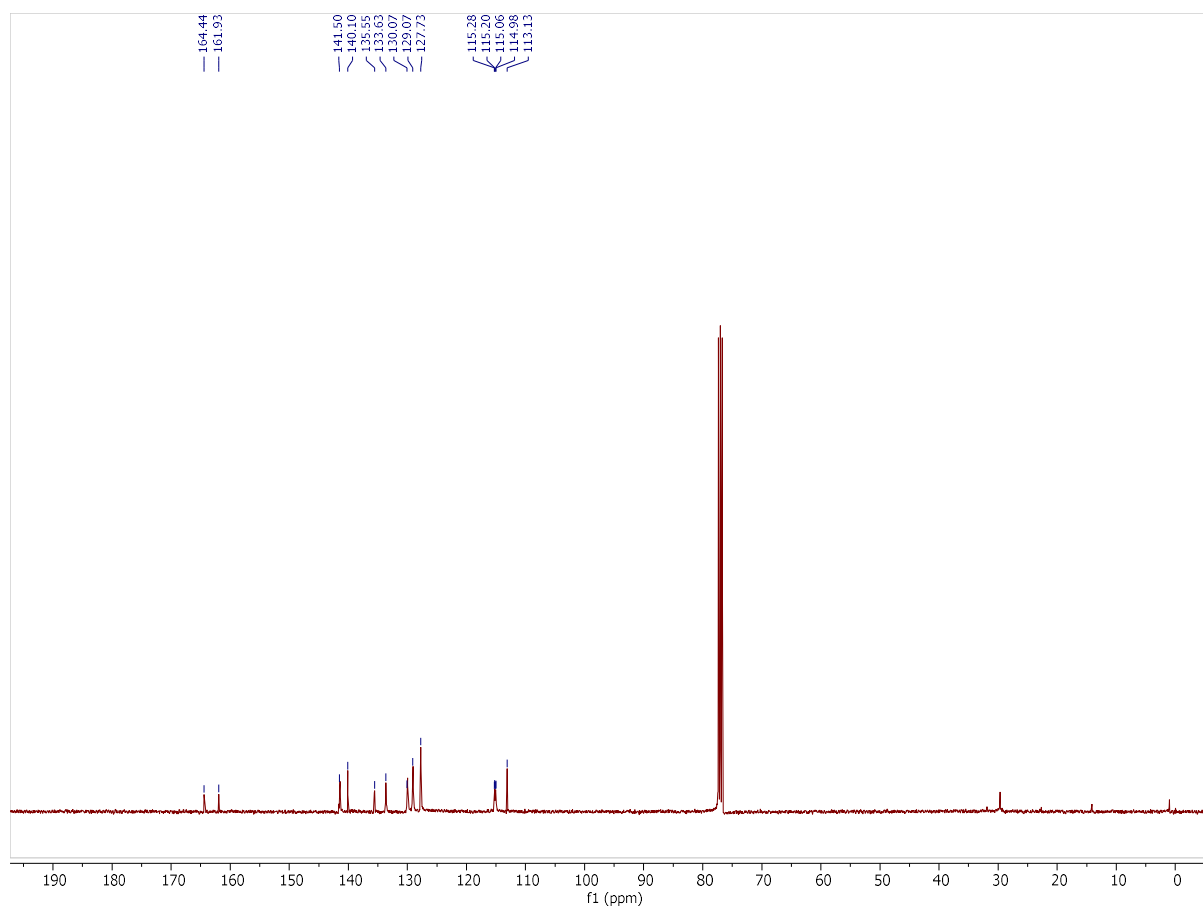

$^1\text{H}$  NMR Spectrum of compound **13** in  $\text{CDCl}_3$ 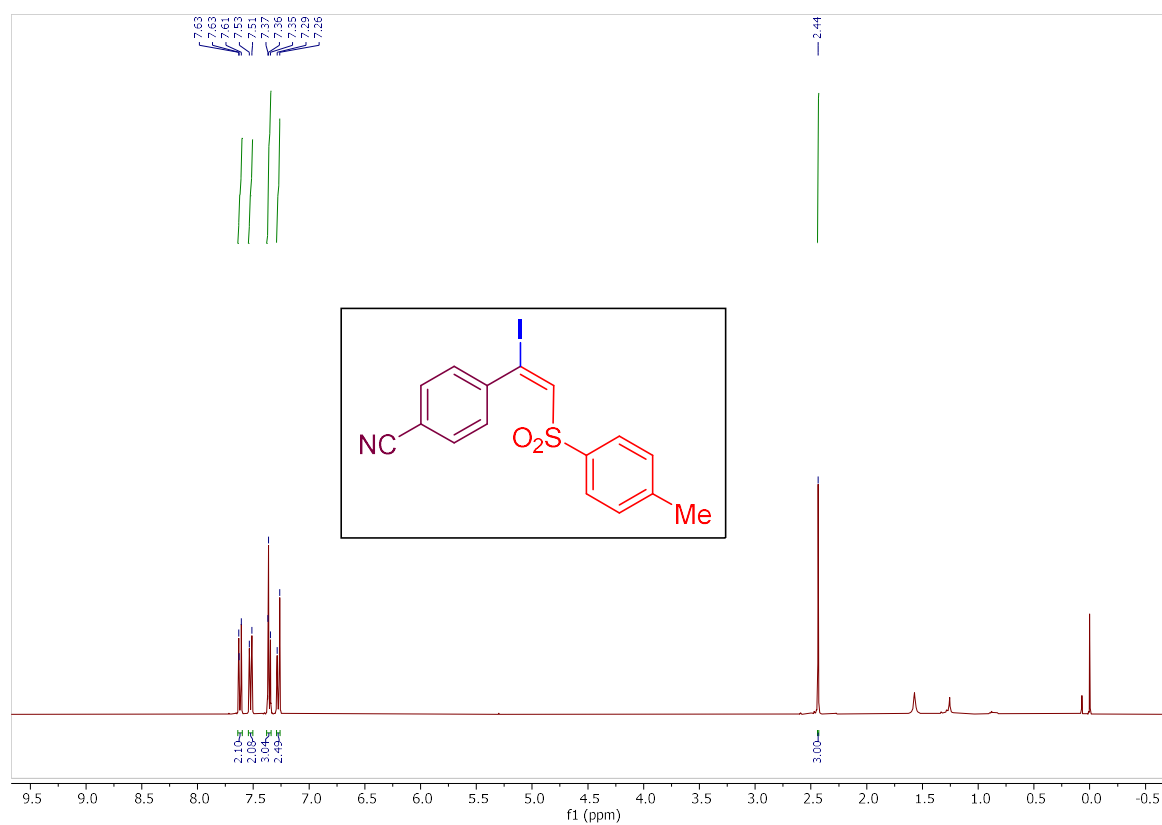 $^{13}\text{C}$  NMR Spectrum of compound **13** in  $\text{CDCl}_3$ 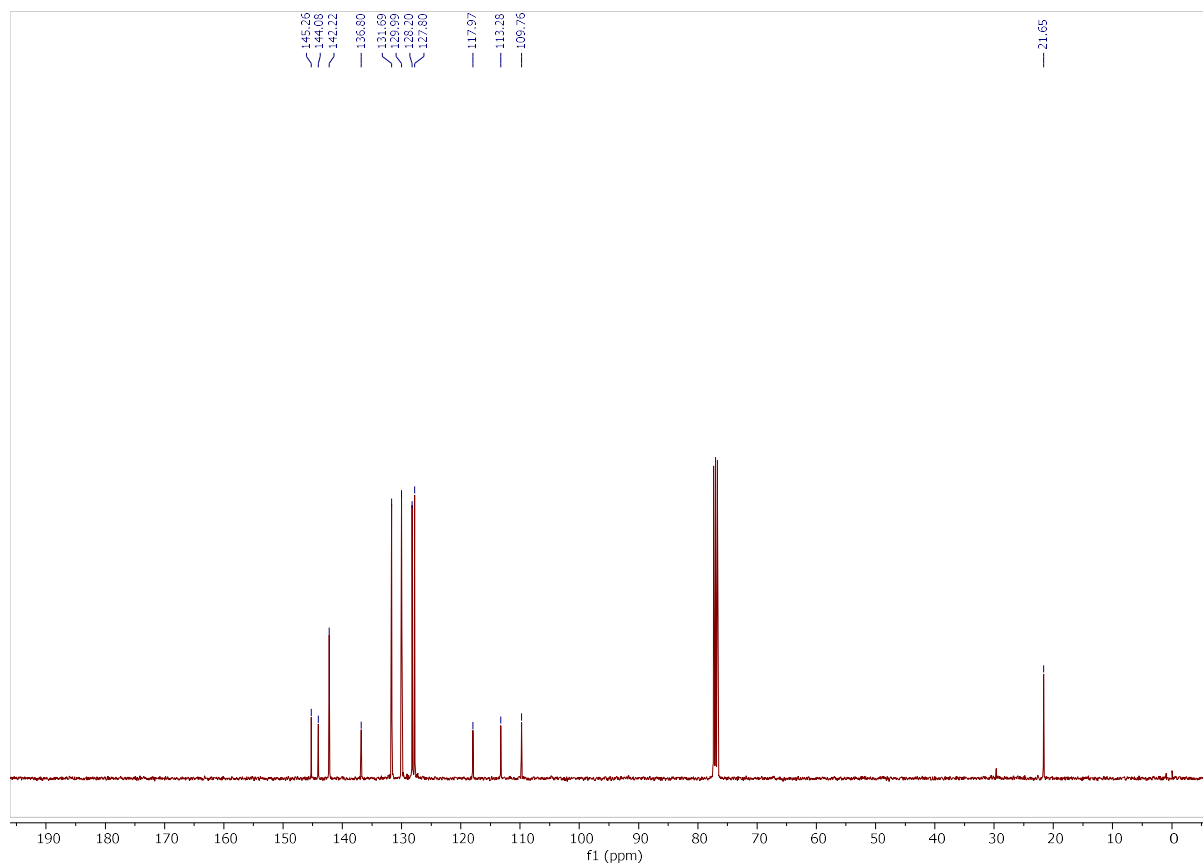

$^1\text{H}$ -NMR Spectrum of compound **14** in  $\text{CDCl}_3$ 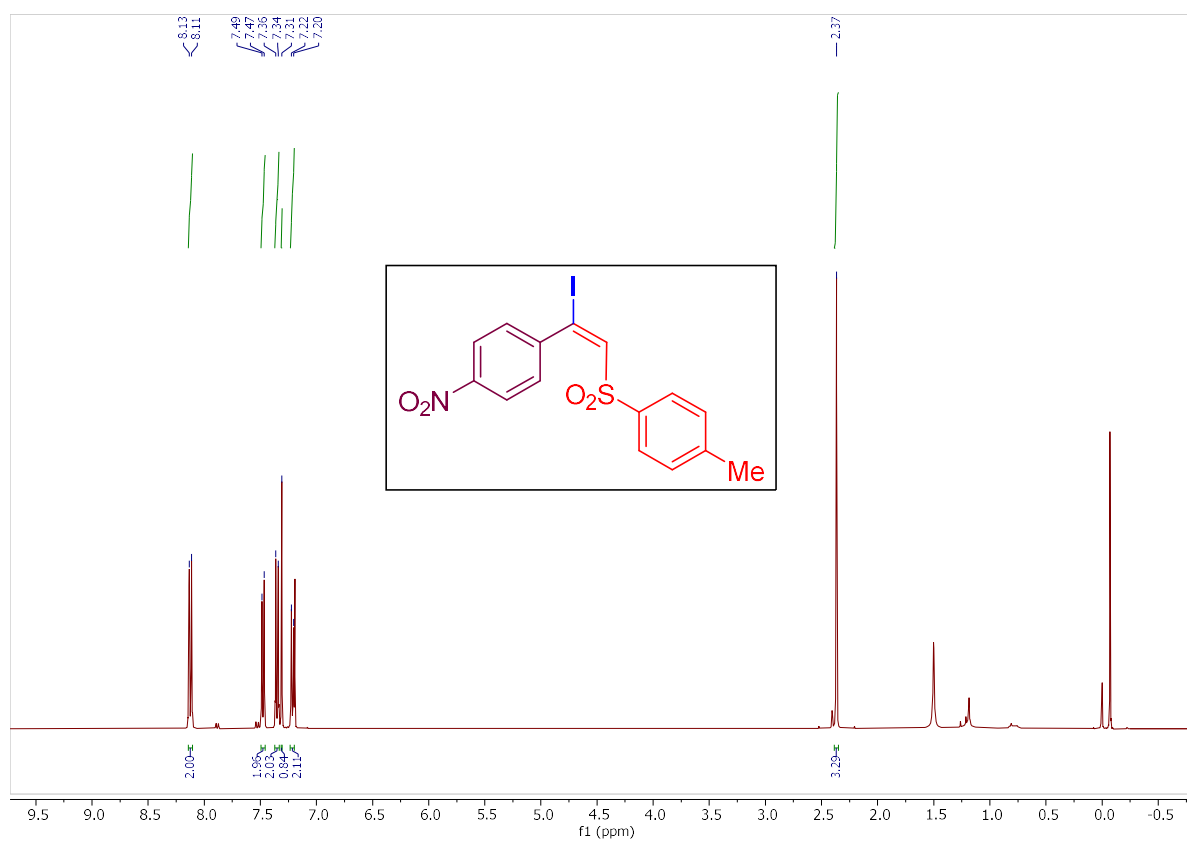 $^{13}\text{C}$ -NMR Spectrum of compound **14** in  $\text{CDCl}_3$ 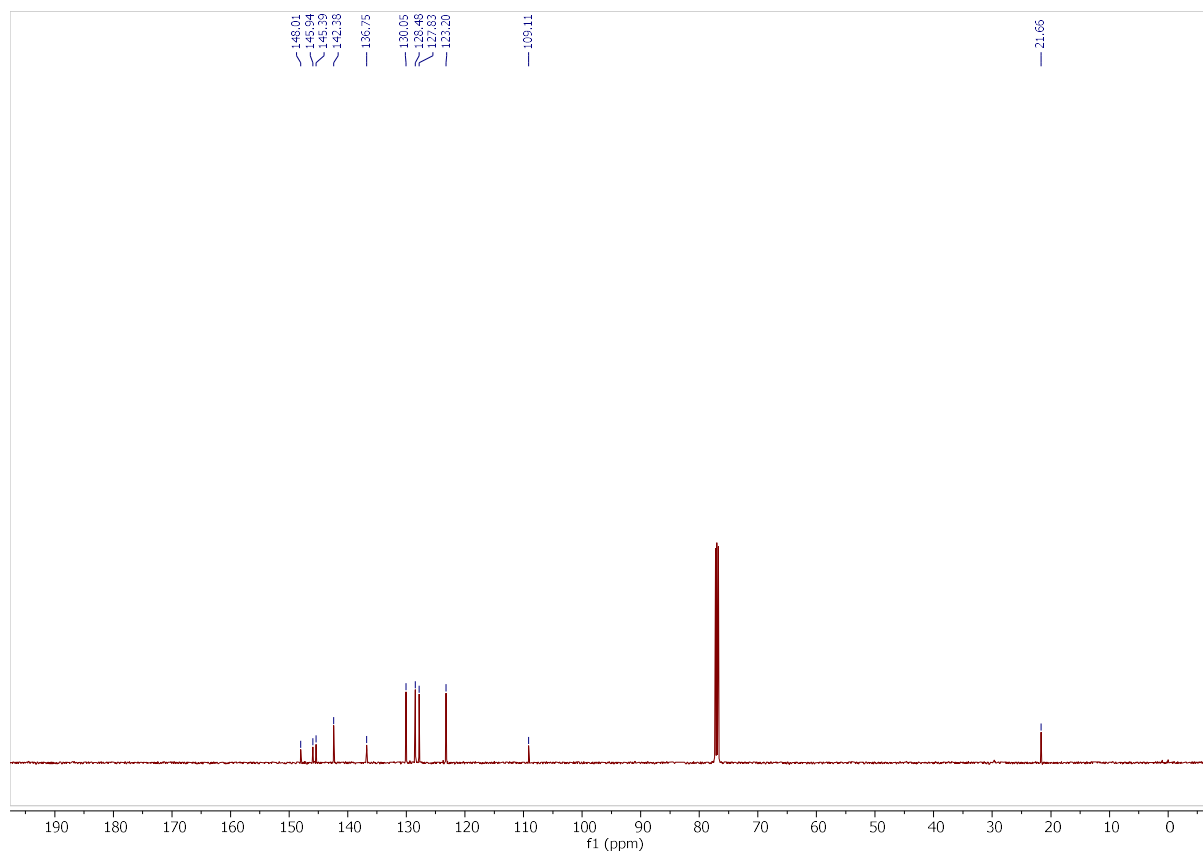

$^1\text{H}$ -NMR Spectrum of compound **15** in  $\text{CDCl}_3$ 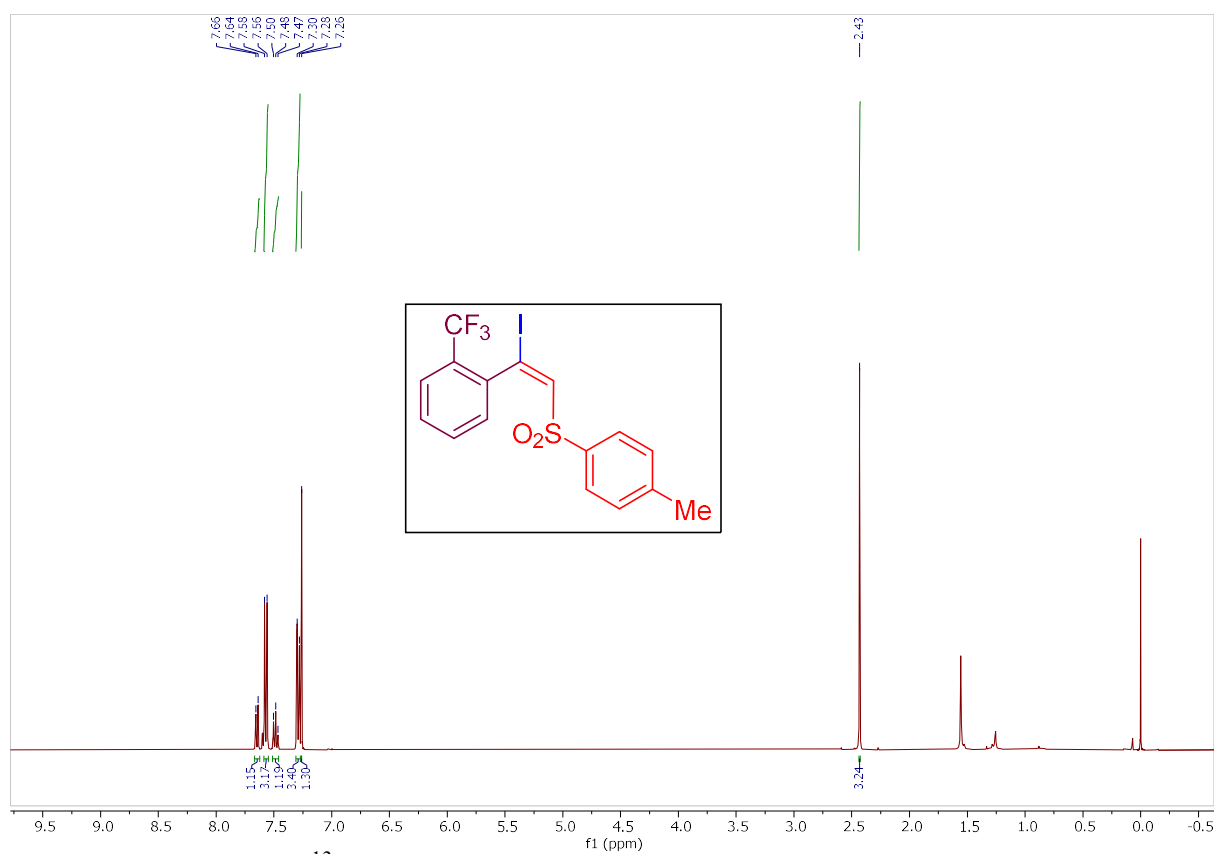 $^{13}\text{C}$ -NMR Spectrum of compound **15** in  $\text{CDCl}_3$ 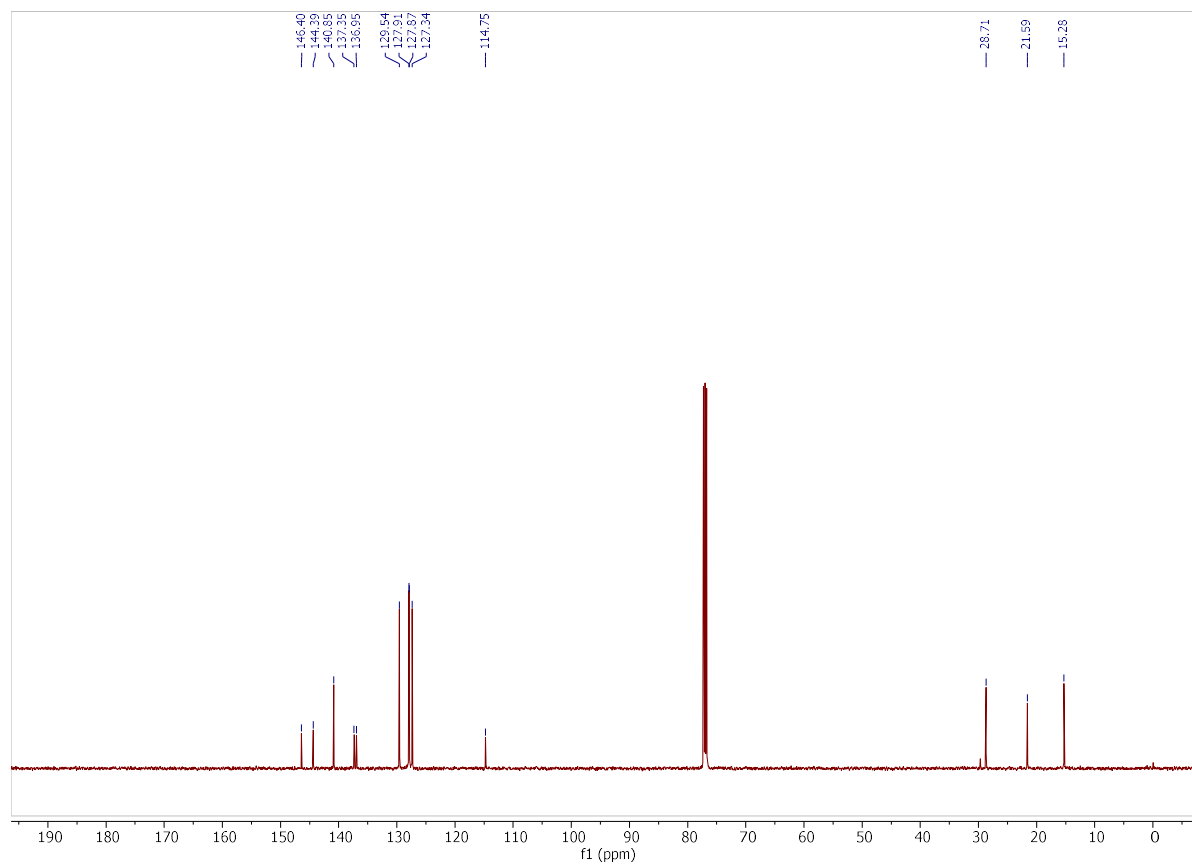

$^1\text{H}$ -NMR Spectrum of compound **16** in  $\text{CDCl}_3$ 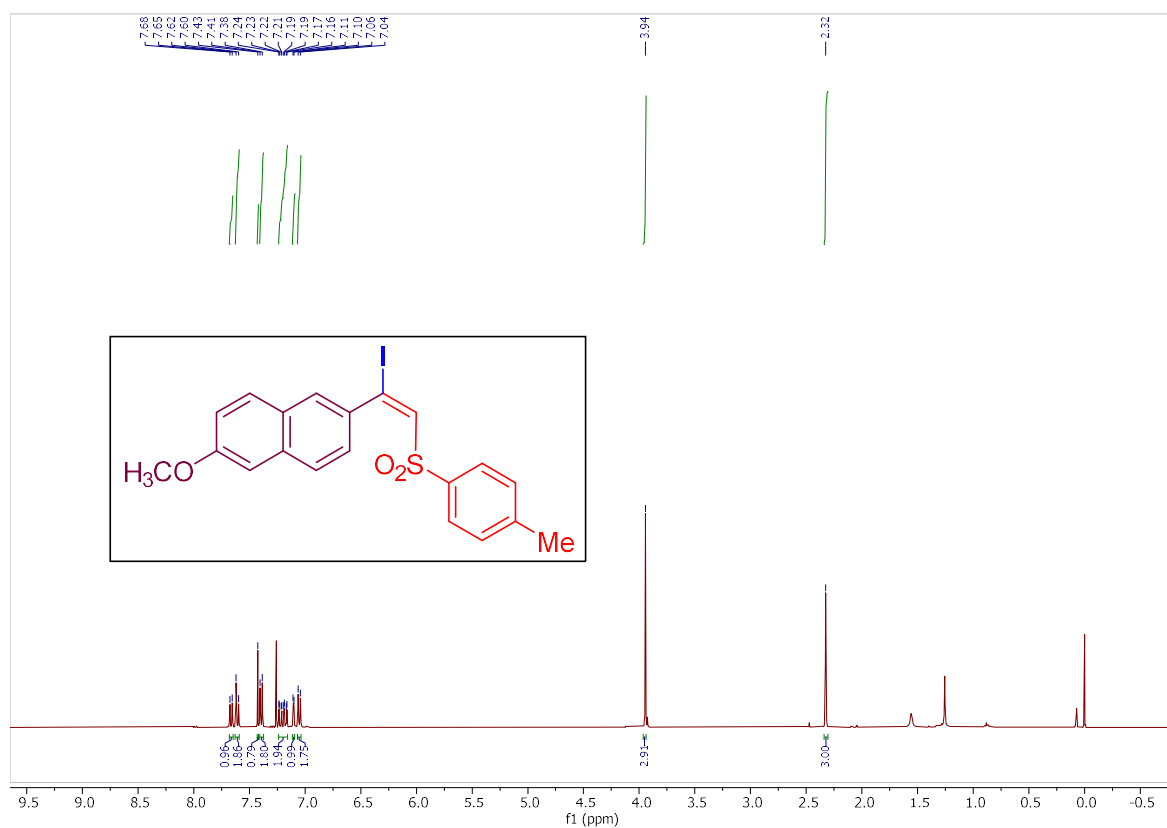 $^{13}\text{C}$ -NMR Spectrum of compound **16** in  $\text{CDCl}_3$ 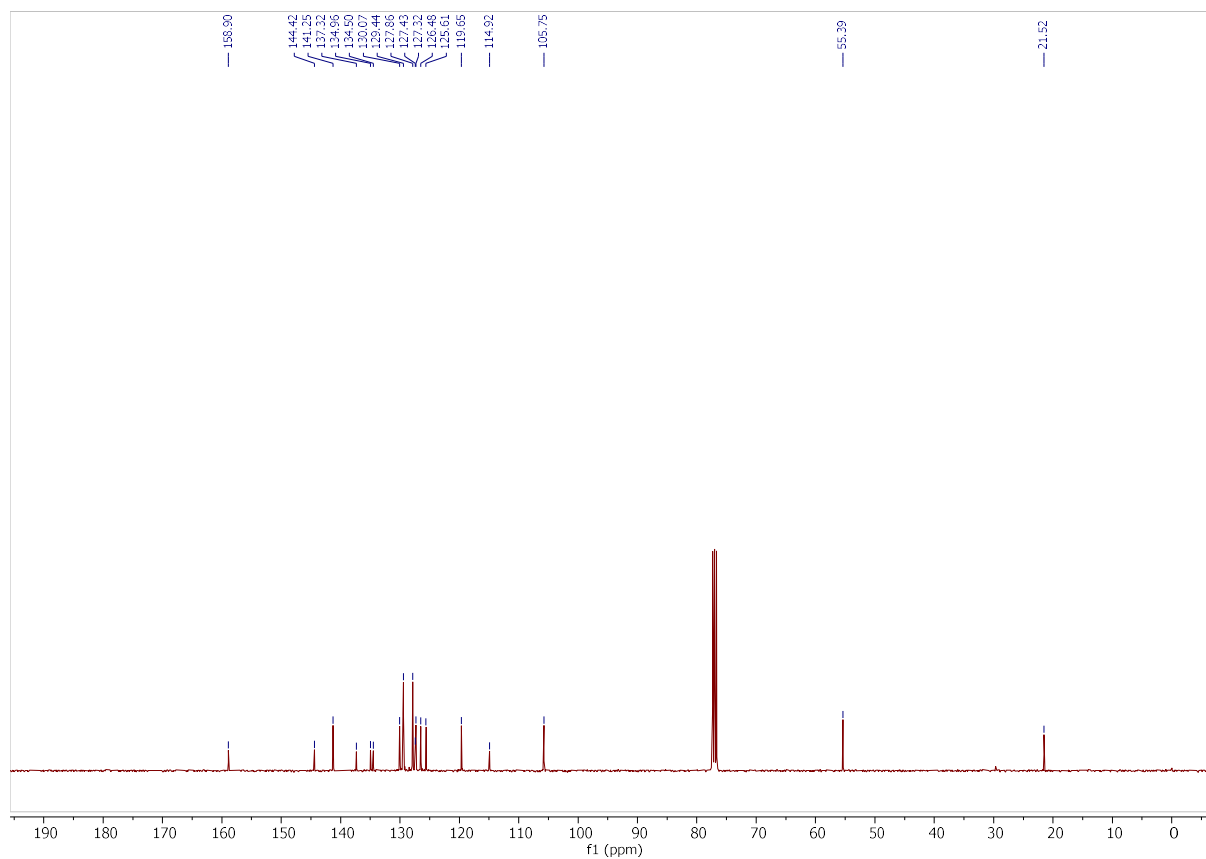

<sup>1</sup>H-NMR Spectrum of compound **17** in CDCl<sub>3</sub>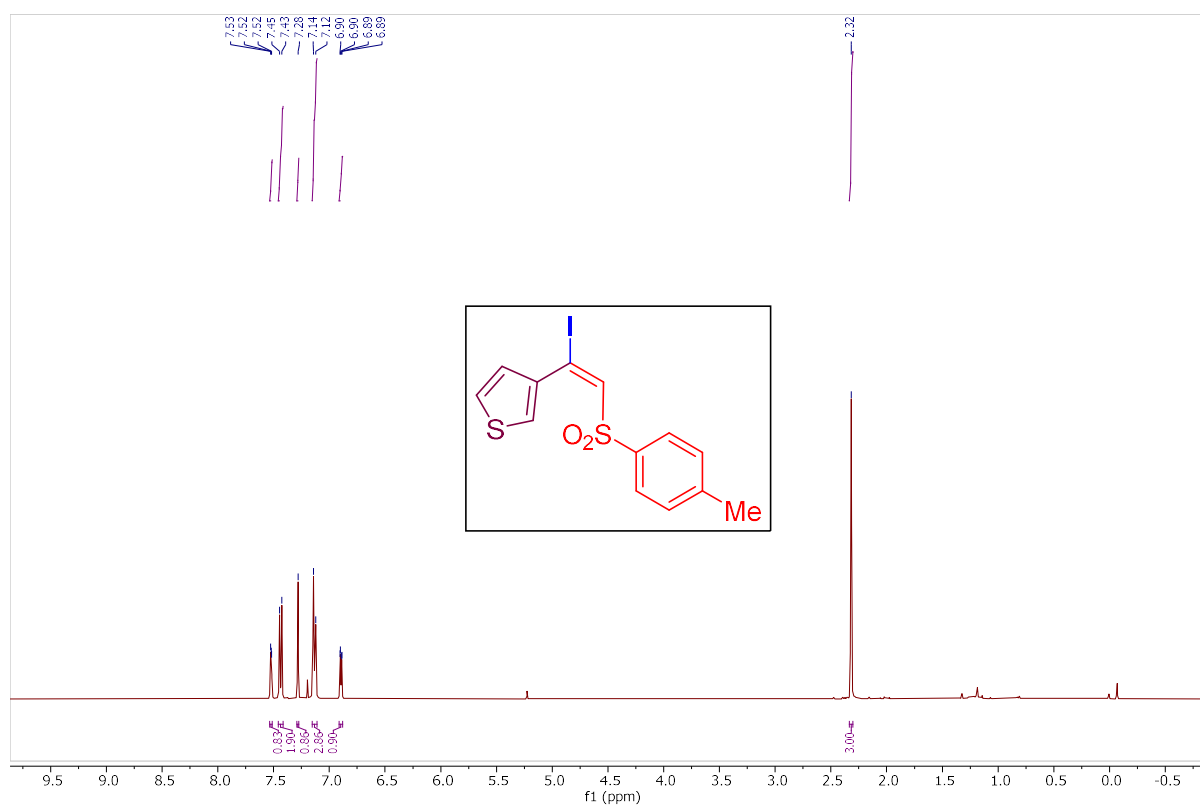<sup>13</sup>C-NMR Spectrum of compound **17** in CDCl<sub>3</sub>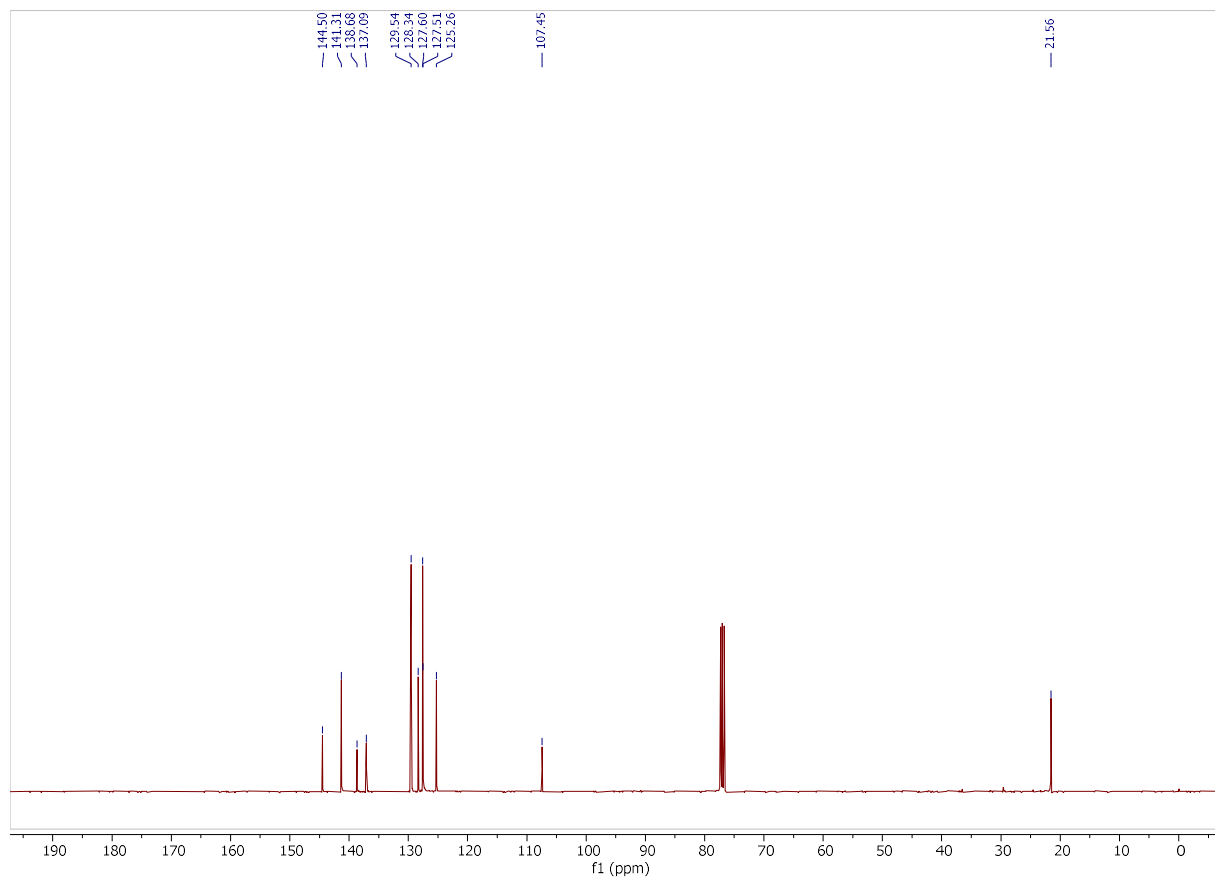

<sup>1</sup>H-NMR Spectrum of compound **18** in CDCl<sub>3</sub>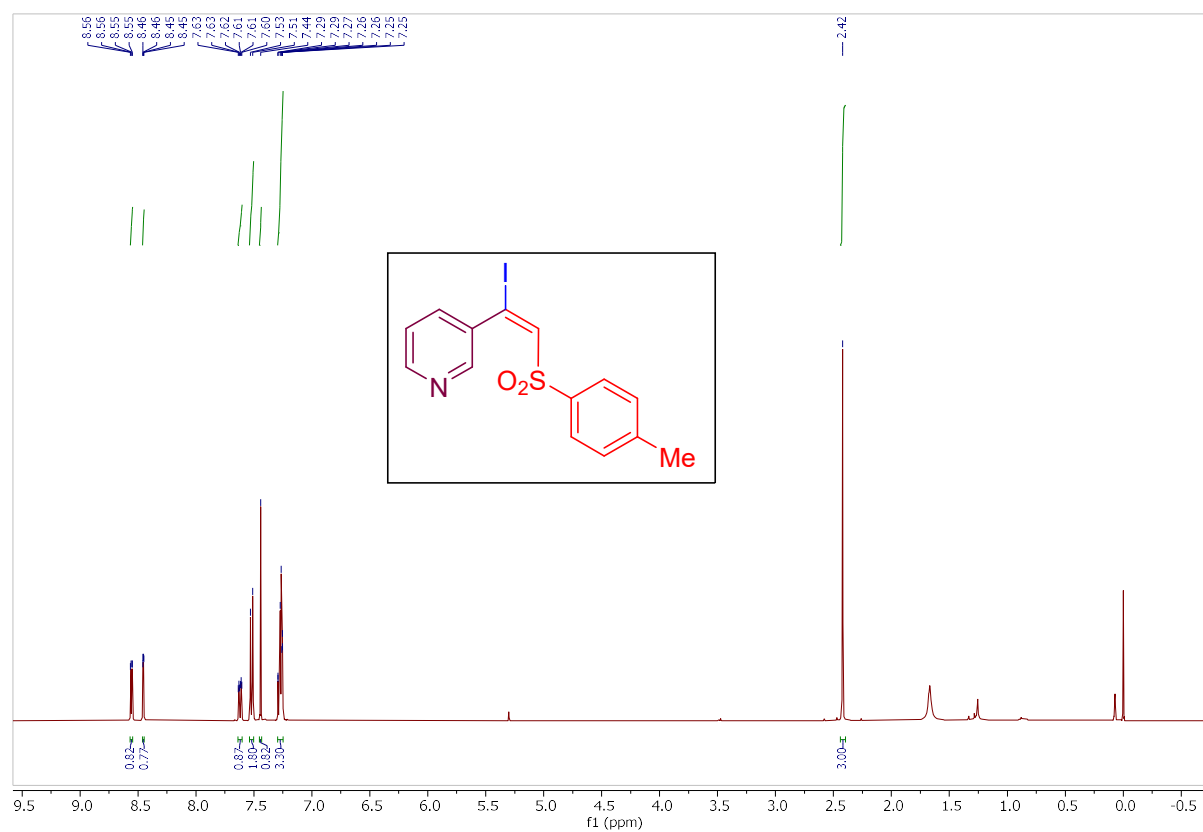<sup>13</sup>C-NMR Spectrum of compound **18** in CDCl<sub>3</sub>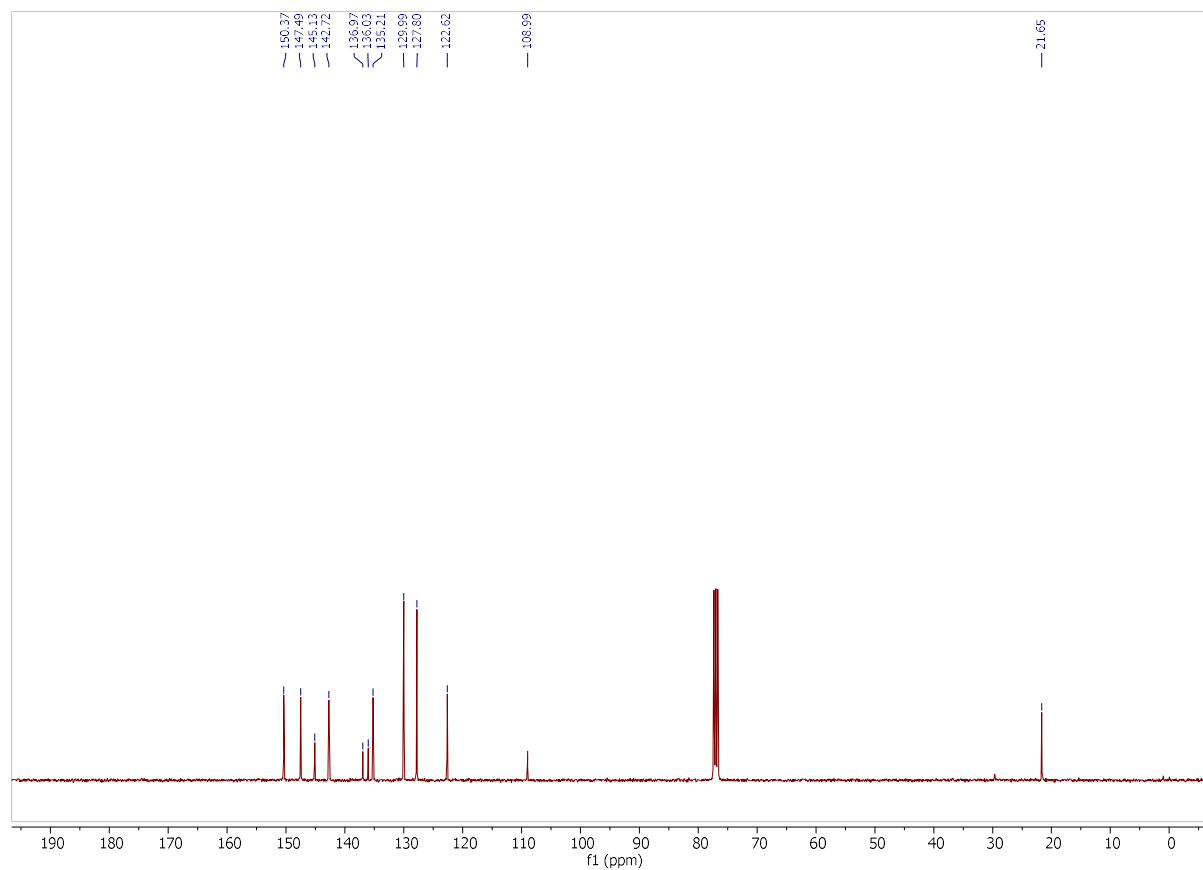



$^1\text{H}$ -NMR Spectrum of compound **19** in  $\text{CDCl}_3$ 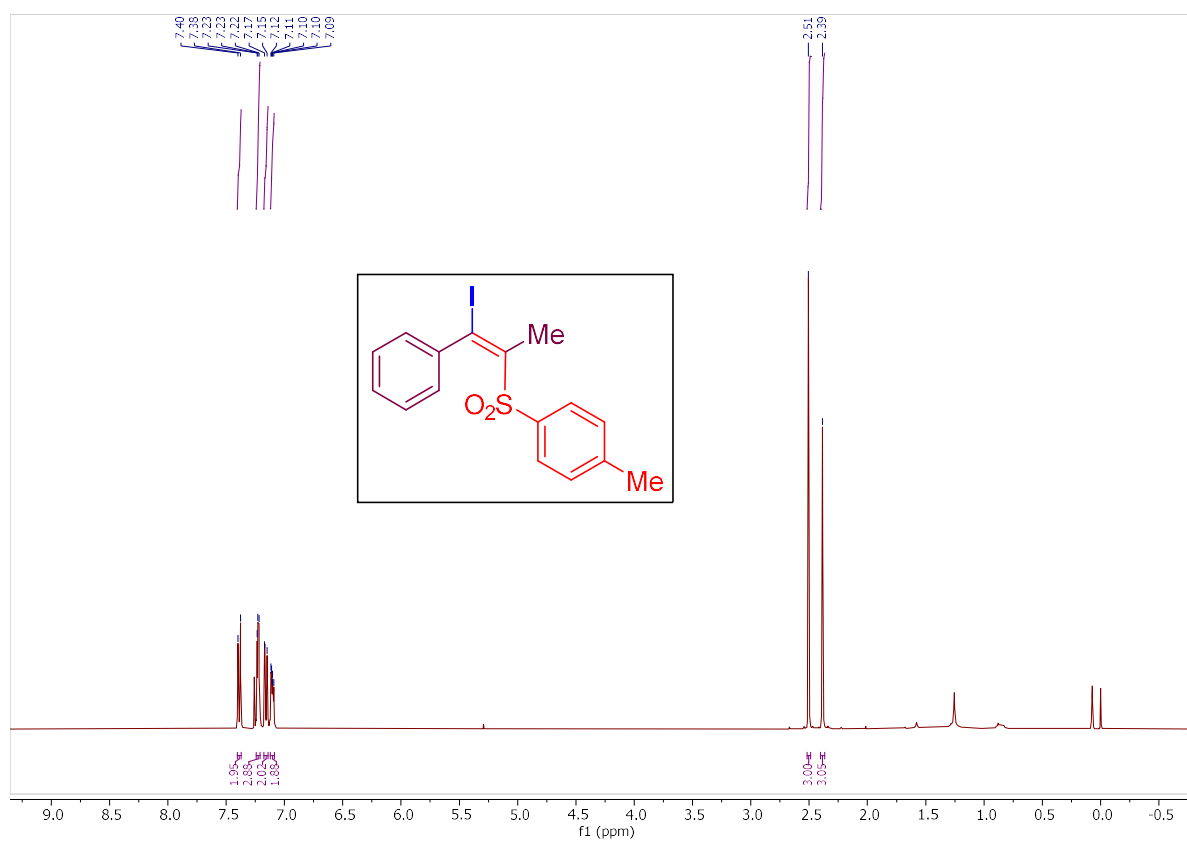 $^{13}\text{C}$ -NMR Spectrum of compound **19** in  $\text{CDCl}_3$ 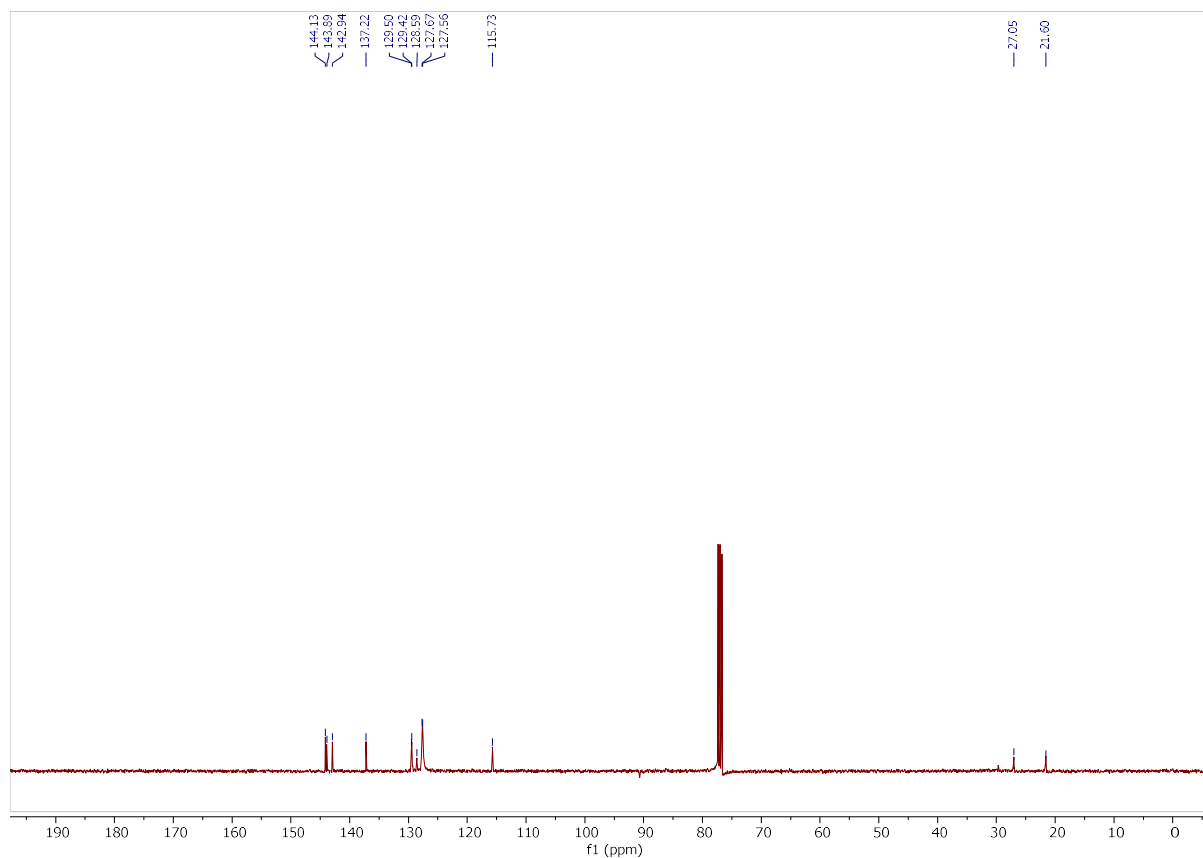

<sup>1</sup>H-NMR Spectrum of compound **20** in CDCl<sub>3</sub>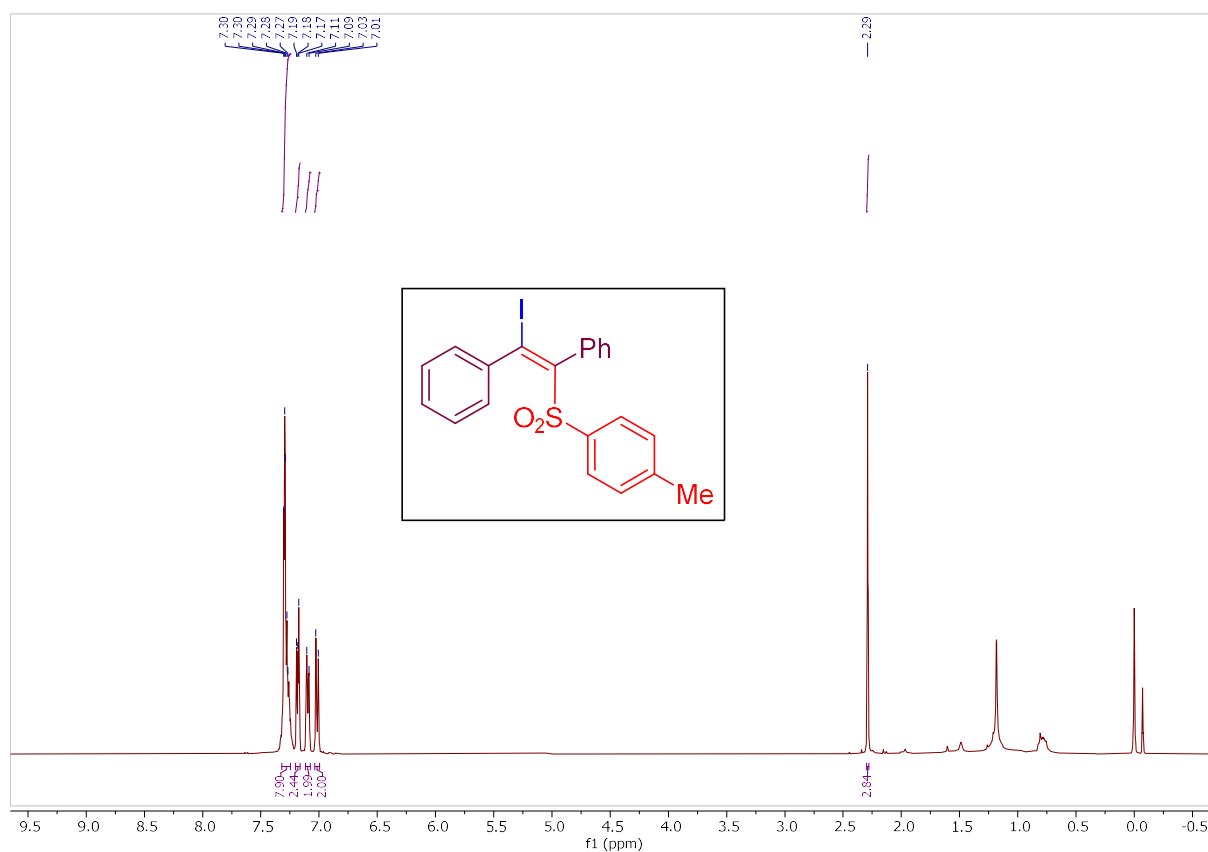<sup>13</sup>C-NMR Spectrum of compound **20** in CDCl<sub>3</sub>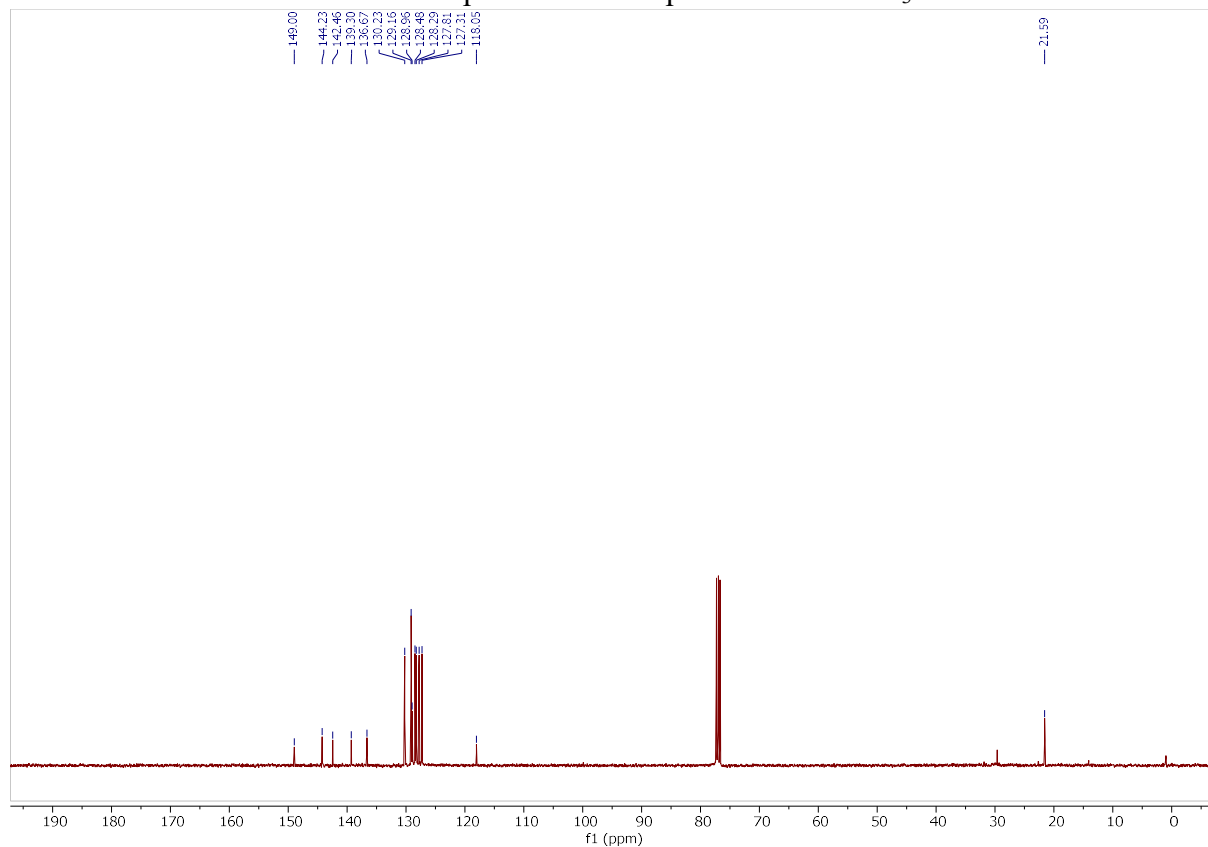

<sup>1</sup>H-NMR Spectrum of compound **21** in CDCl<sub>3</sub>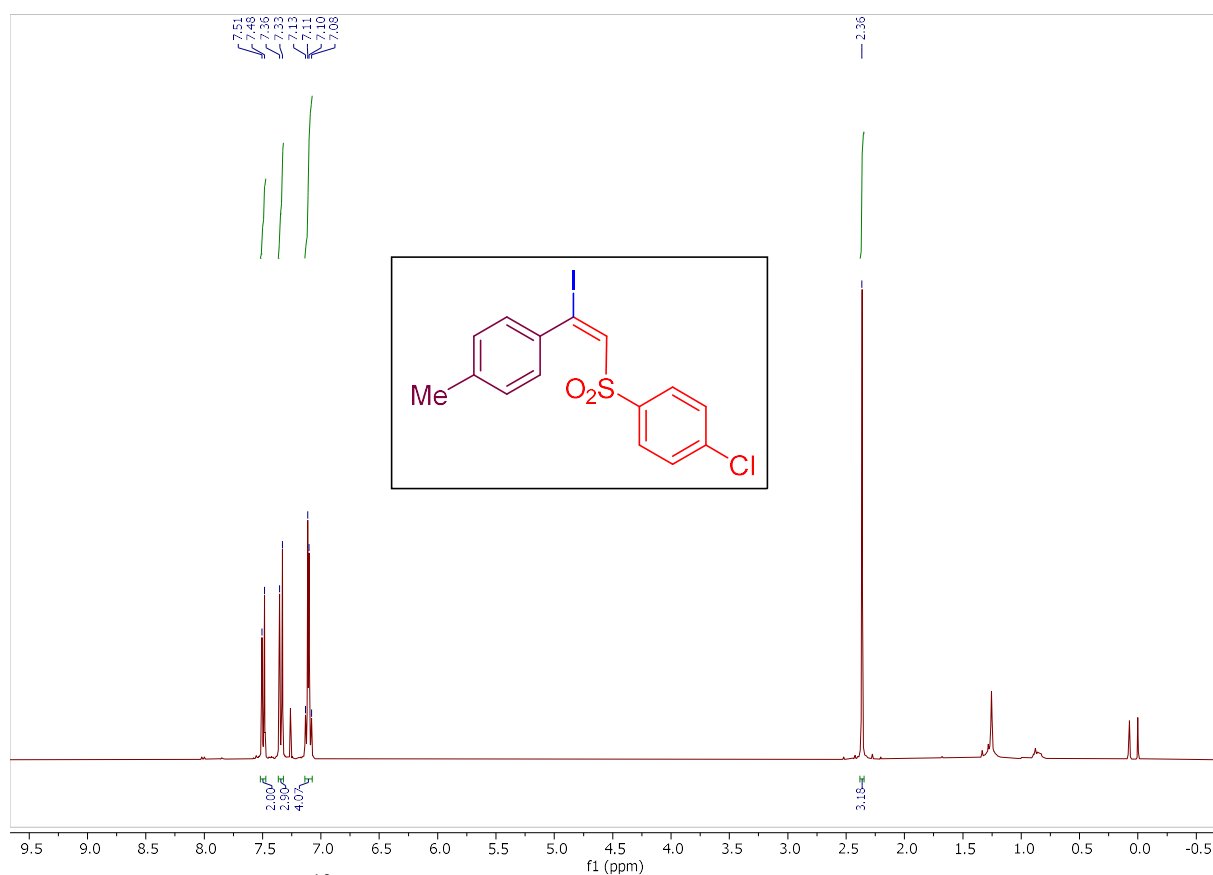<sup>13</sup>C-NMR Spectrum of compound **21** in CDCl<sub>3</sub>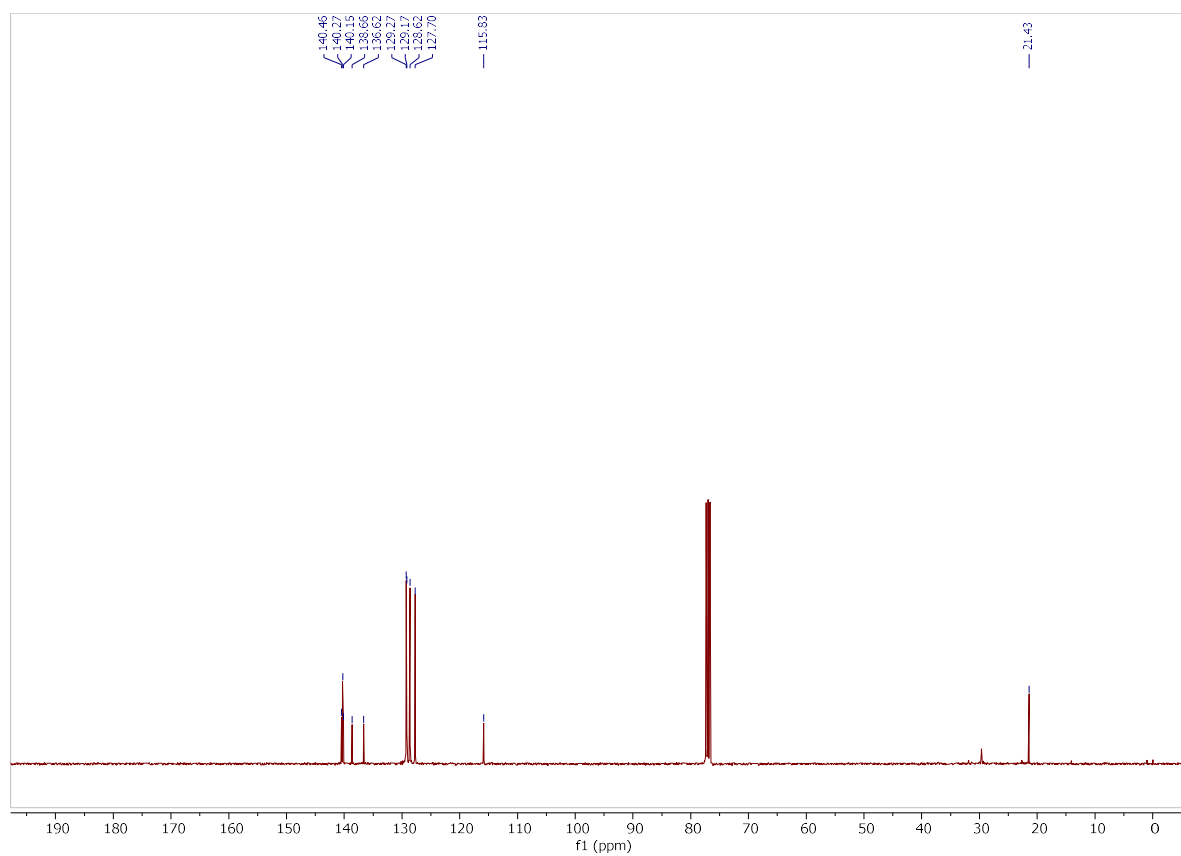

<sup>1</sup>H-NMR Spectrum of compound **22** in CDCl<sub>3</sub>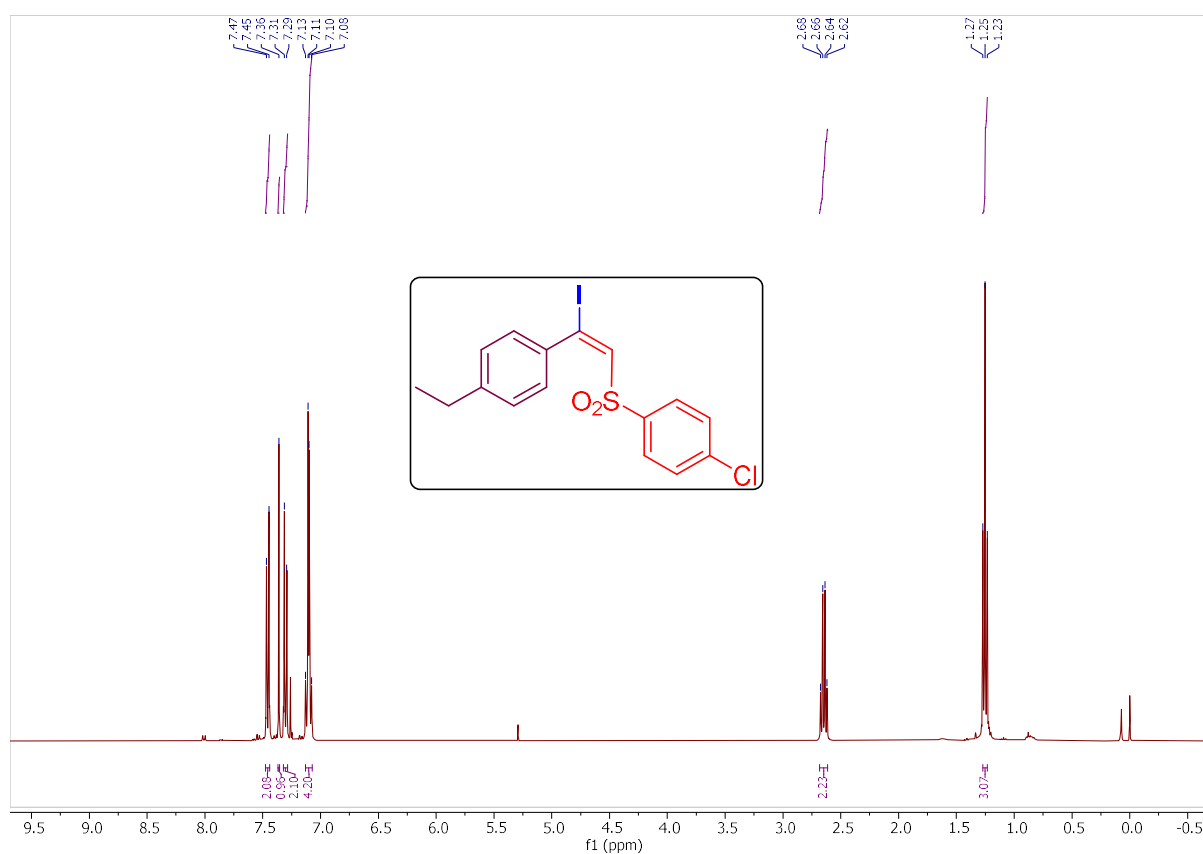<sup>13</sup>C-NMR Spectrum of compound **22** in CDCl<sub>3</sub>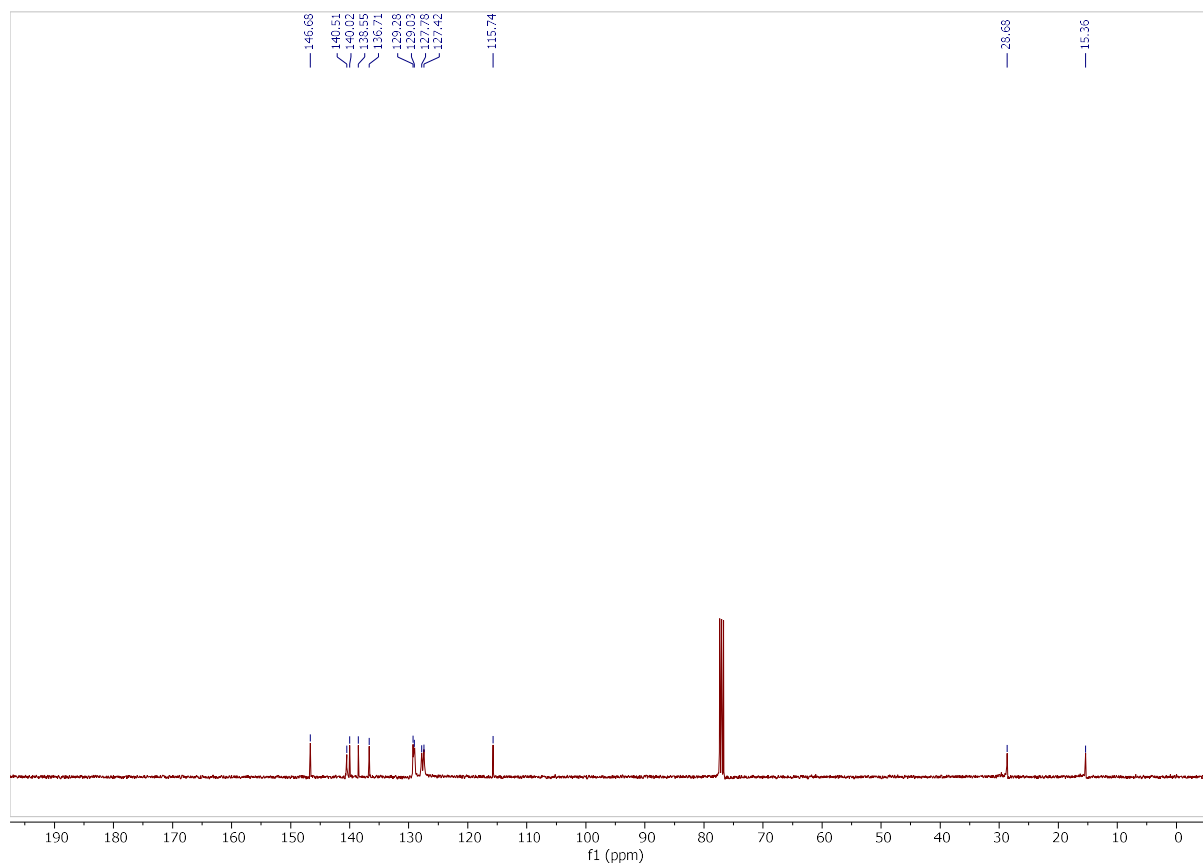

$^1\text{H}$  NMR Spectrum of compound **23** in  $\text{CDCl}_3$ 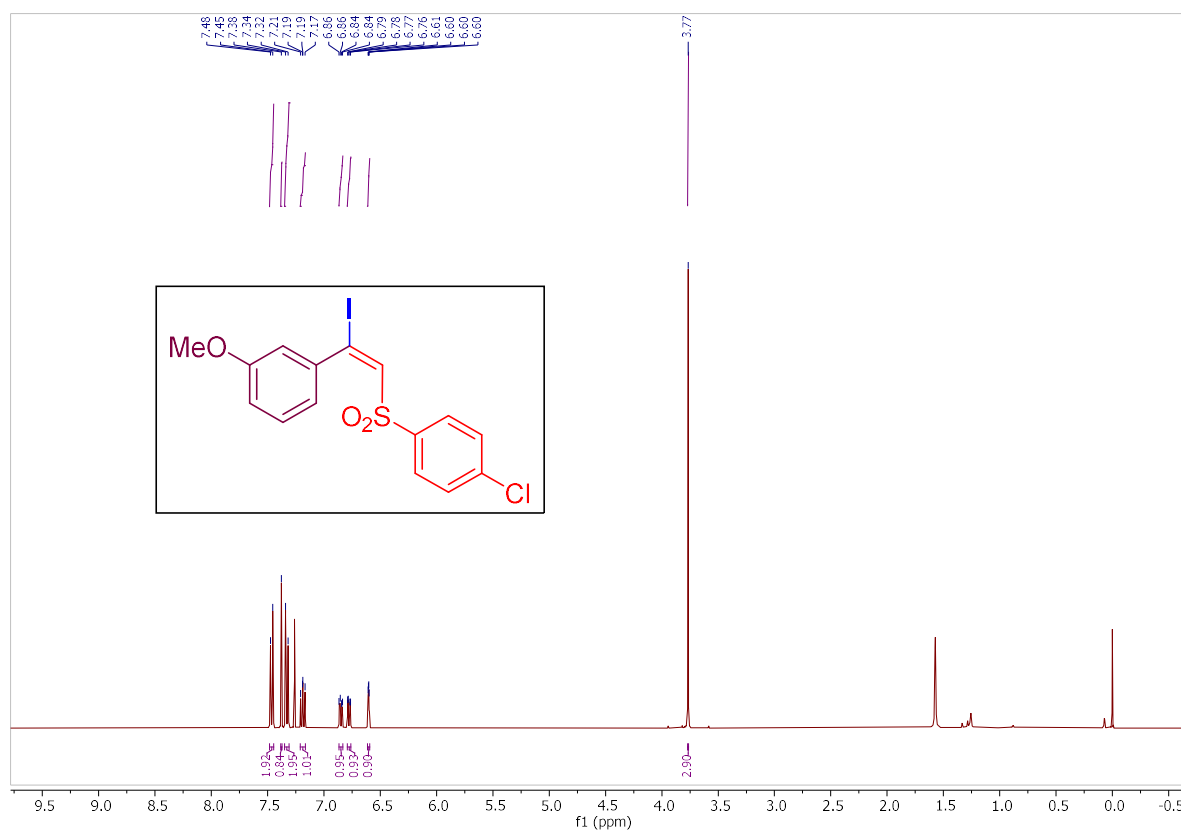 $^{13}\text{C}$  NMR Spectrum of compound **23** in  $\text{CDCl}_3$ 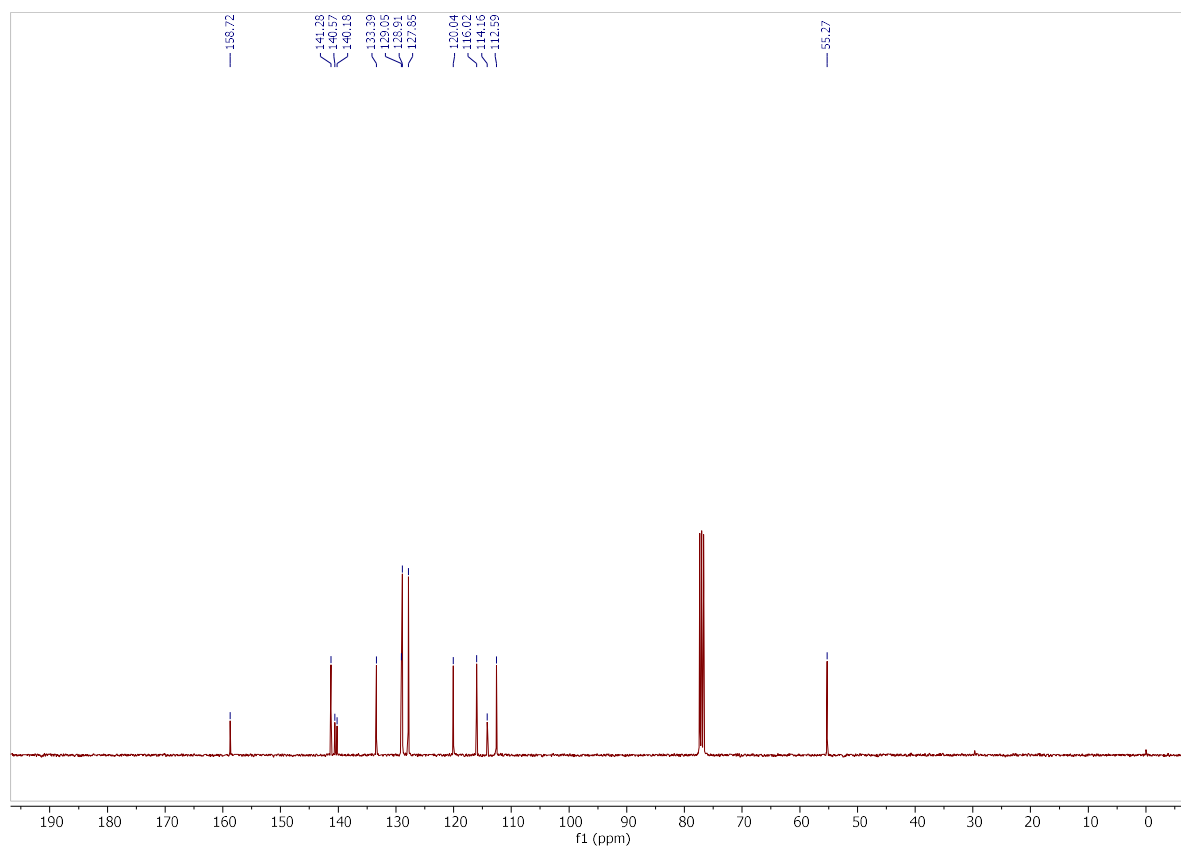

$^1\text{H}$  NMR Spectrum of compound **24** in  $\text{CDCl}_3$ 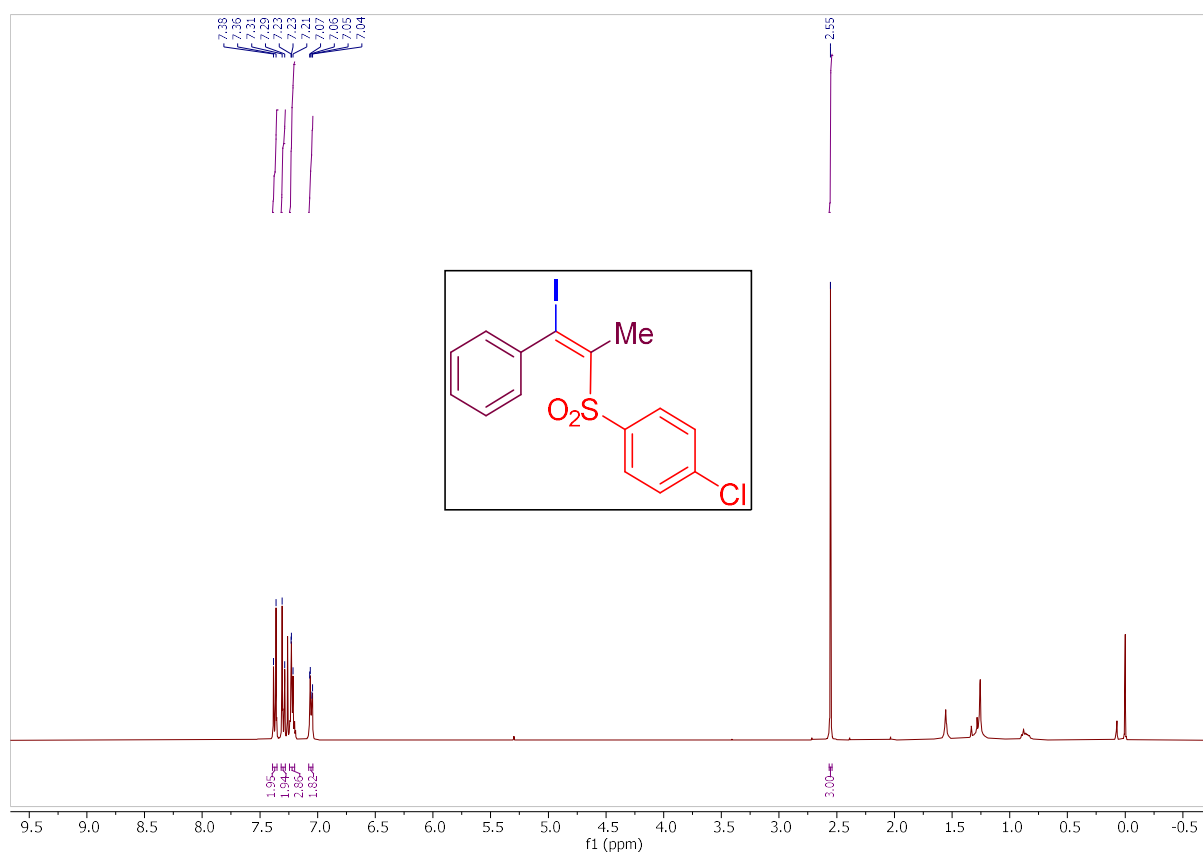 $^{13}\text{C}$  NMR Spectrum of compound **24** in  $\text{CDCl}_3$ 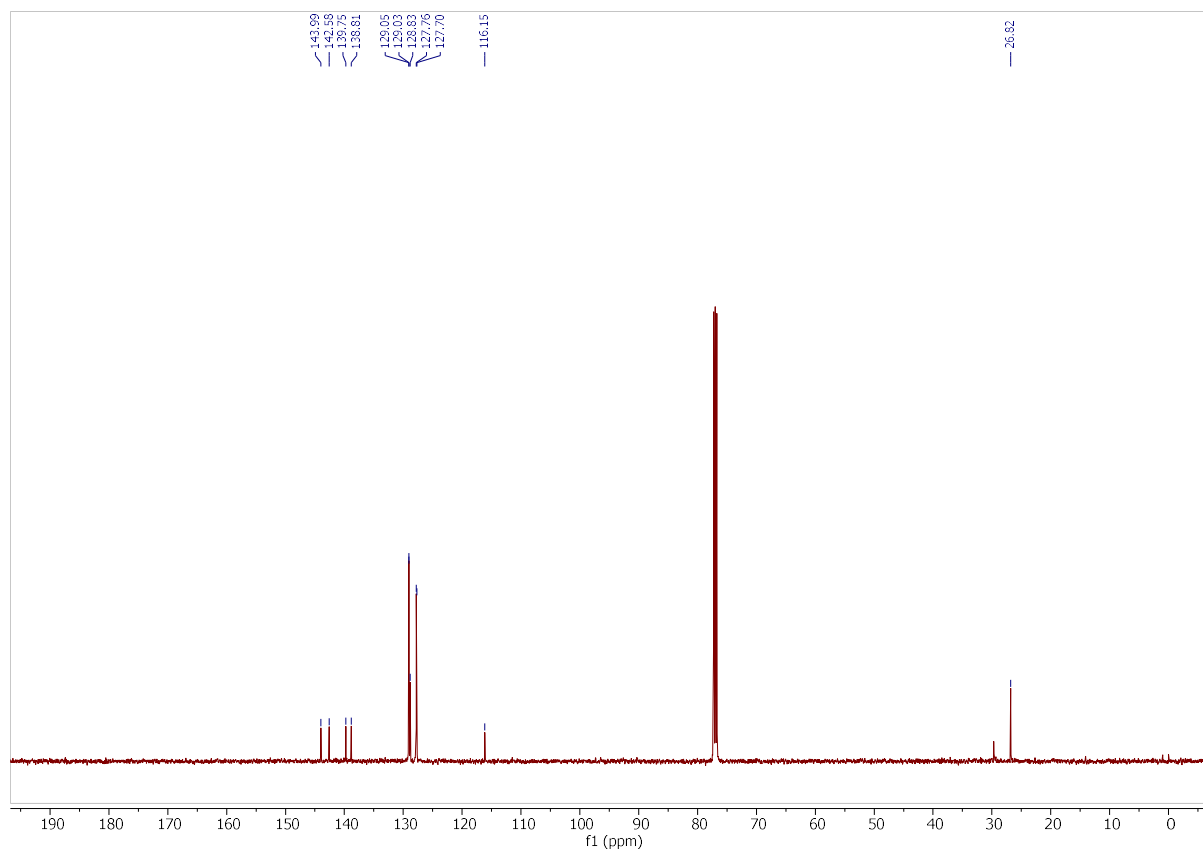

$^1\text{H}$ -NMR Spectrum of compound **25** in  $\text{CDCl}_3$ 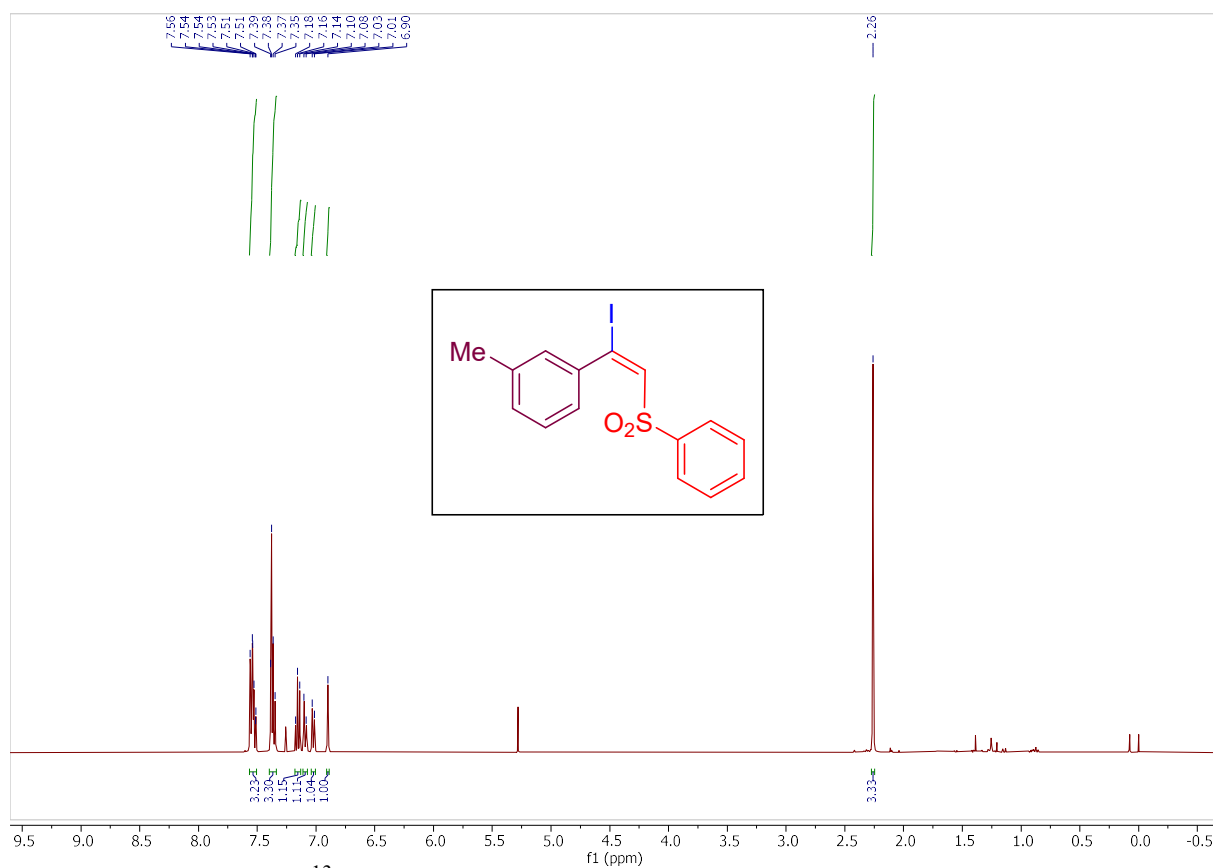 $^{13}\text{C}$ -NMR Spectrum of compound **25** in  $\text{CDCl}_3$ 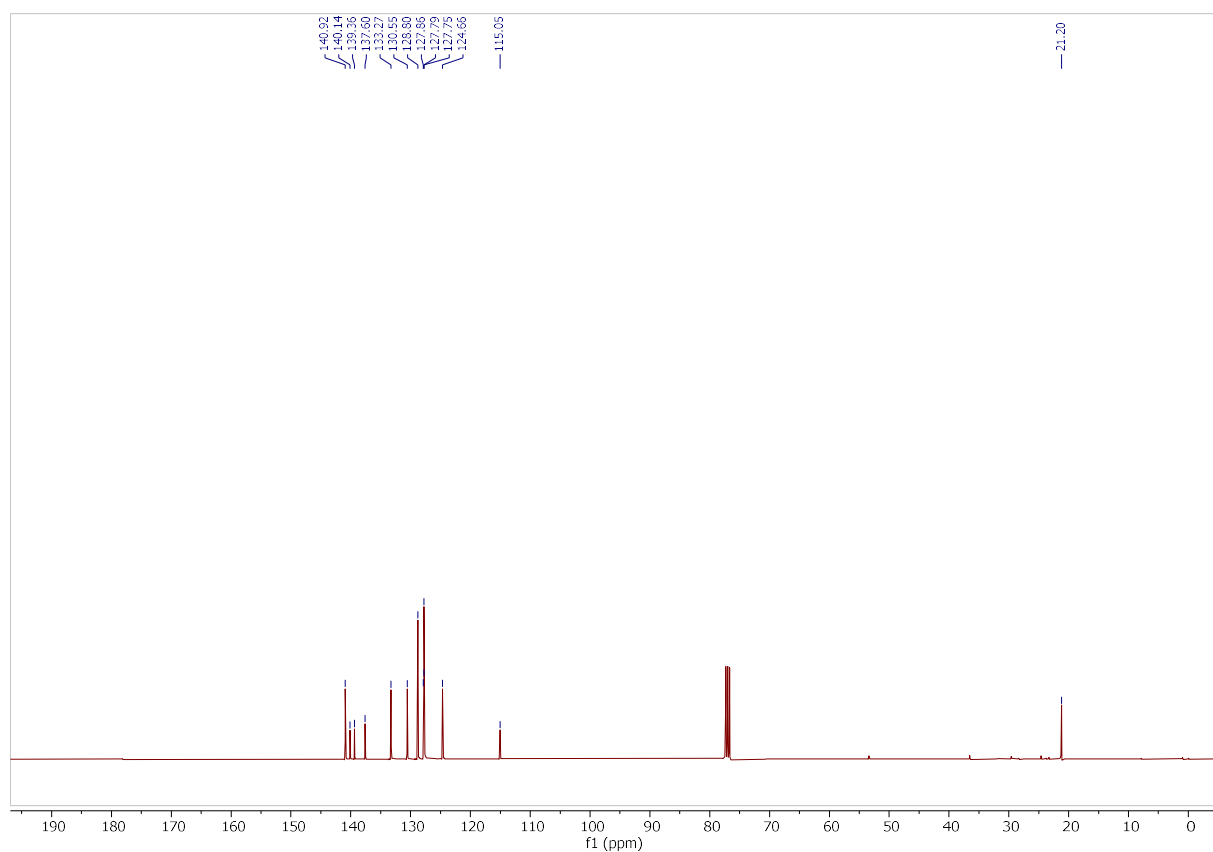

<sup>1</sup>H-NMR Spectrum of compound **26** in CDCl<sub>3</sub>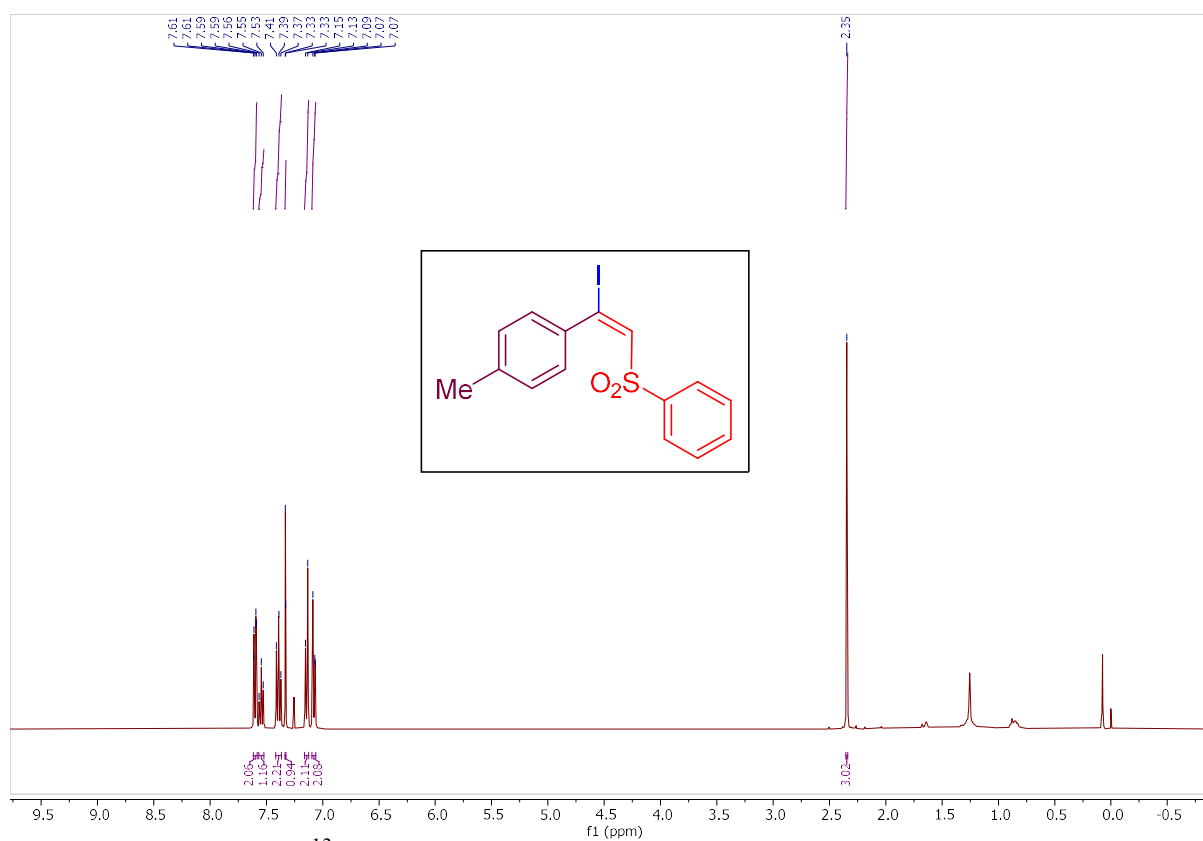<sup>13</sup>C-NMR Spectrum of compound **26** in CDCl<sub>3</sub>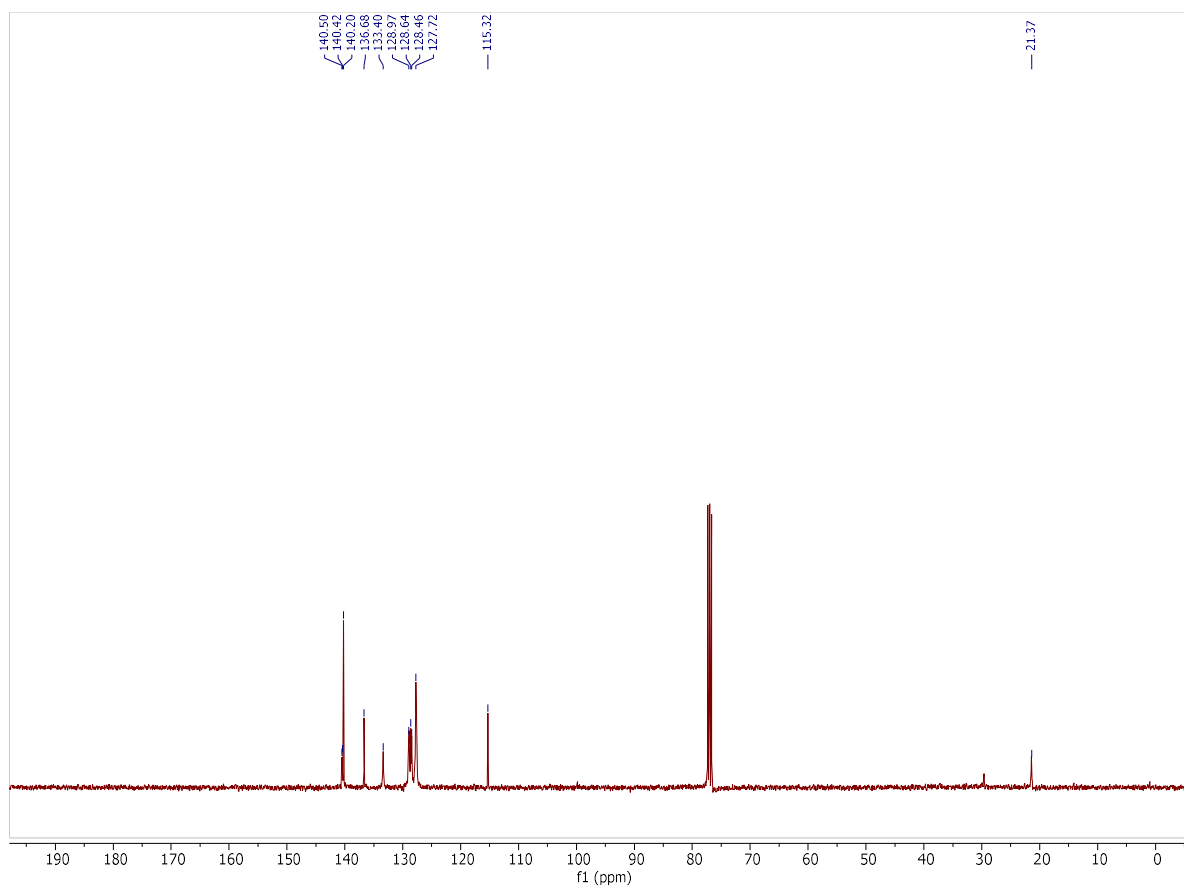



<sup>1</sup>H-NMR Spectrum of compound **27** in CDCl<sub>3</sub>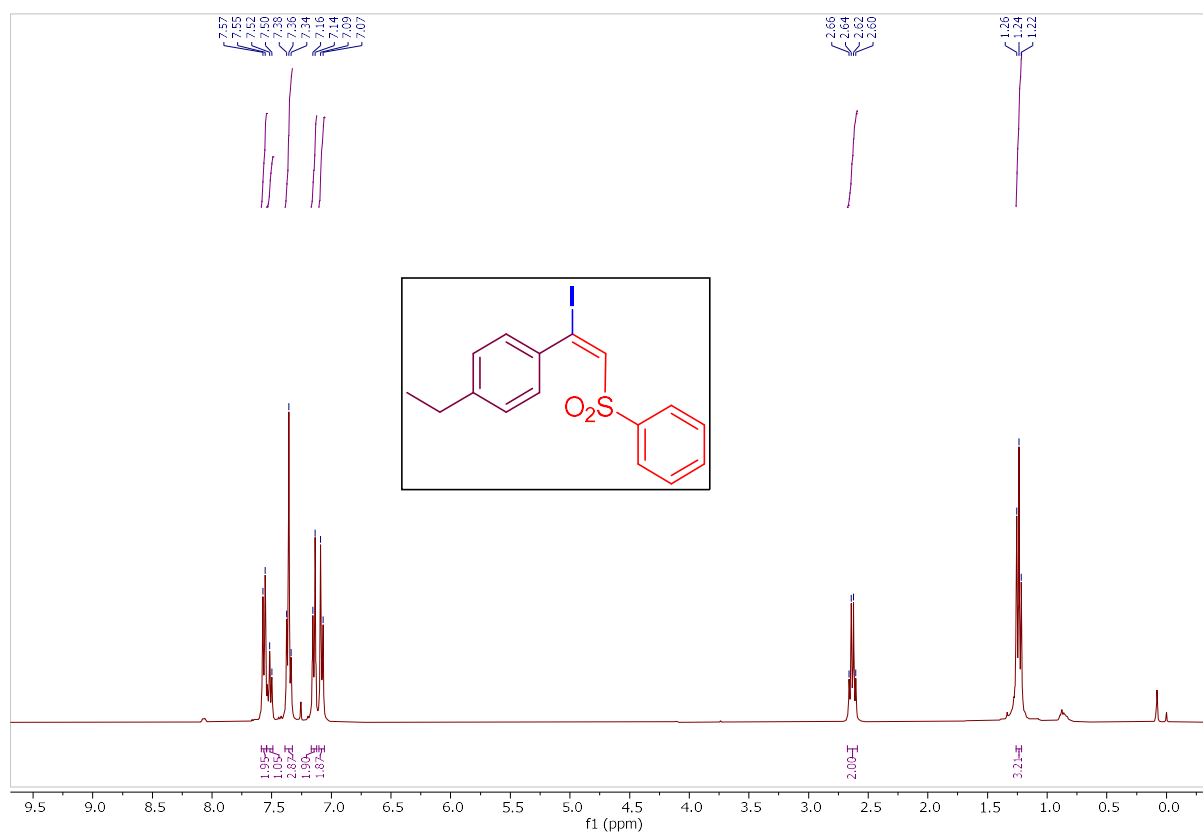<sup>13</sup>C-NMR Spectrum of compound **27** in CDCl<sub>3</sub>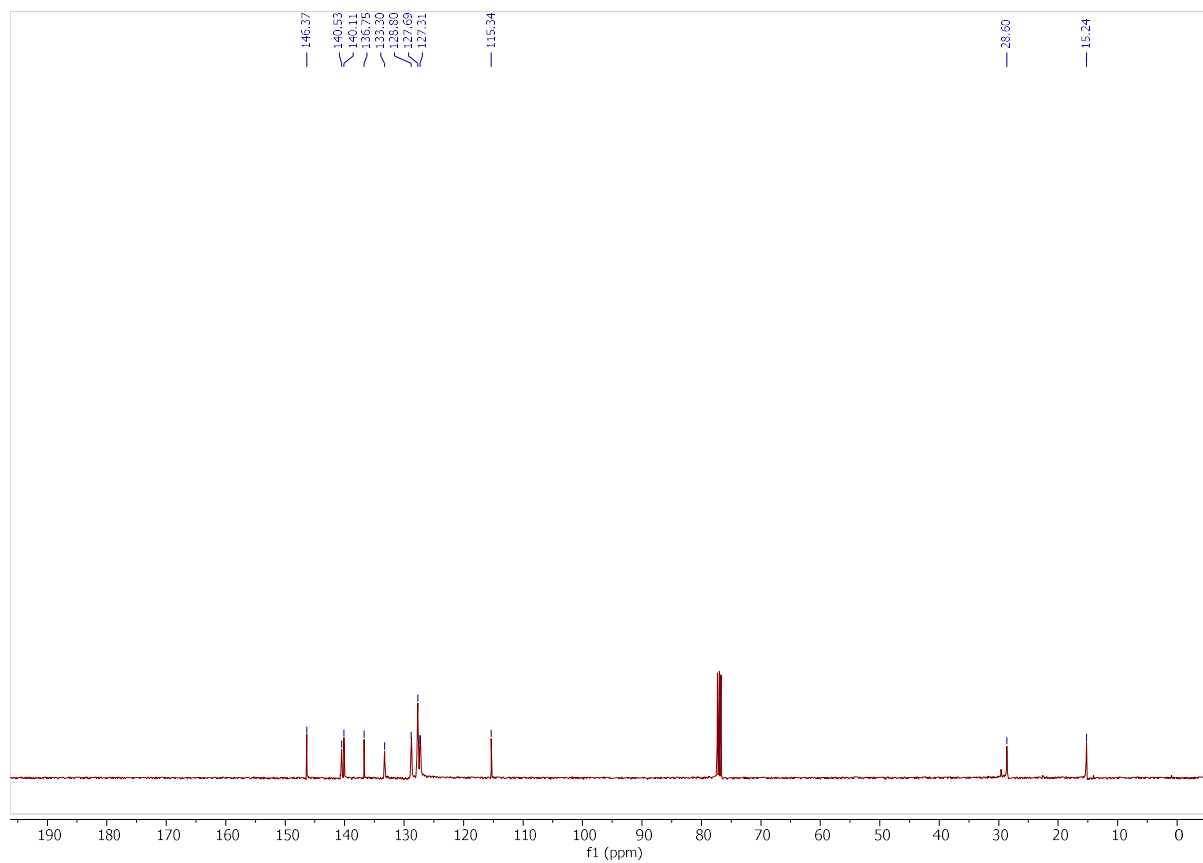

<sup>1</sup>H NMR Spectrum of compound **28** in CDCl<sub>3</sub>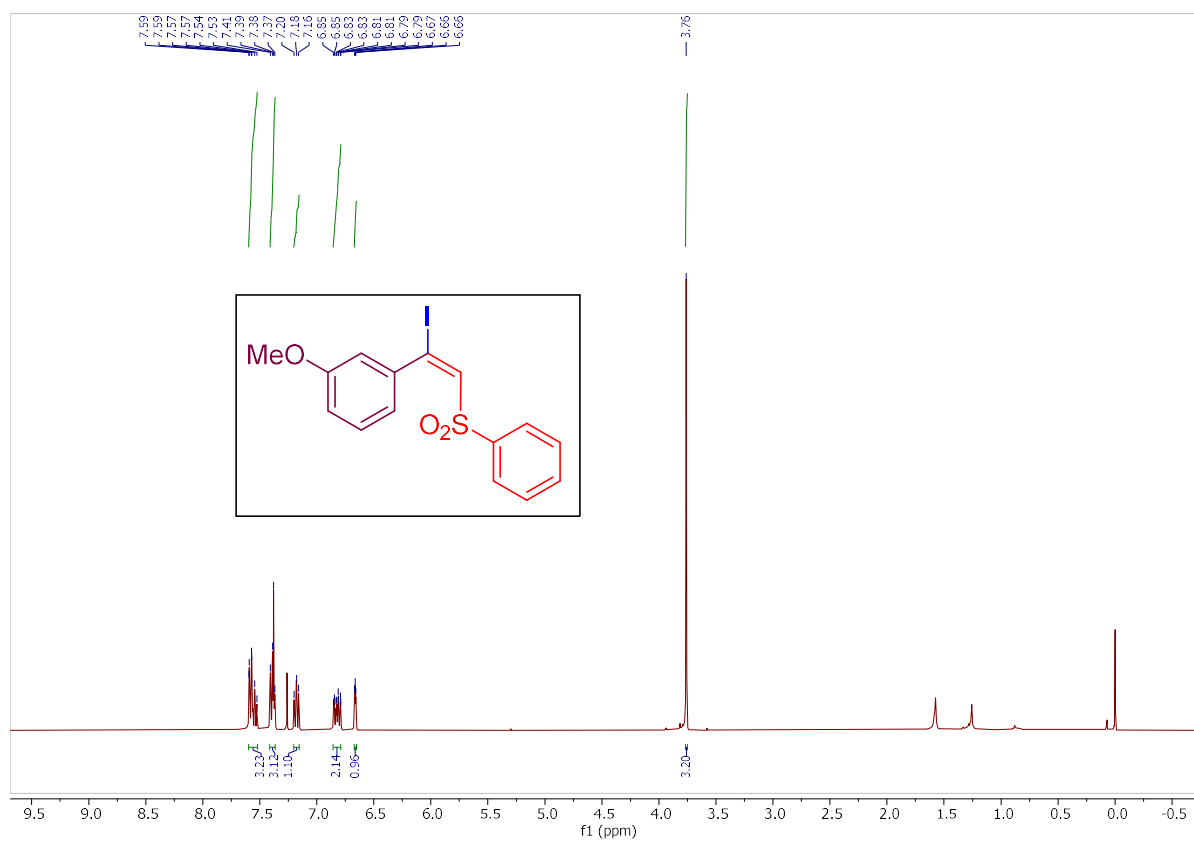<sup>13</sup>C NMR Spectrum of compound **28** in CDCl<sub>3</sub>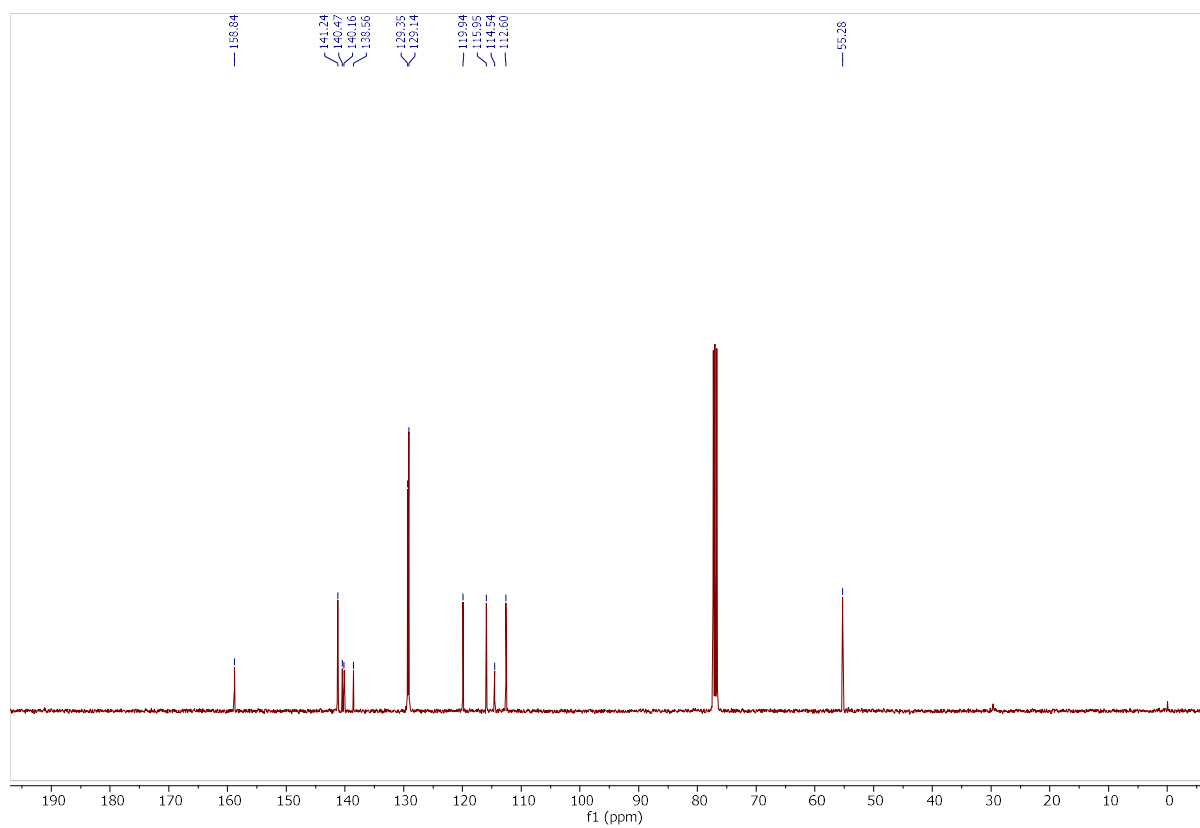

$^1\text{H}$ -NMR Spectrum of compound **29** in  $\text{CDCl}_3$ 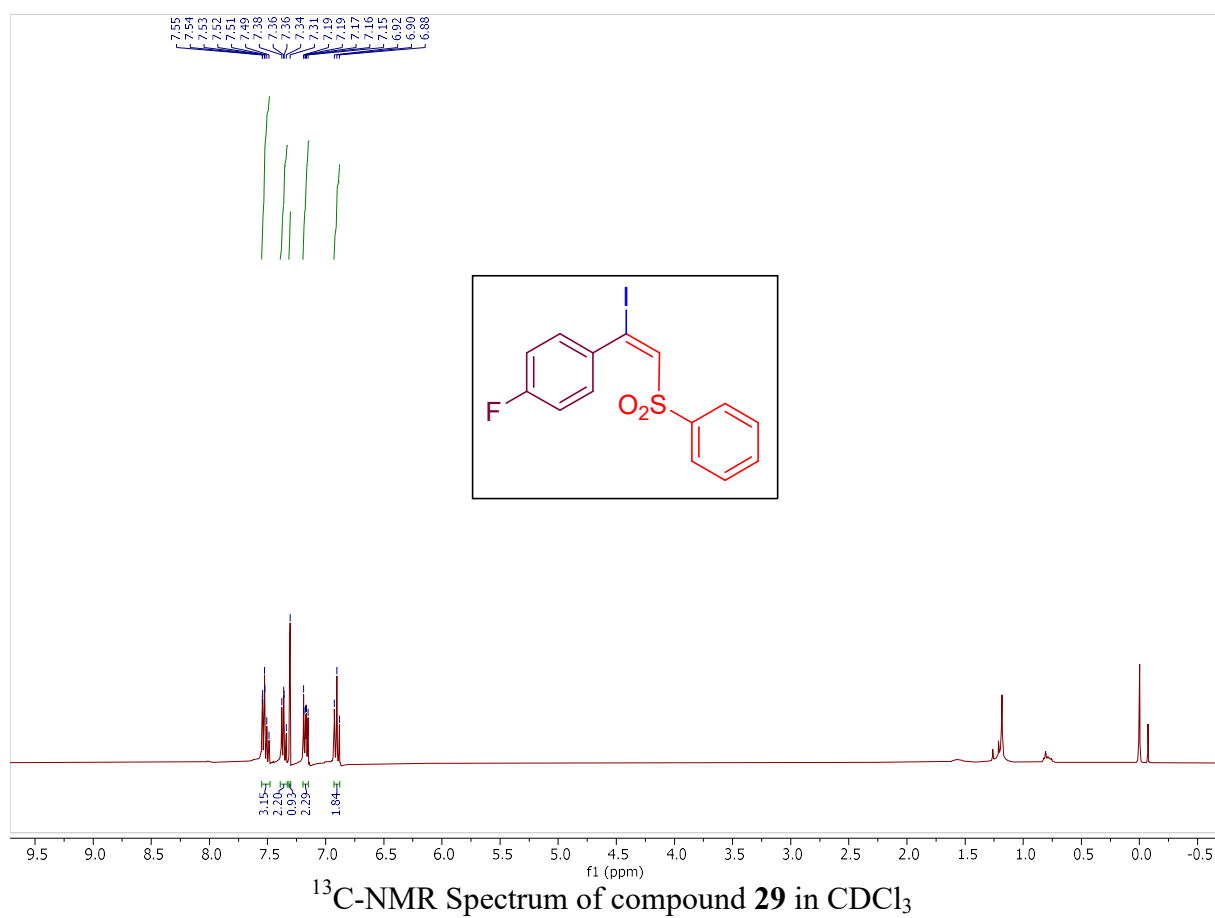 $^{13}\text{C}$ -NMR Spectrum of compound **29** in  $\text{CDCl}_3$ 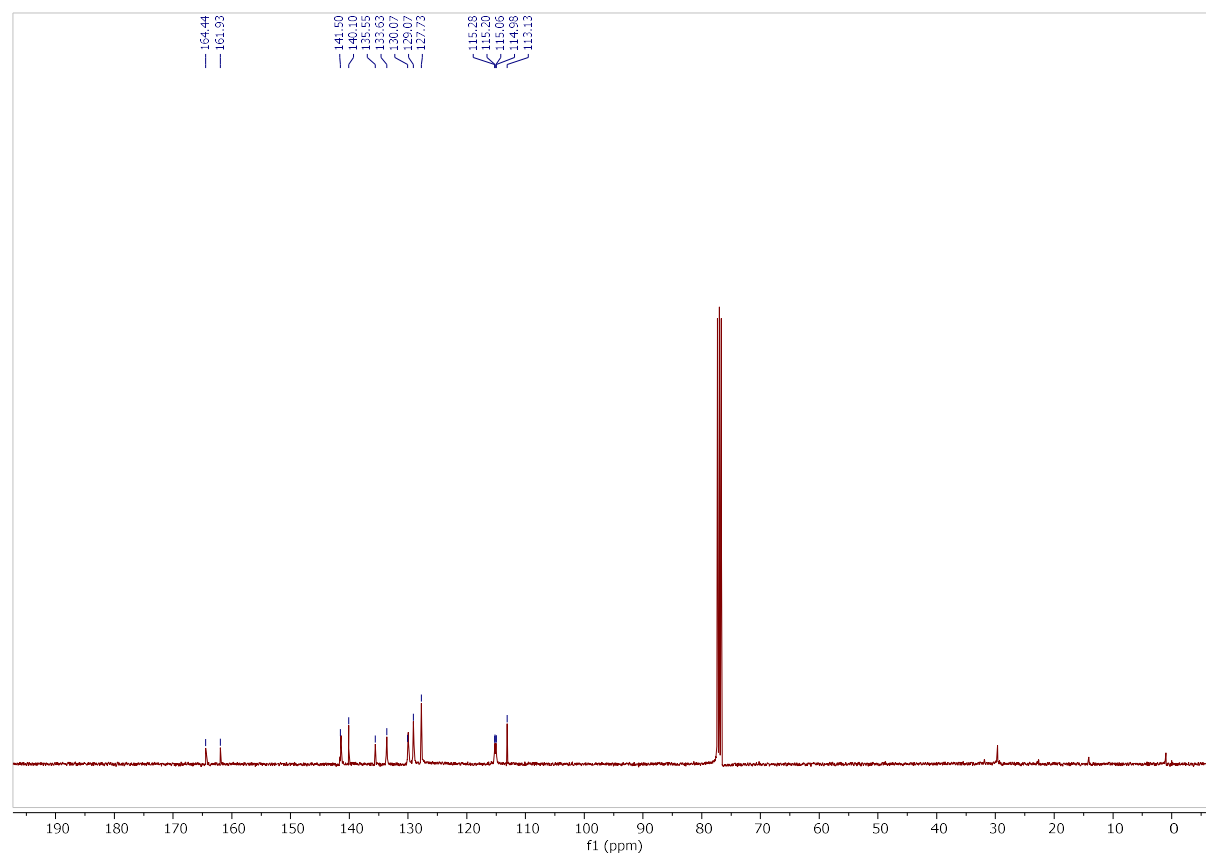

<sup>1</sup>H-NMR Spectrum of compound **30** in CDCl<sub>3</sub>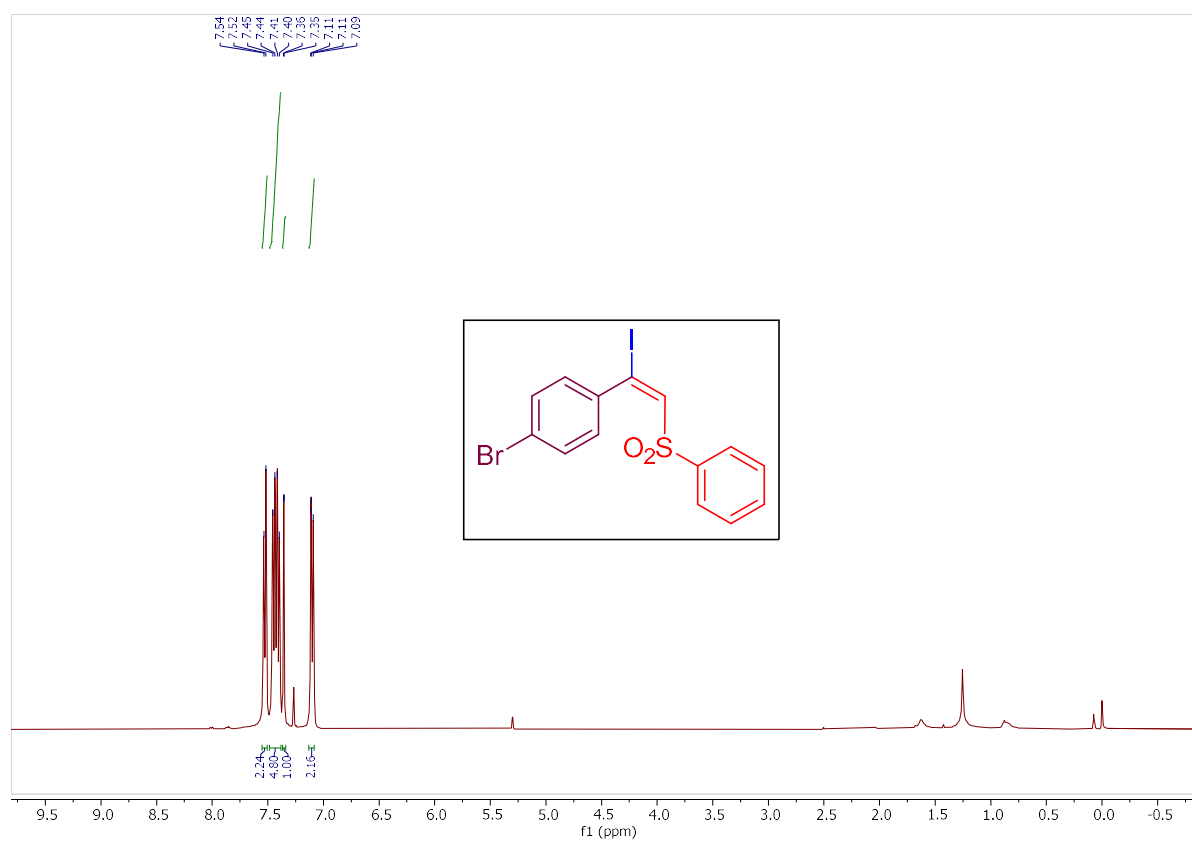<sup>13</sup>C-NMR Spectrum of compound **30** in CDCl<sub>3</sub>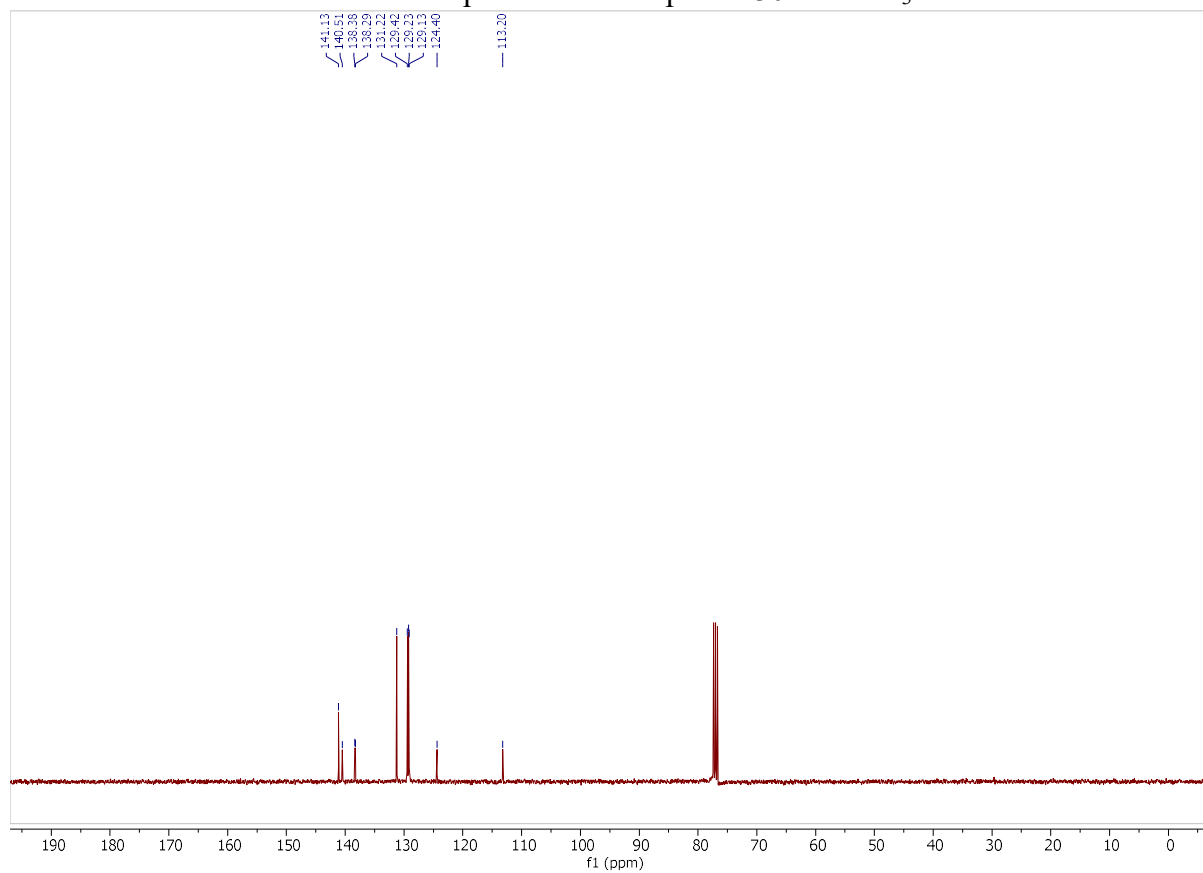

<sup>1</sup>H-NMR Spectrum of compound **31** in CDCl<sub>3</sub>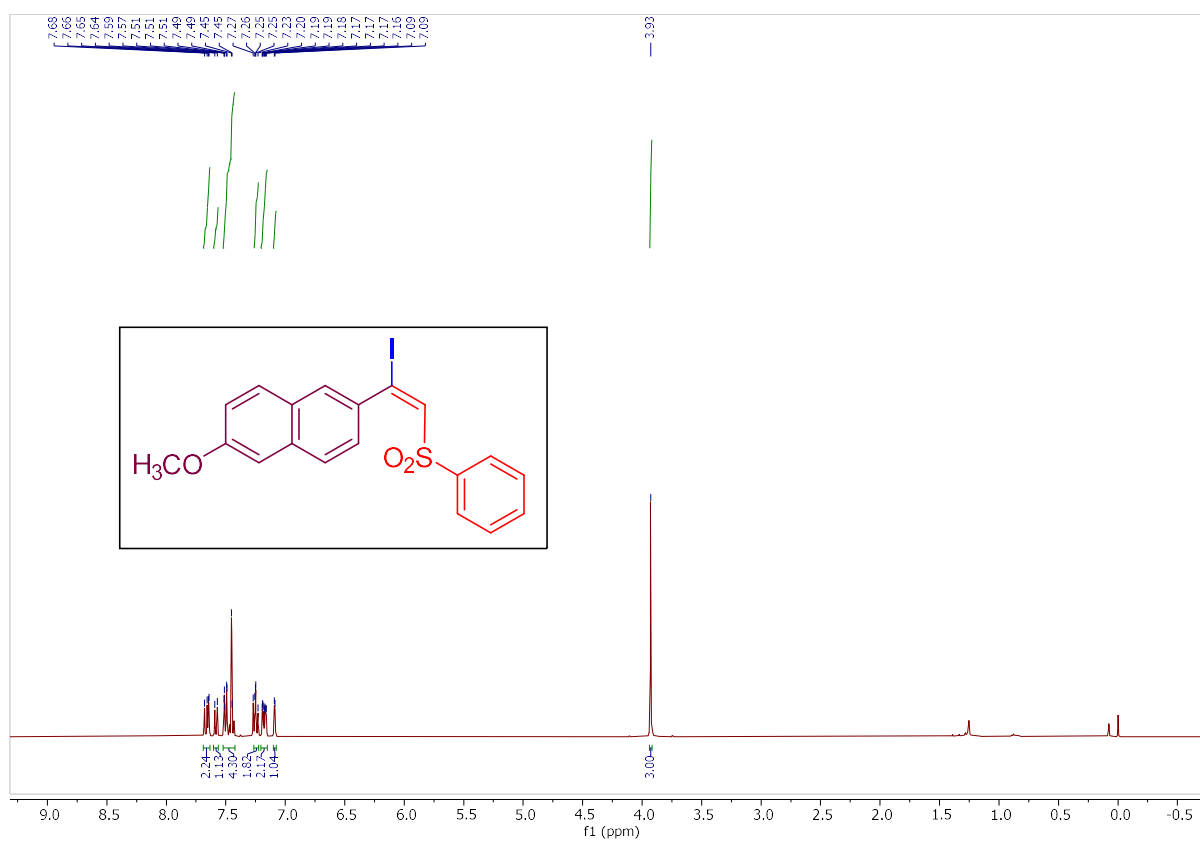<sup>13</sup>C-NMR Spectrum of compound **31** in CDCl<sub>3</sub>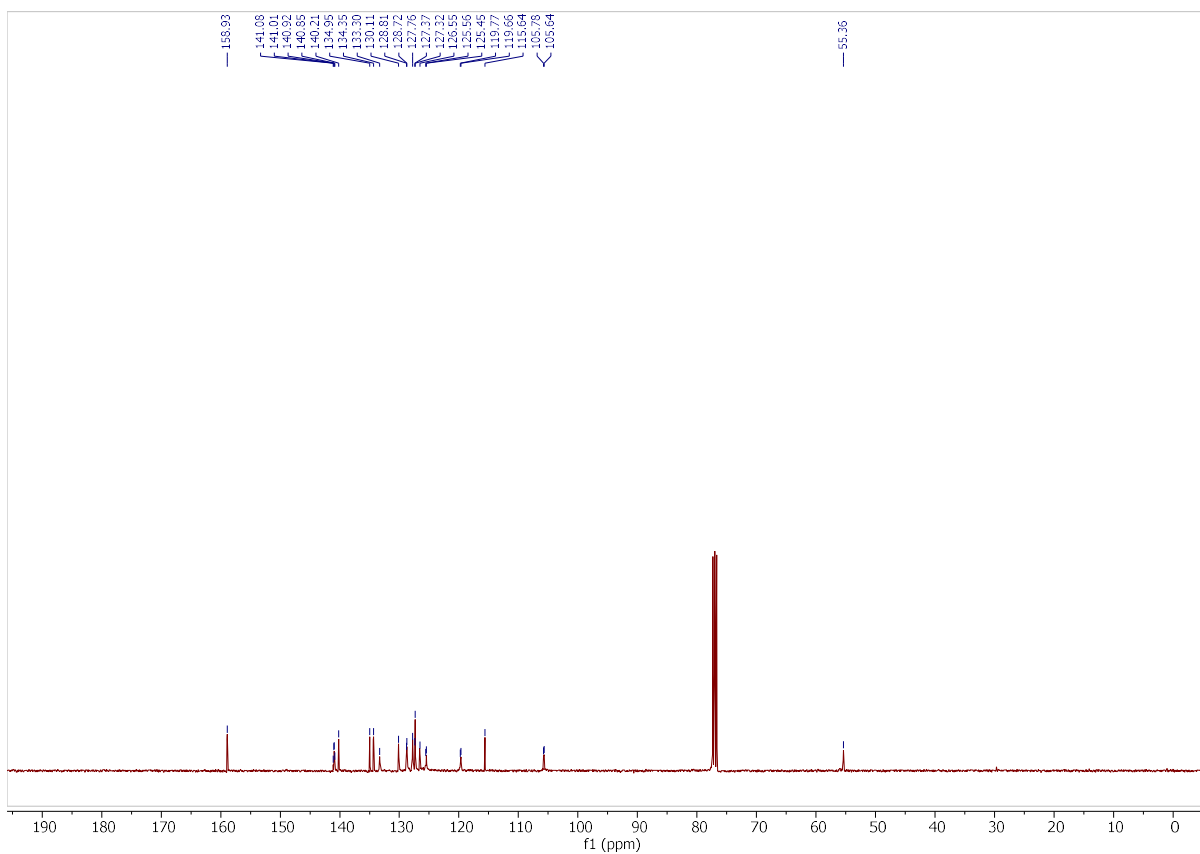

<sup>1</sup>H-NMR Spectrum of compound **32** in CDCl<sub>3</sub>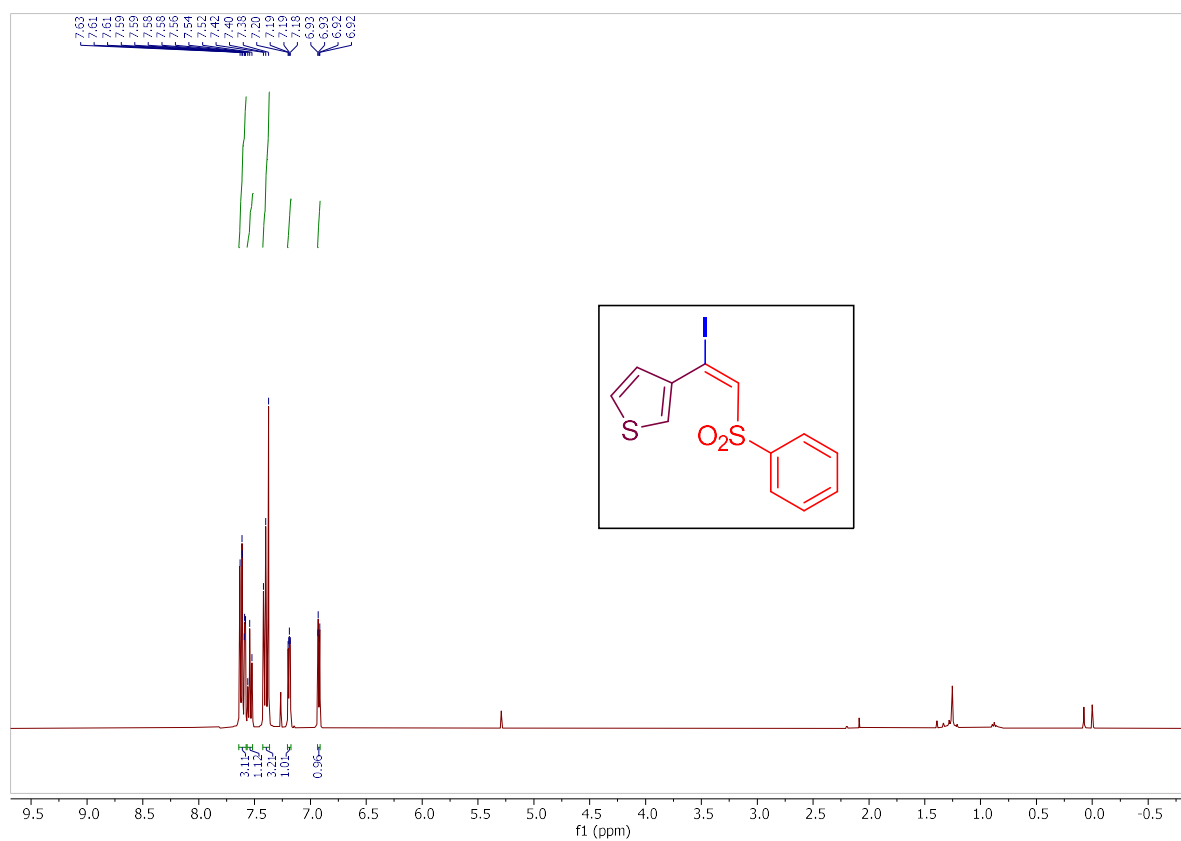<sup>13</sup>C-NMR Spectrum of compound **32** in CDCl<sub>3</sub>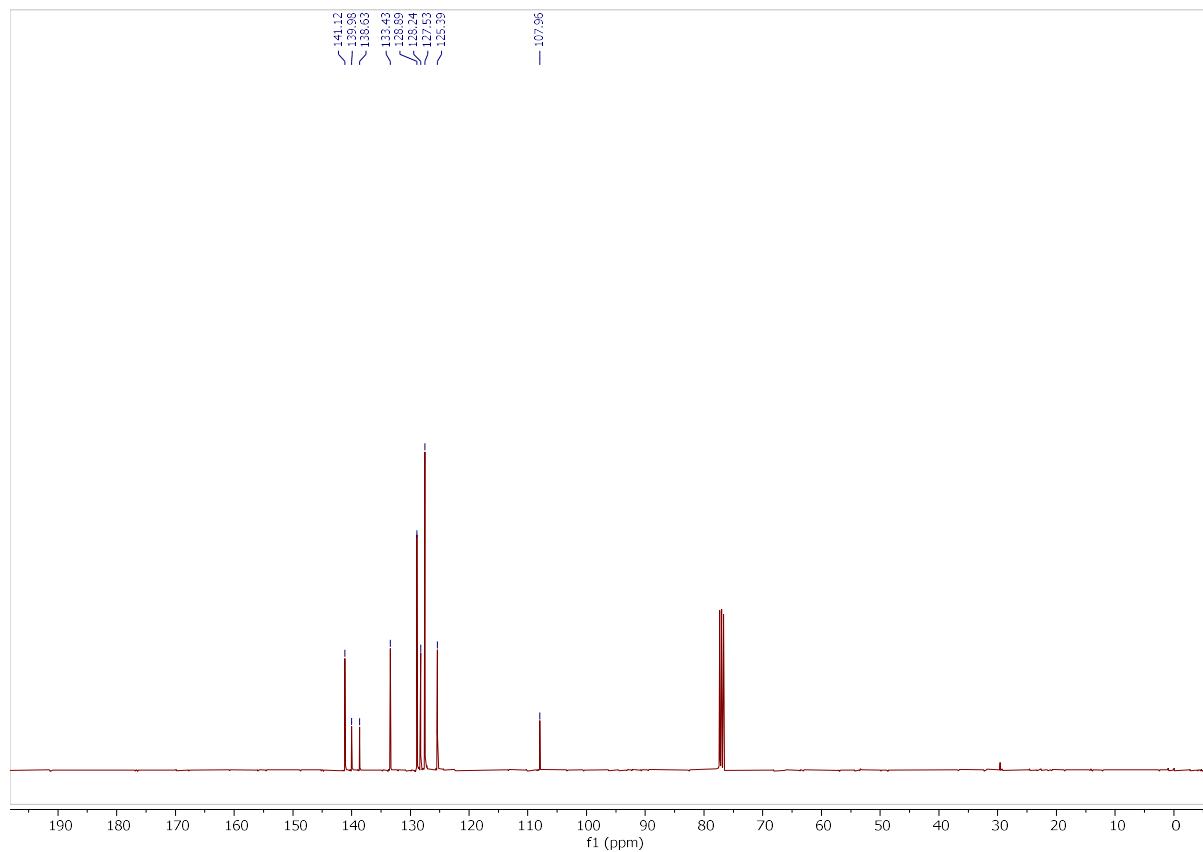

<sup>1</sup>H-NMR Spectrum of compound **33** in CDCl<sub>3</sub>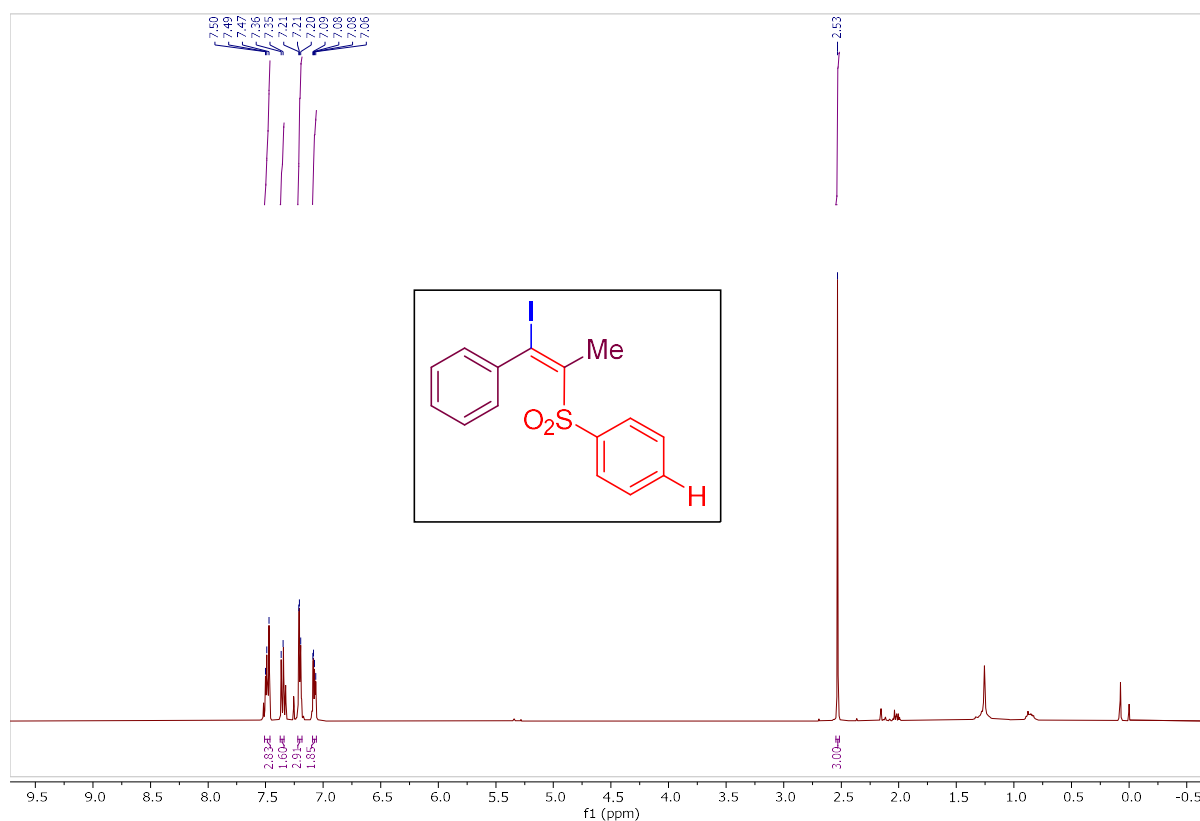<sup>13</sup>C-NMR Spectrum of compound **33** in CDCl<sub>3</sub>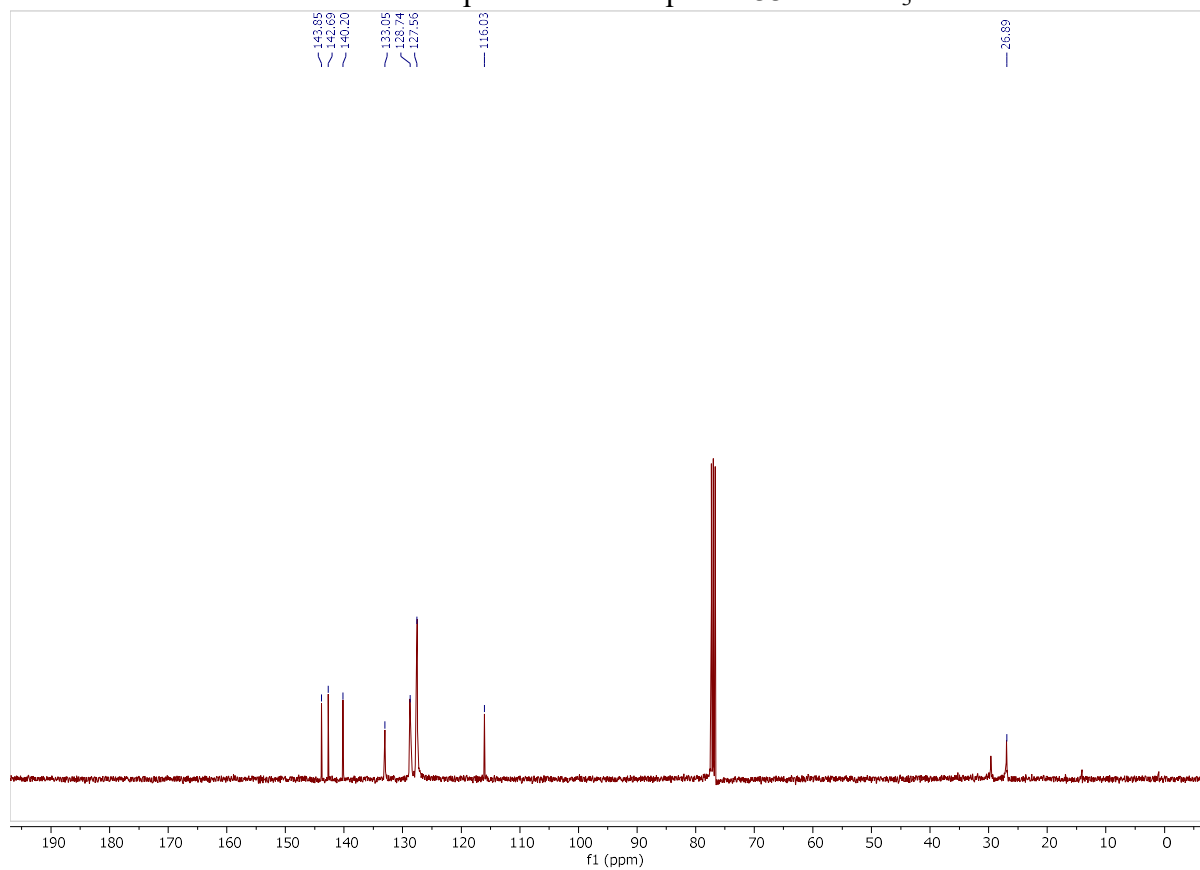

$^1\text{H}$ -NMR Spectrum of compound **34** in  $\text{CDCl}_3$ 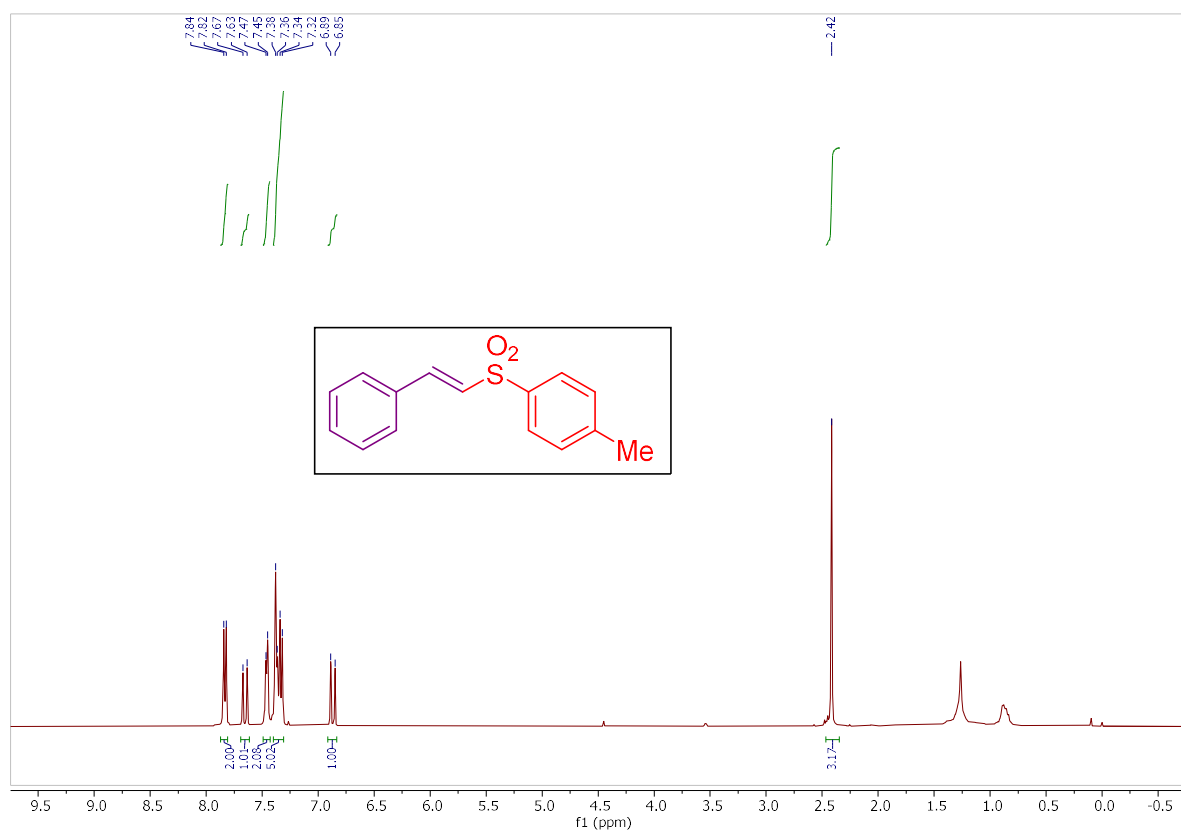 $^{13}\text{C}$ -NMR Spectrum of compound **34** in  $\text{CDCl}_3$ 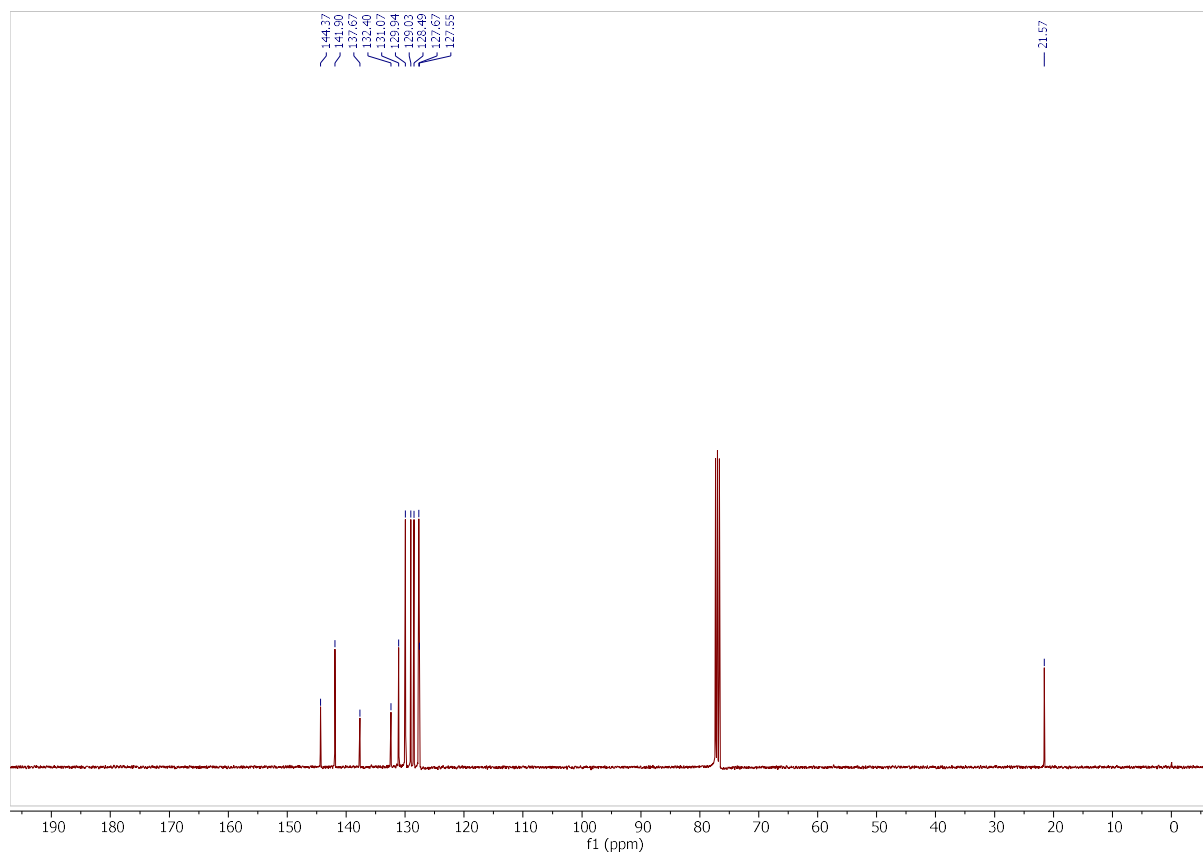



$^1\text{H}$ -NMR Spectrum of compound **35** in  $\text{CDCl}_3$ 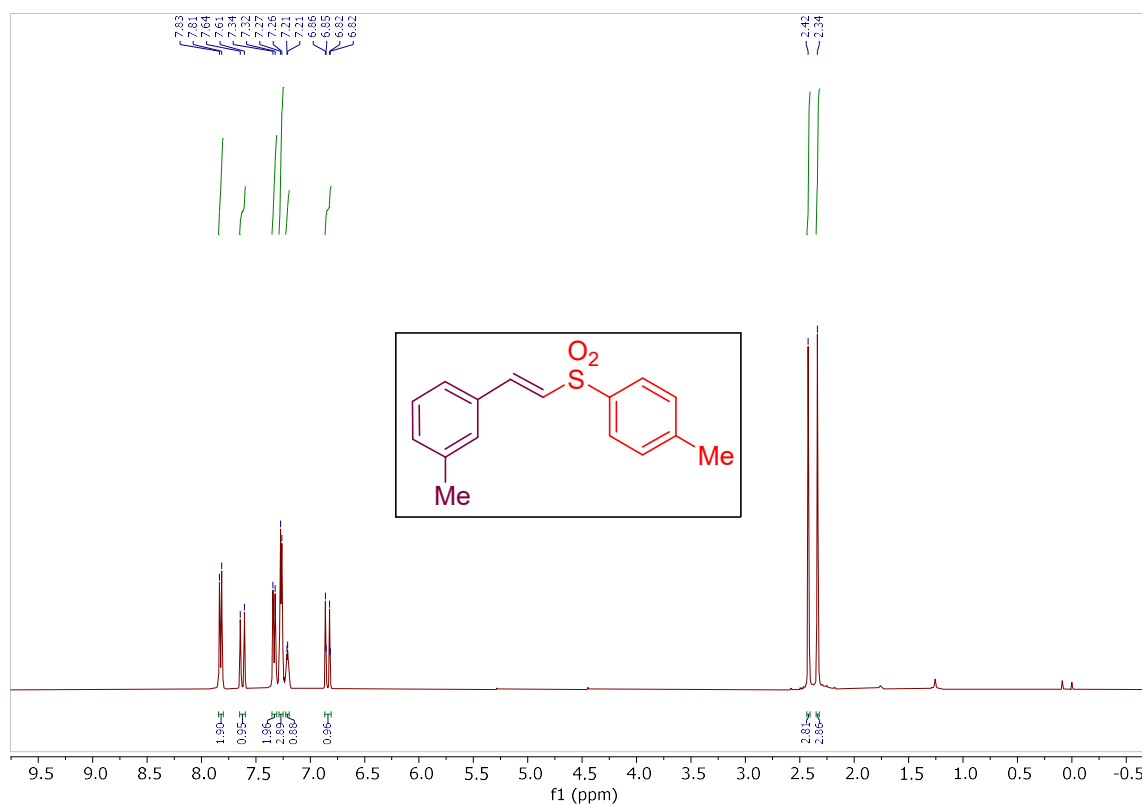 $^{13}\text{C}$ -NMR Spectrum of compound **35** in  $\text{CDCl}_3$ 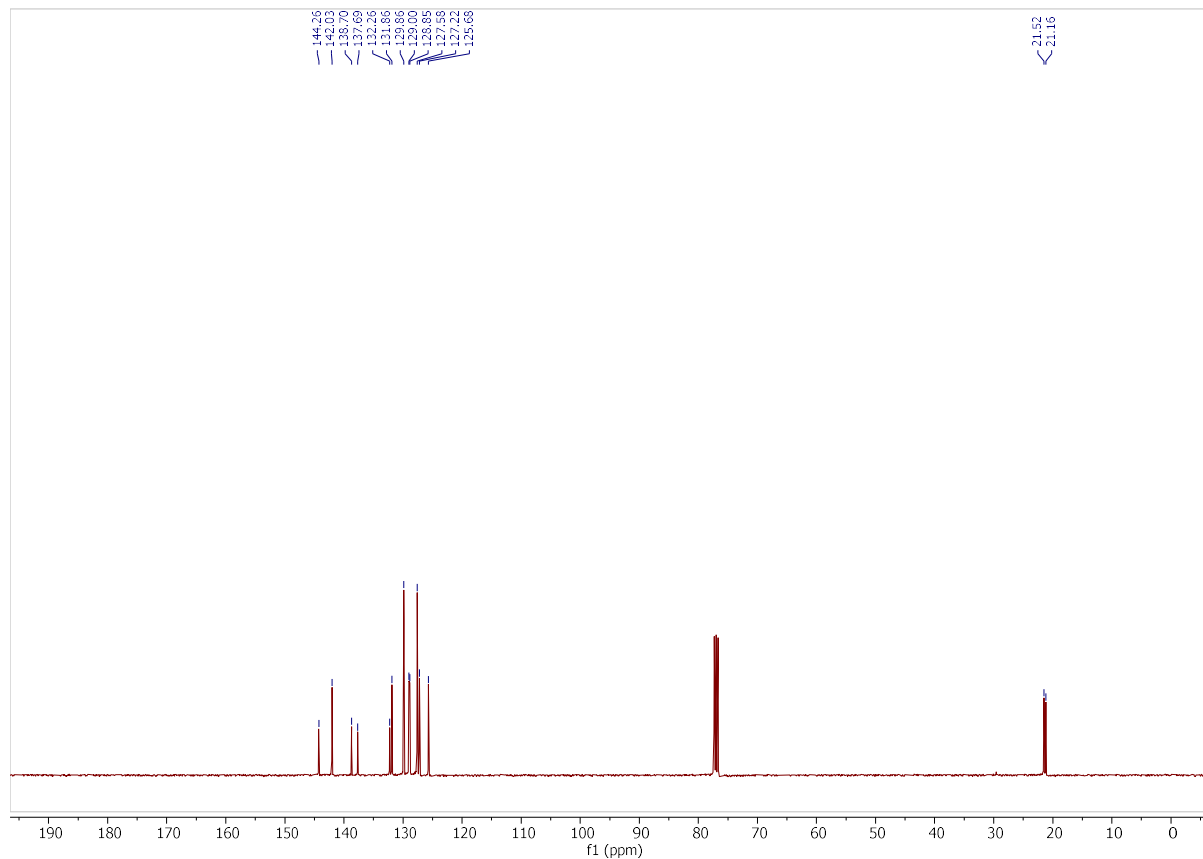

$^1\text{H}$ -NMR Spectrum of compound **36** in  $\text{CDCl}_3$ 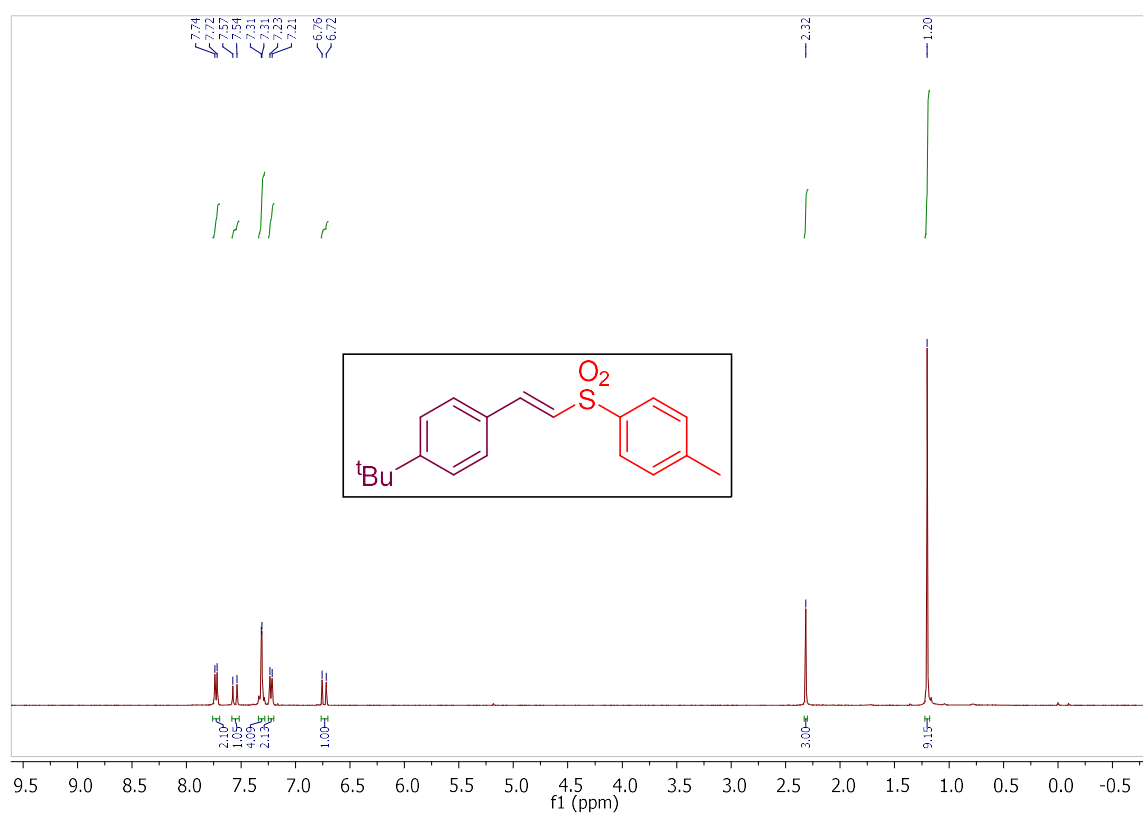 $^{13}\text{C}$ -NMR Spectrum of compound **36** in  $\text{CDCl}_3$ 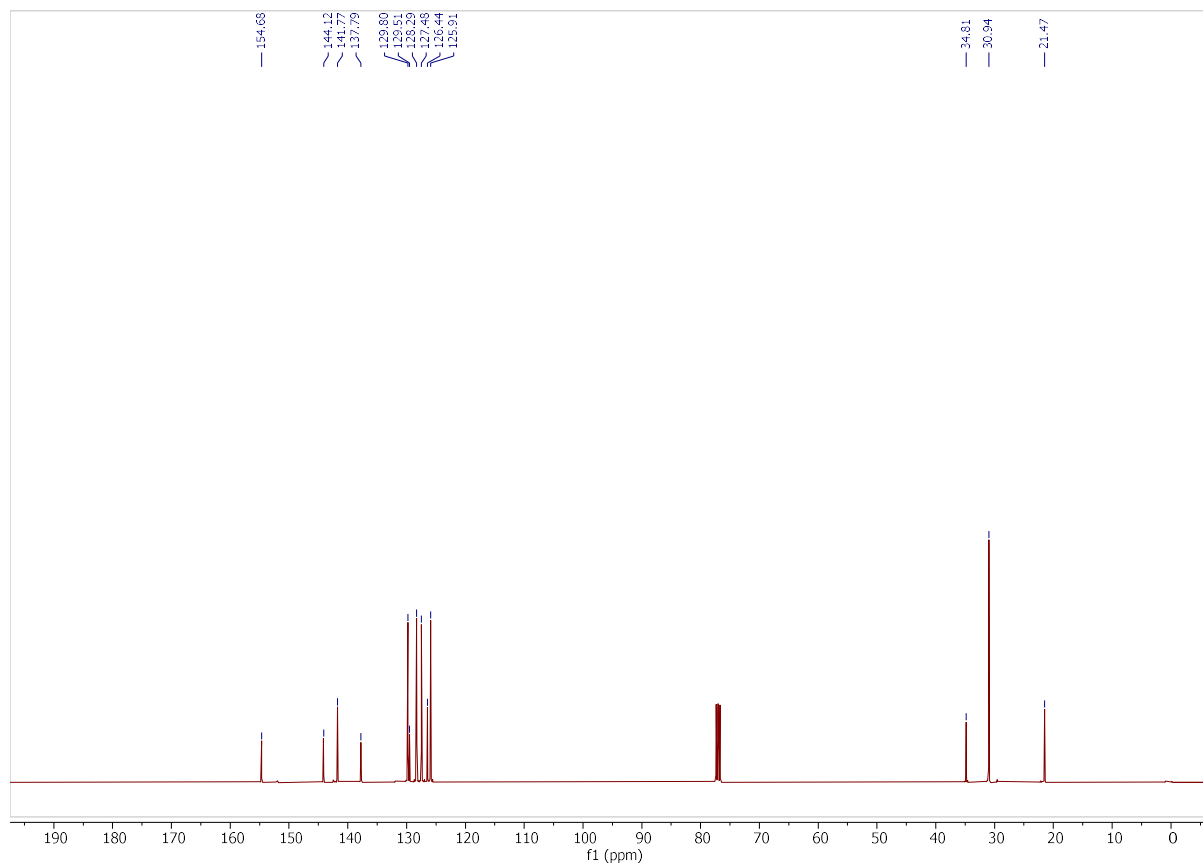

$^1\text{H}$ -NMR Spectrum of compound **37** in  $\text{CDCl}_3$ 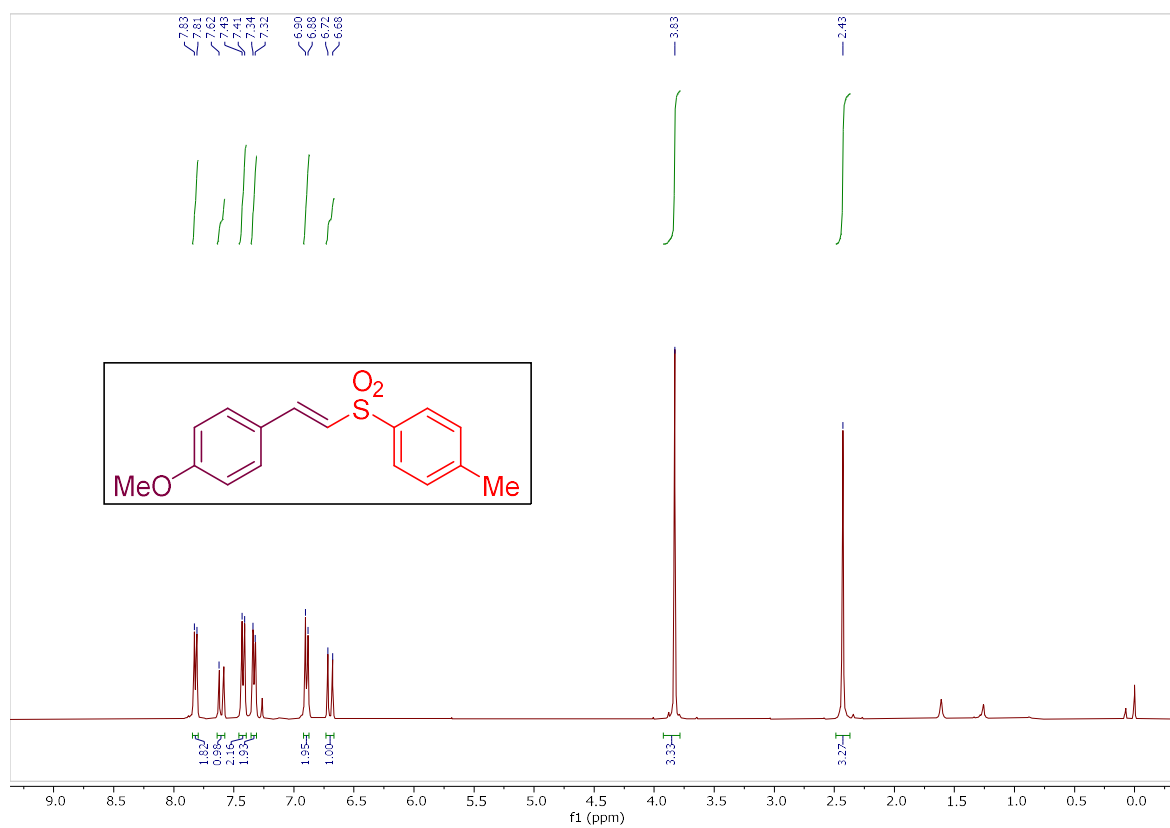 $^{13}\text{C}$ -NMR Spectrum of compound **37** in  $\text{CDCl}_3$ 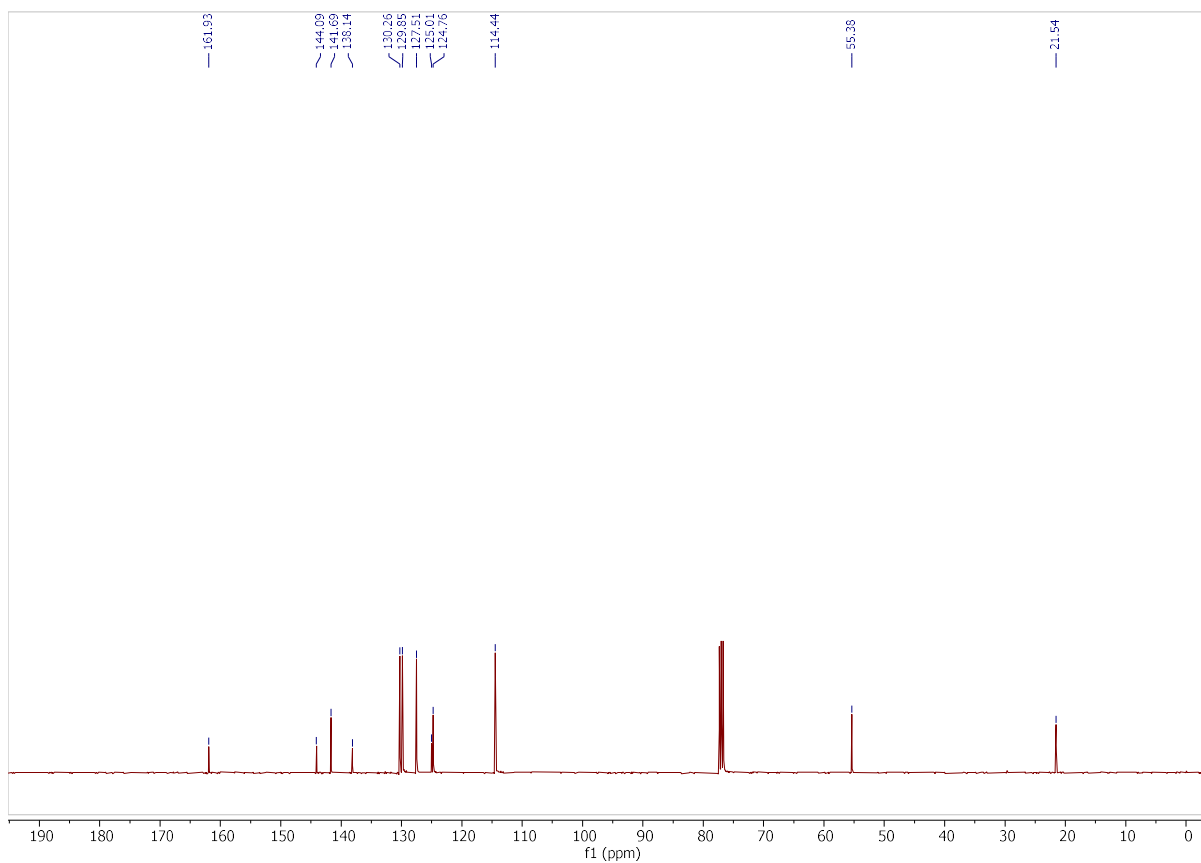

$^1\text{H}$ -NMR Spectrum of compound **38** in  $\text{CDCl}_3$ 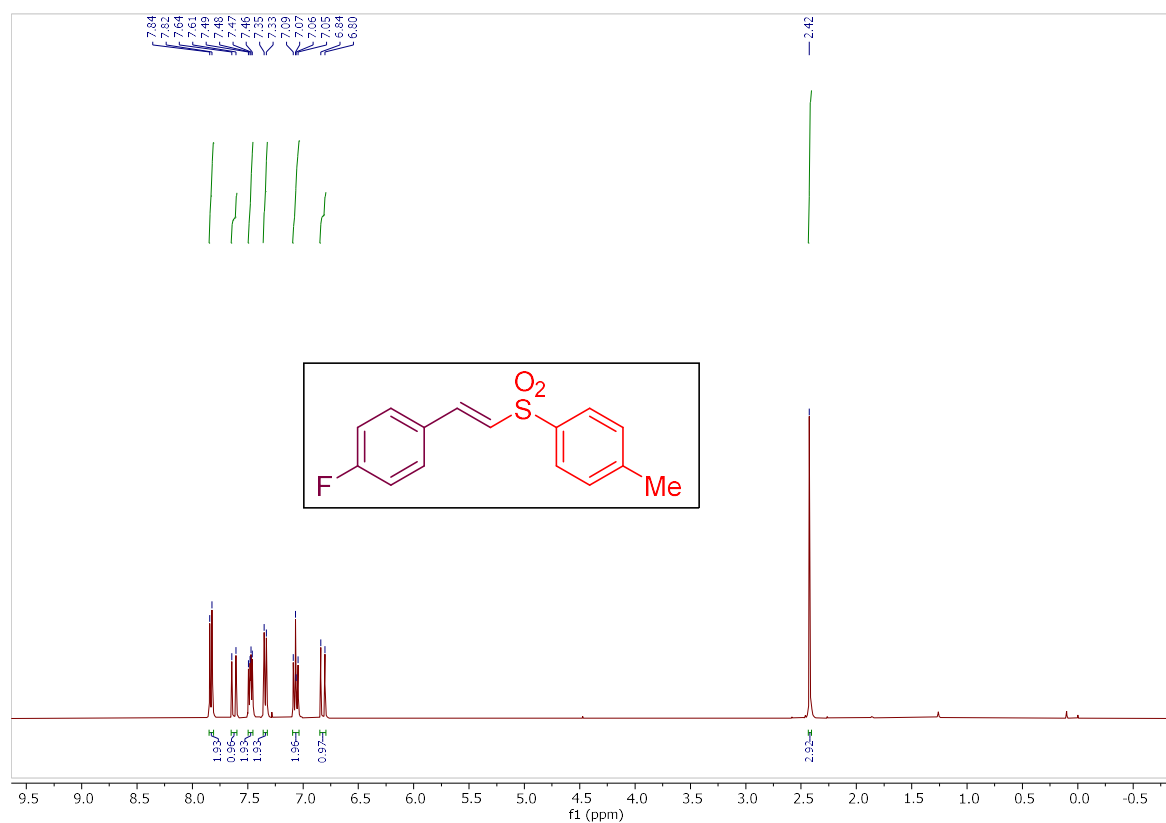 $^{13}\text{C}$ -NMR Spectrum of compound **38** in  $\text{CDCl}_3$ 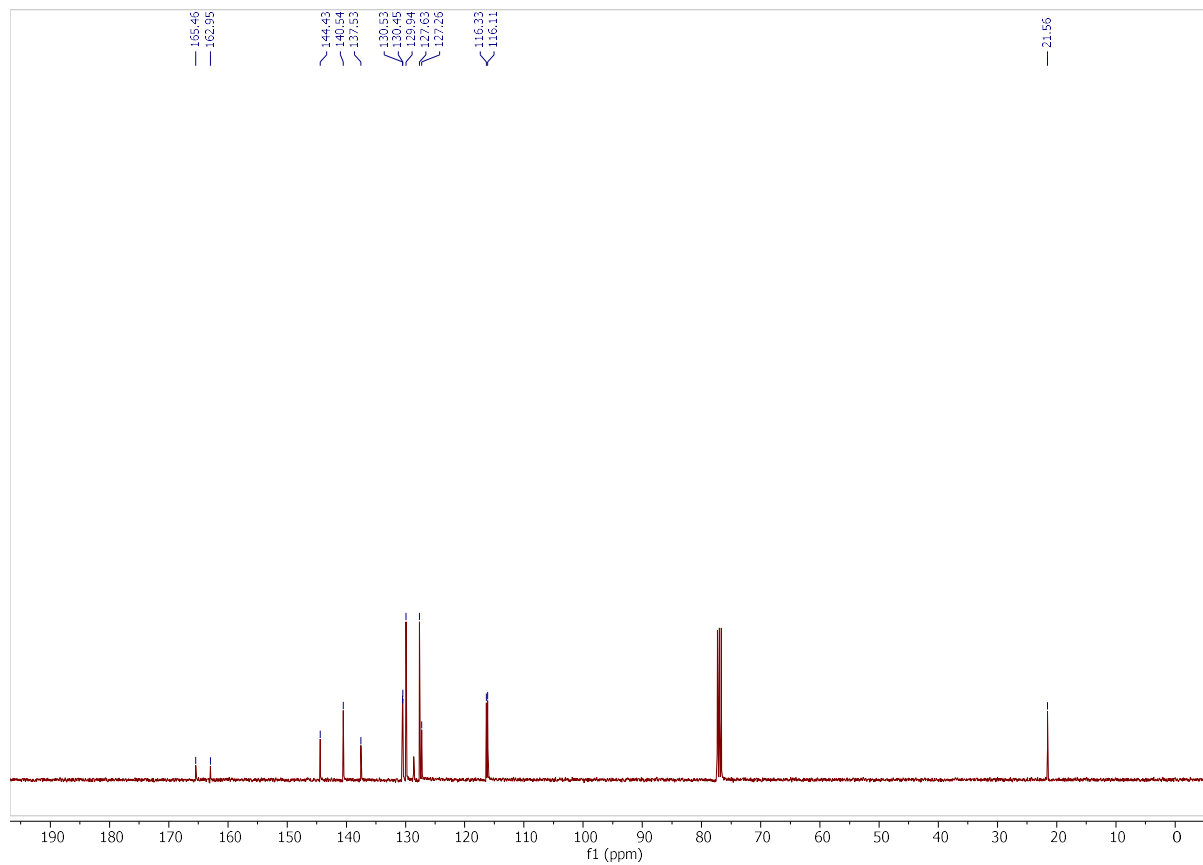

<sup>1</sup>H-NMR Spectrum of compound **39** in CDCl<sub>3</sub>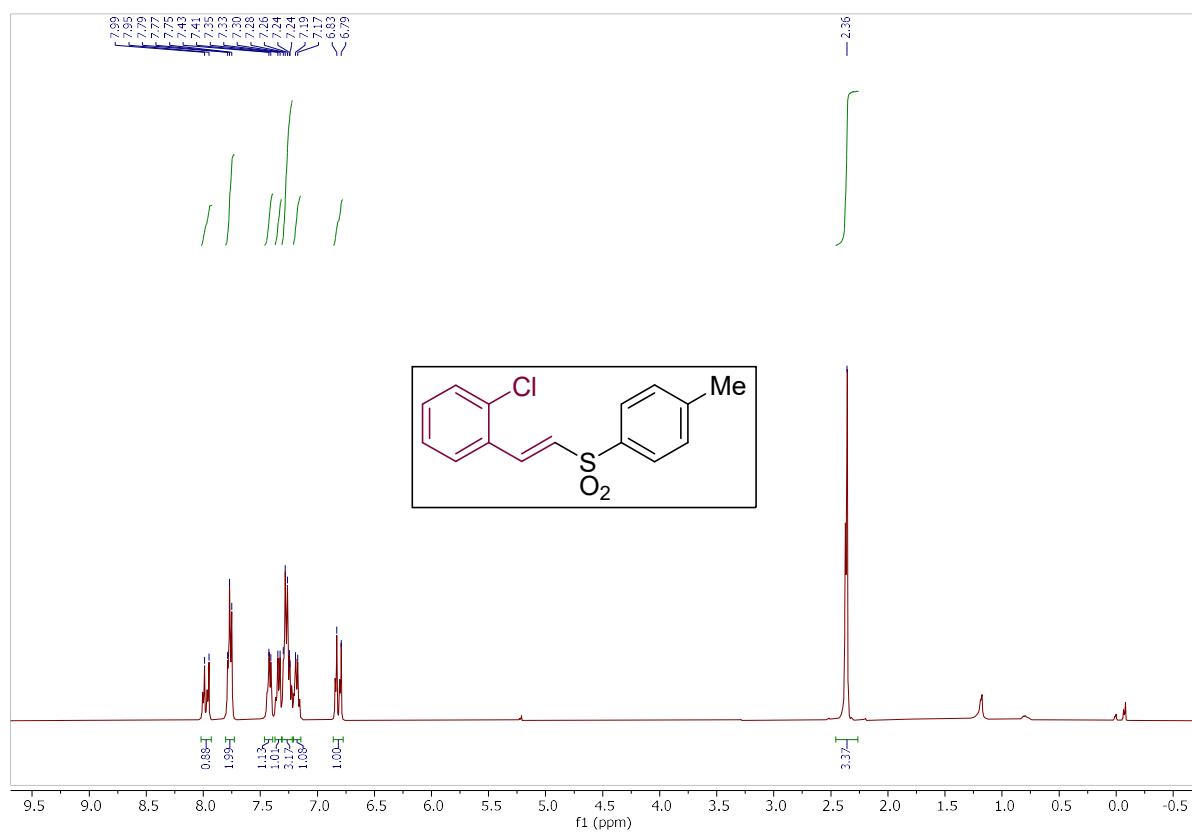<sup>13</sup>C-NMR Spectrum of compound **39** in CDCl<sub>3</sub>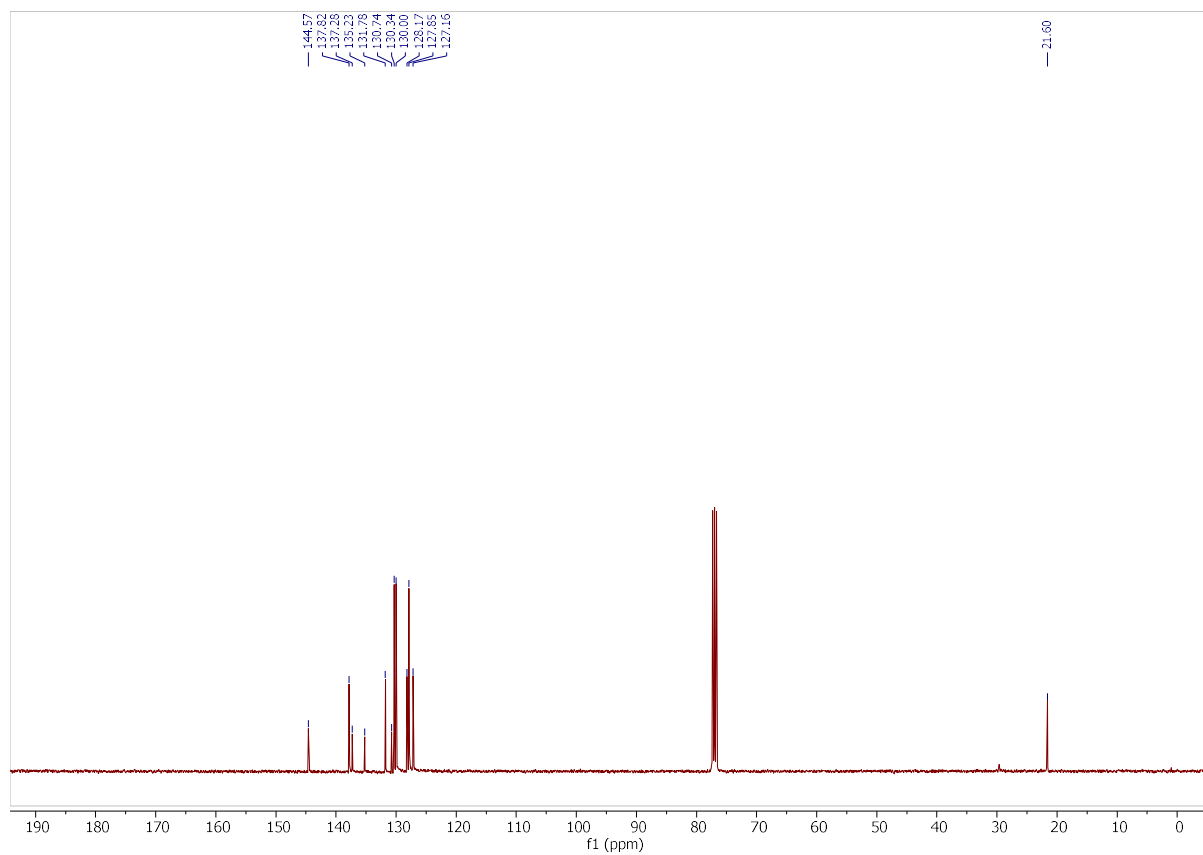

$^1\text{H}$ -NMR Spectrum of compound **40** in  $\text{CDCl}_3$ 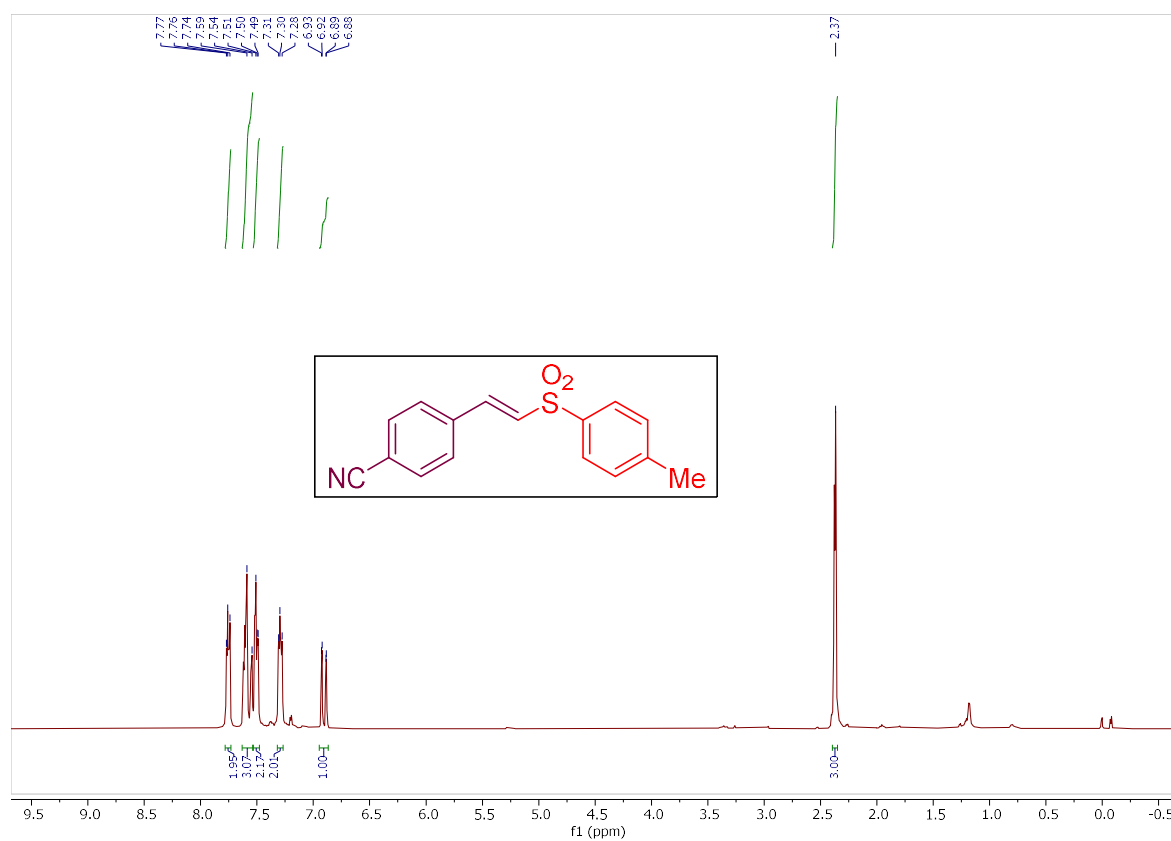 $^{13}\text{C}$ -NMR Spectrum of compound **40** in  $\text{CDCl}_3$ 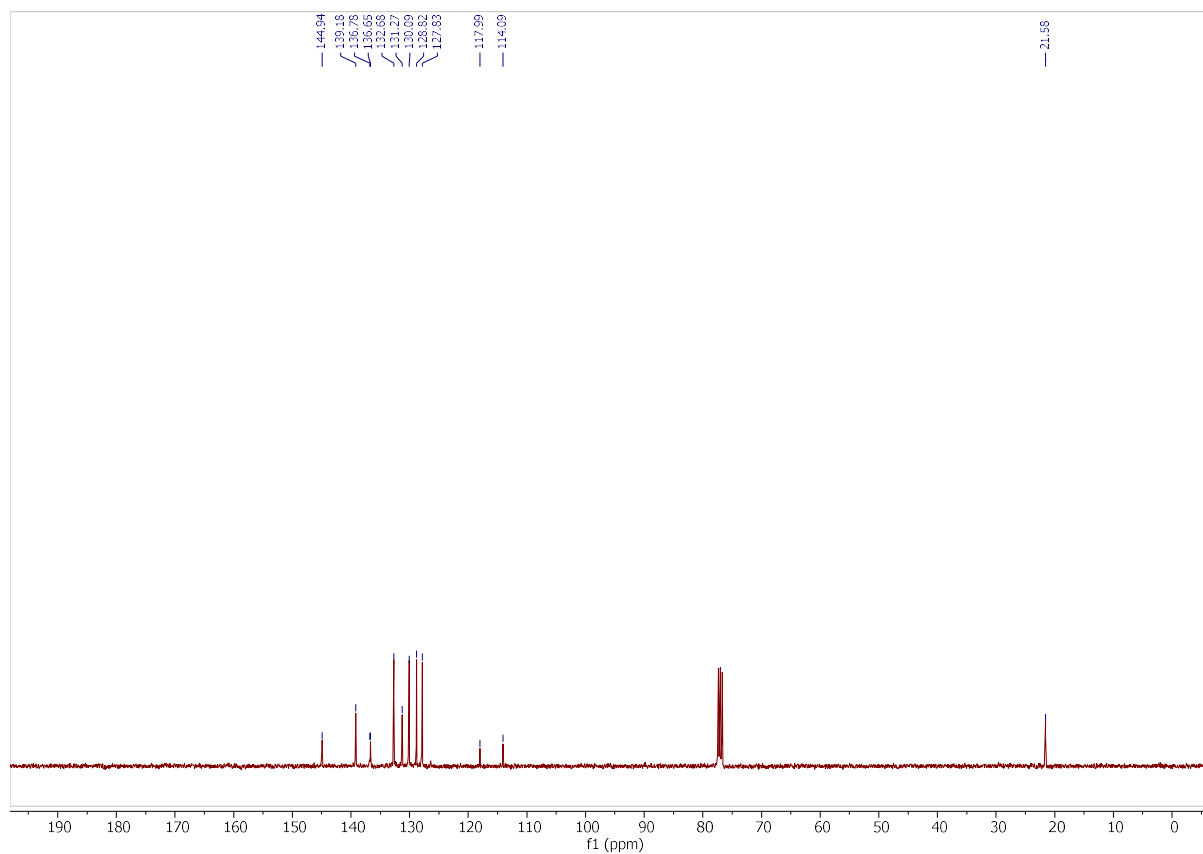



<sup>1</sup>H-NMR Spectrum of compound **42** in CDCl<sub>3</sub>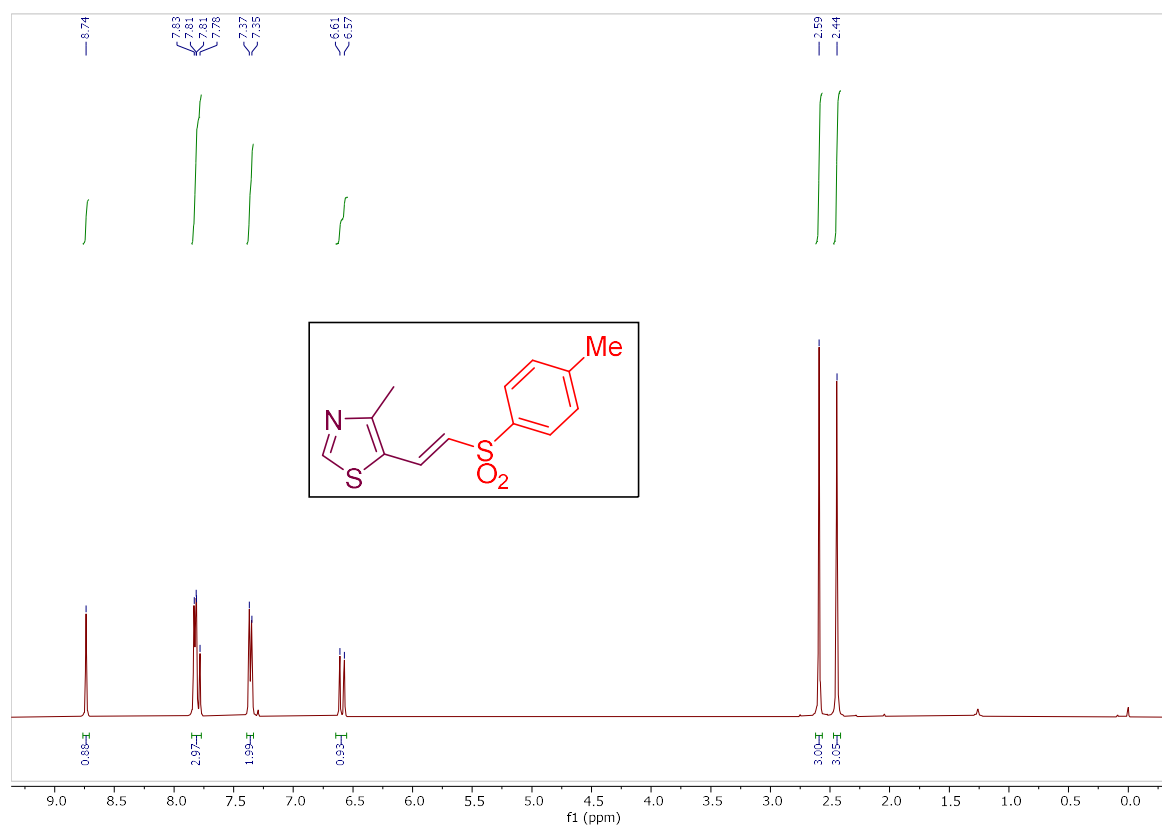<sup>13</sup>C-NMR Spectrum of compound **42** in CDCl<sub>3</sub>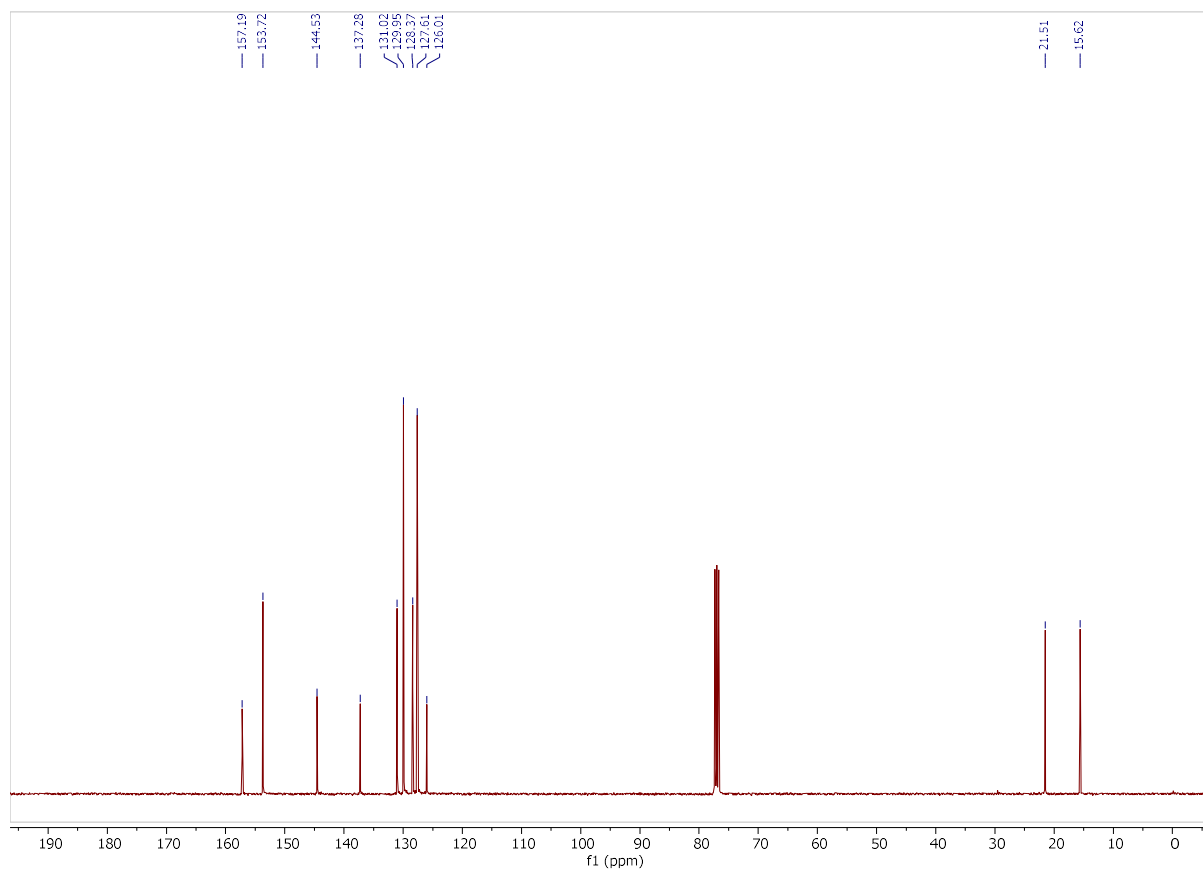



$^1\text{H}$ -NMR Spectrum of compound **43** in  $\text{CDCl}_3$ 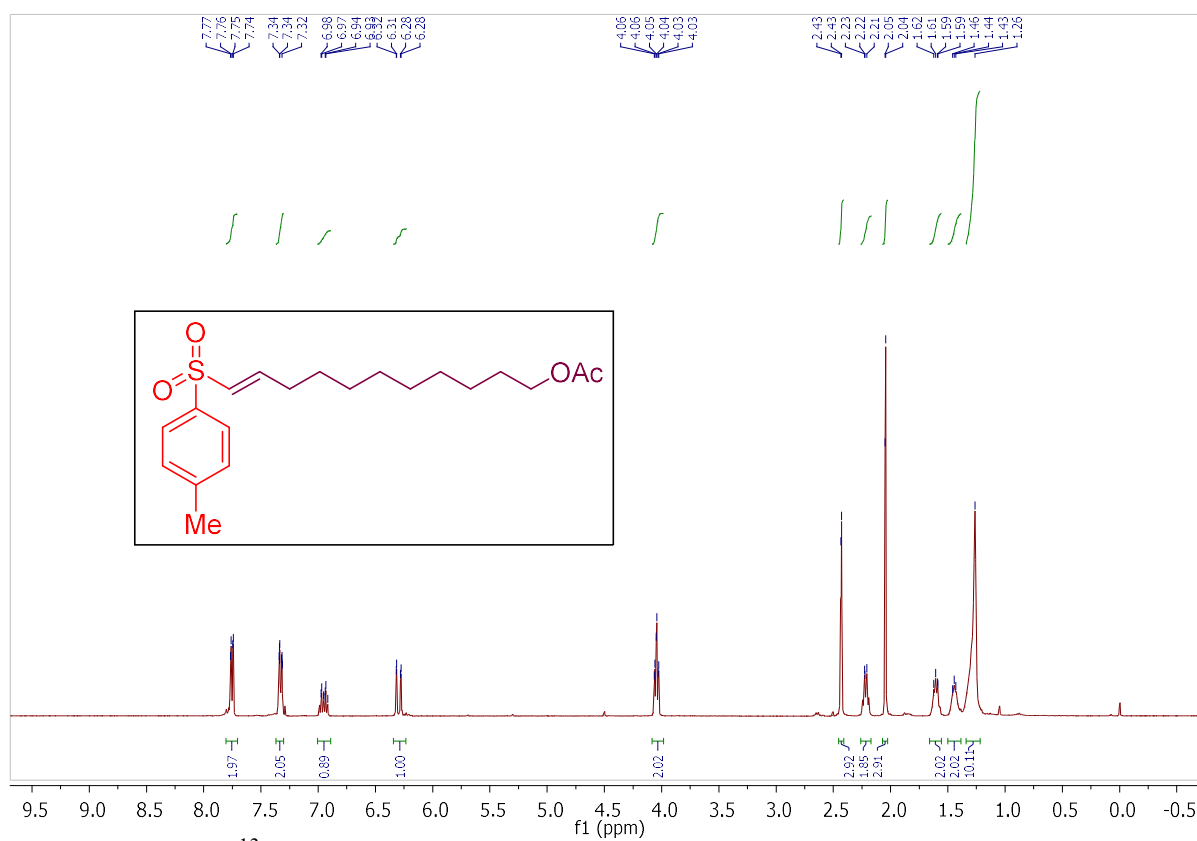 $^{13}\text{C}$ -NMR Spectrum of compound **43** in  $\text{CDCl}_3$ 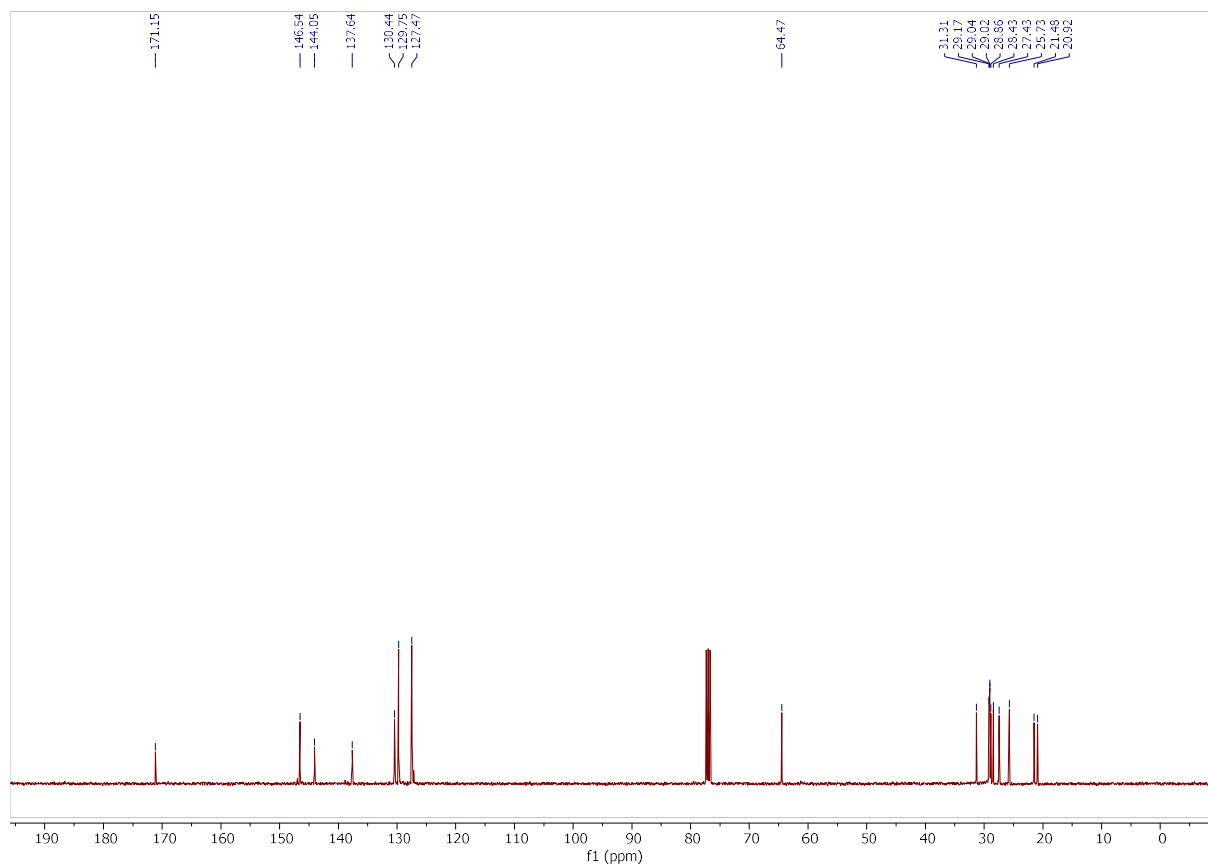

$^1\text{H}$  NMR Spectrum of compound **44** in  $\text{CDCl}_3$ 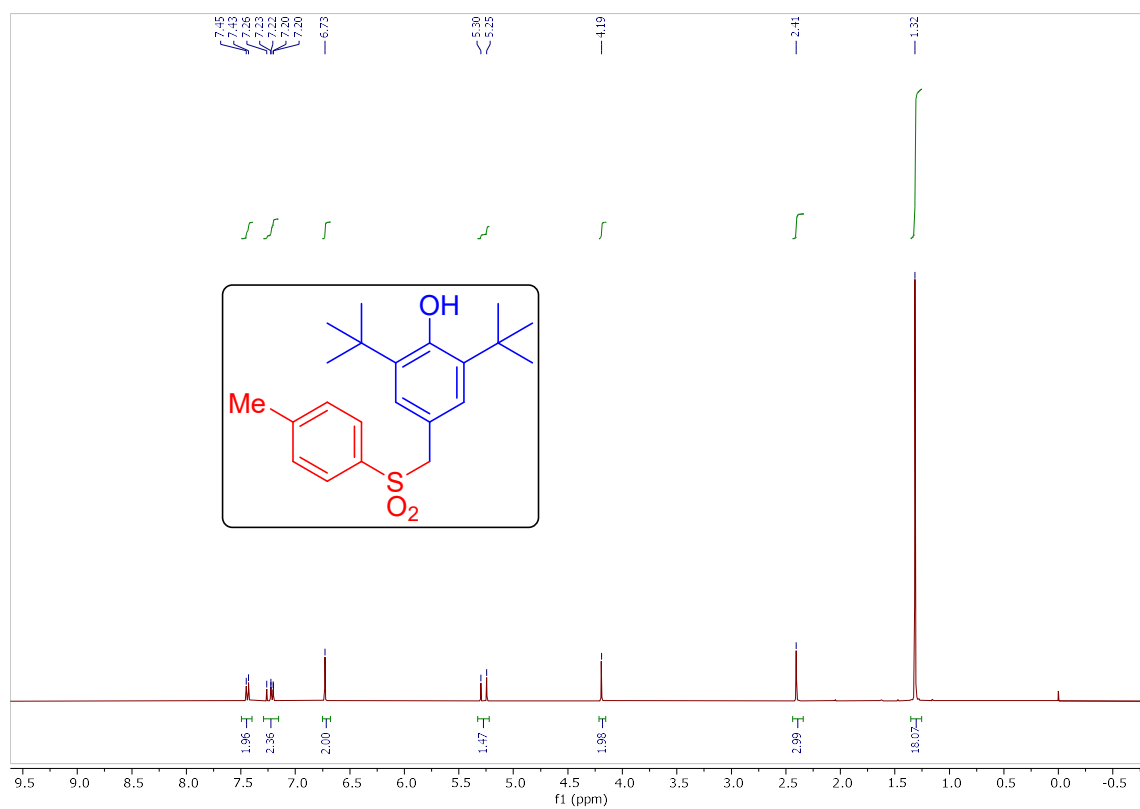 $^{13}\text{C}$  NMR Spectrum of compound **44** in  $\text{CDCl}_3$ 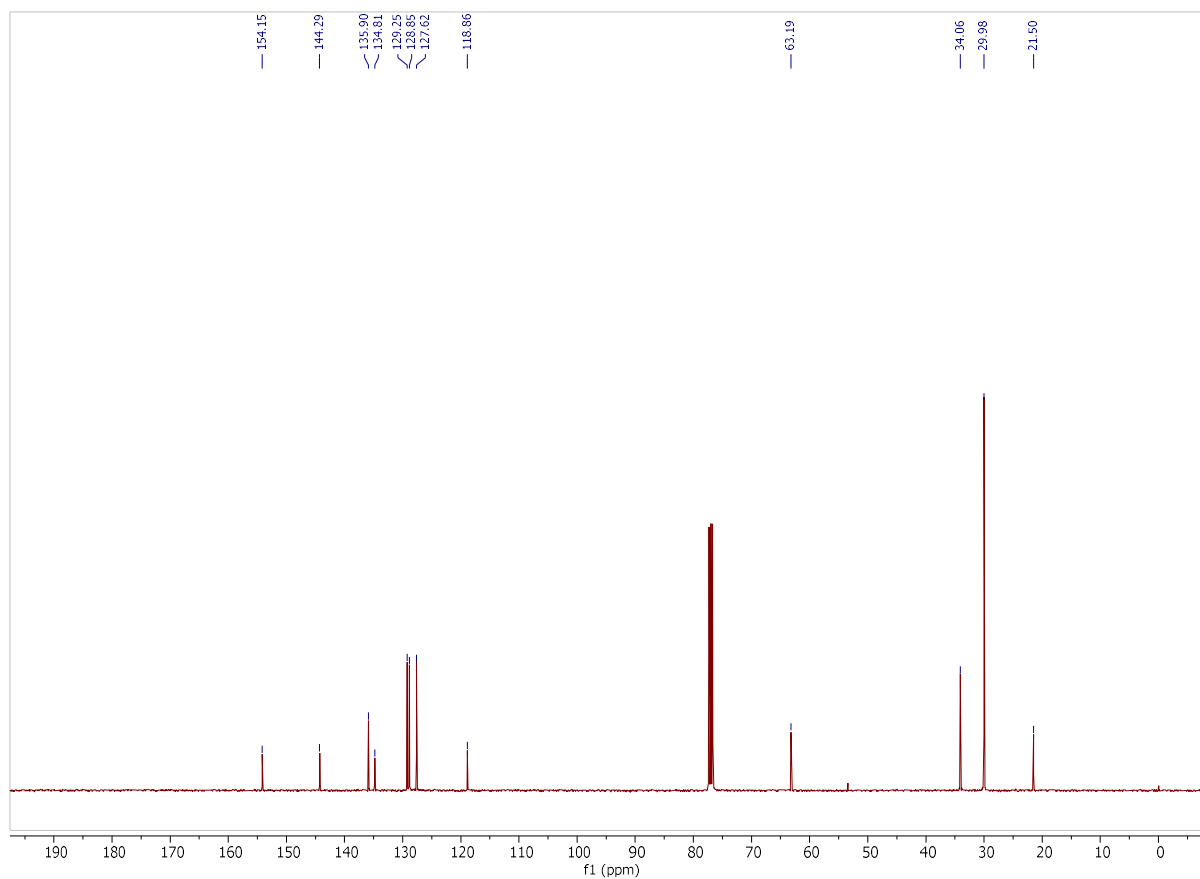

$^1\text{H}$  NMR Spectrum of compound **45** in  $\text{CDCl}_3$ 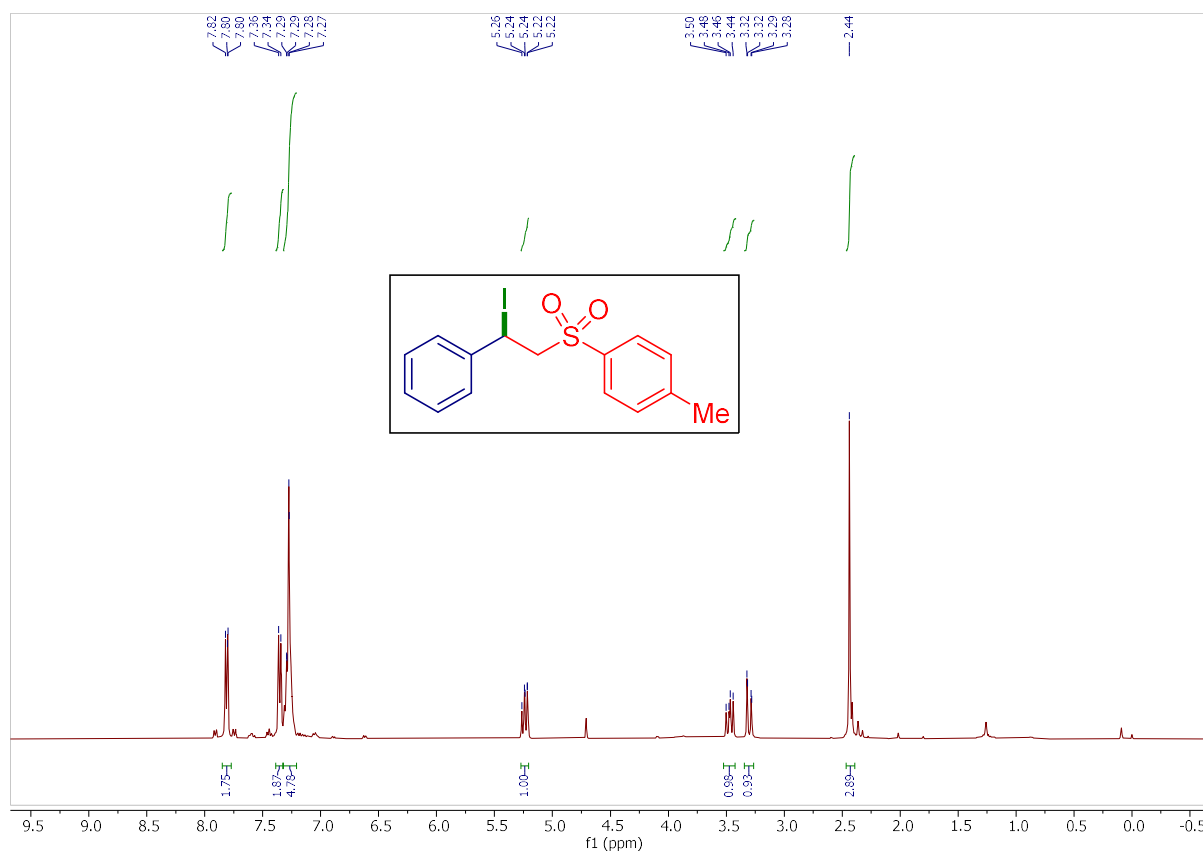 $^{13}\text{C}$  NMR Spectrum of compound **45** in  $\text{CDCl}_3$ 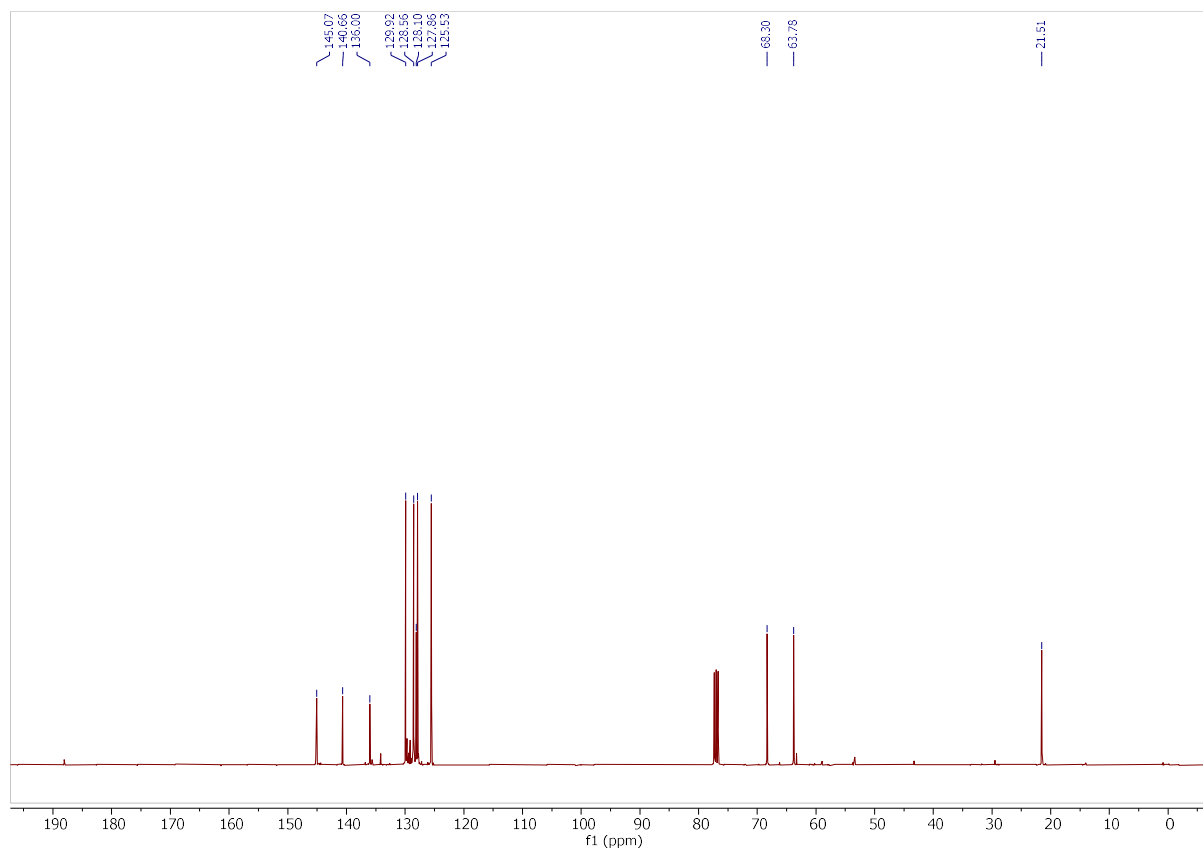

$^1\text{H}$  NMR Spectrum of compound **46** in  $\text{CDCl}_3$ 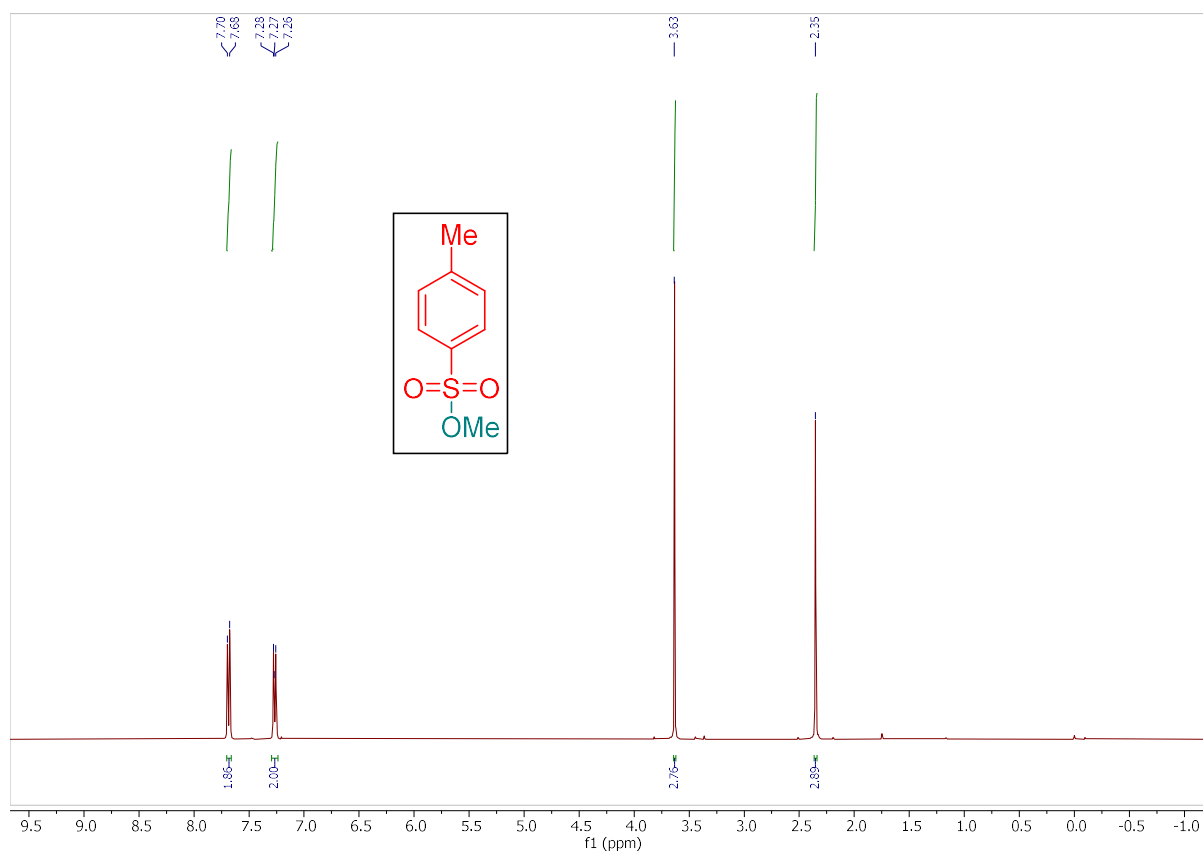 $^1\text{H}$  NMR Spectrum of compound **47** in  $\text{CDCl}_3$ 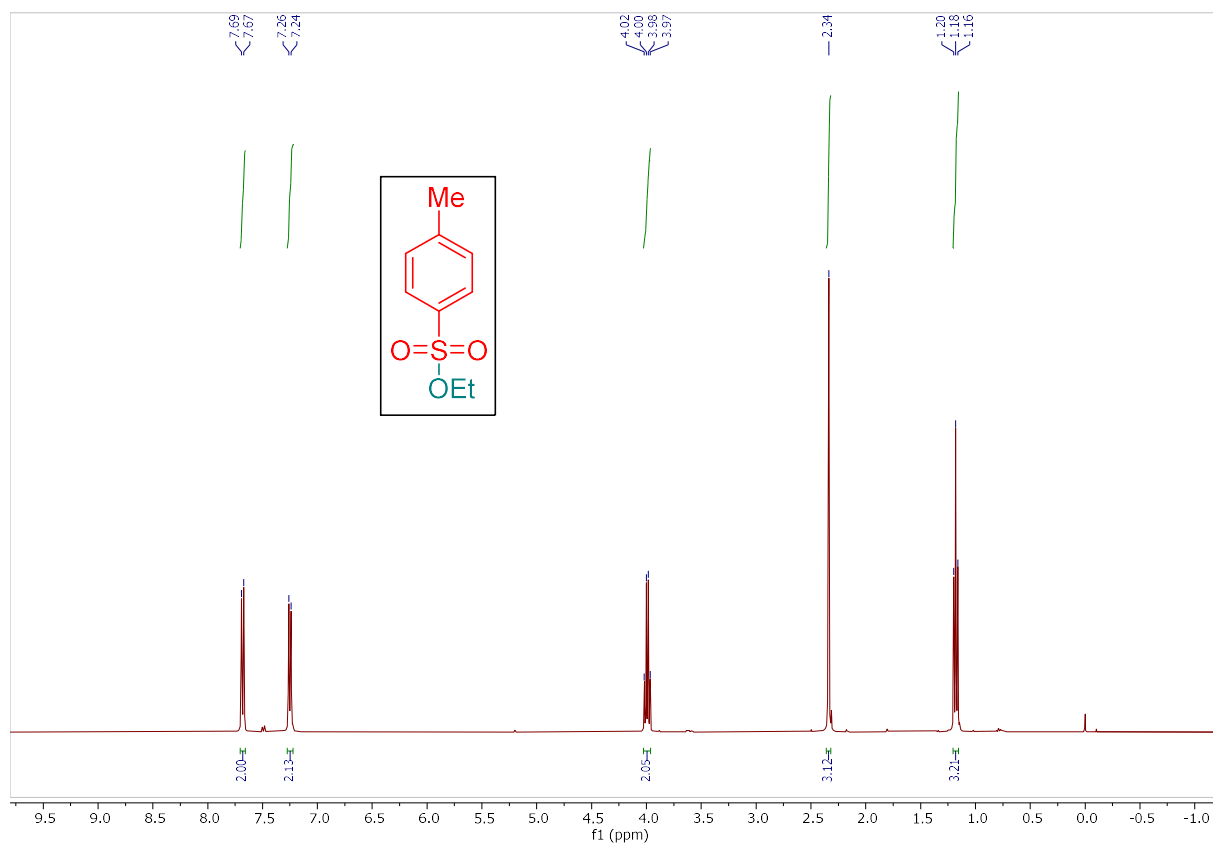

$^1\text{H}$  NMR Spectrum of mixture **45** and **34** in  $\text{CDCl}_3$ 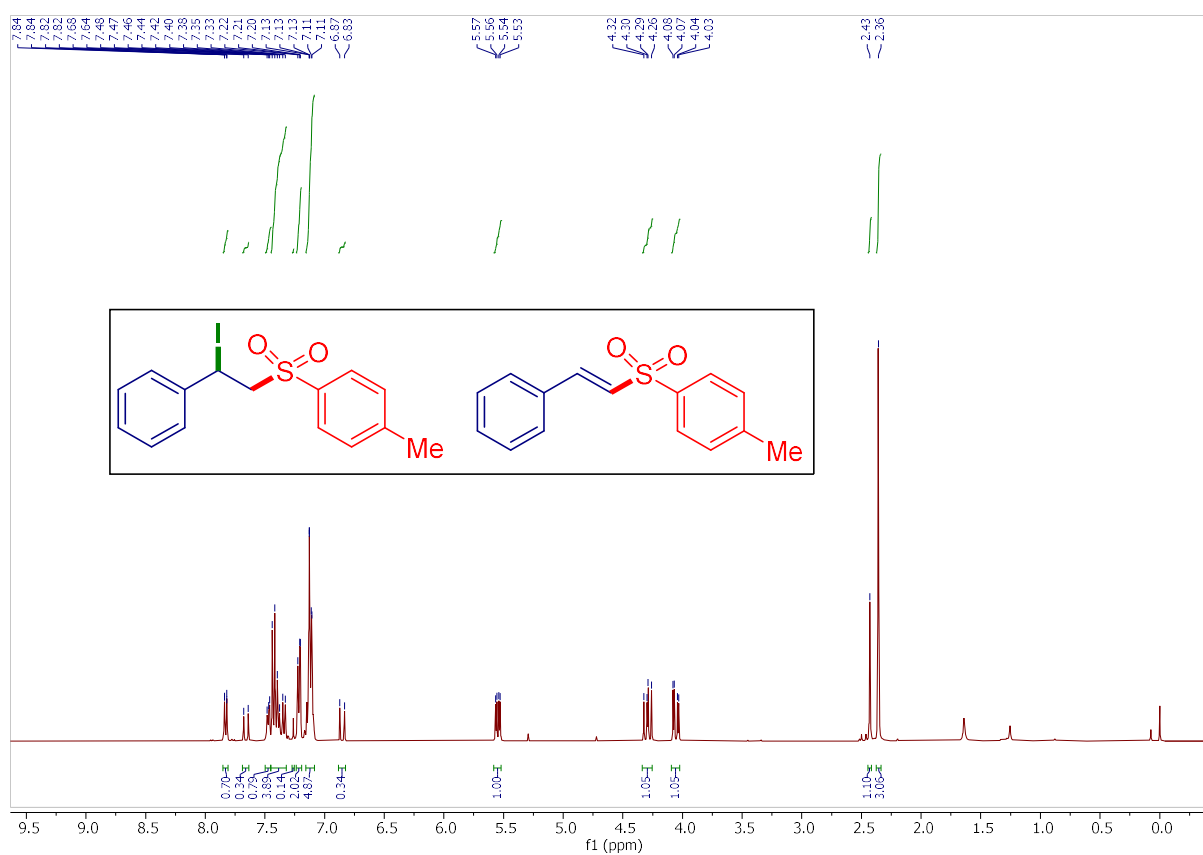 $^{13}\text{C}$  NMR Spectrum of mixture **45** and **34** in  $\text{CDCl}_3$ 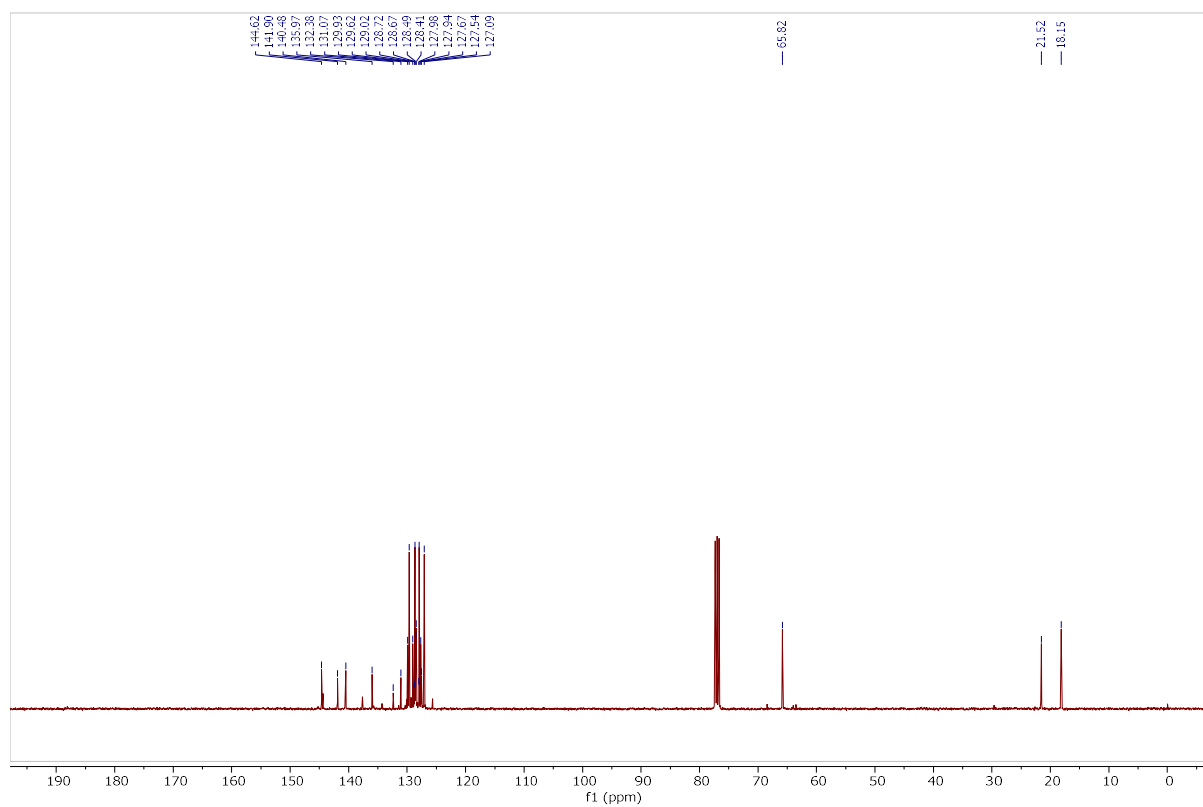

Supplement: d3qo01188g1.pdf [file d3qo01188g1.pdf]
